# Supplementary material for: Integrating Multiple Genomic Data to Predict Disease-Causing Nonsynonymous Single Nucleotide Variants in Exome Sequencing Studies
Source: PLoS Genet. 2014 Mar 20;10(3):e1004237. doi: 10.1371/journal.pgen.1004237 (PMC3961190; doi:10.1371/journal.pgen.1004237)
Supplement: Table S2 — Subsets of data sources selected for individual diseases. (XLS) [file pgen.1004237.s002.xls]

## Sheet: Table S2 (A)
Data sources present in individual diseases before the selection procedure (A data source is said present in a disease if the data source is avalable for at least one nonsynonymous SNV that is causative for the disease. 1: present, 0: absent.)
Disease	Presence of data sources
MIM Morbid Accession	SIFT	PolyPhen2	LRT	MutationTaster	GERP	PhyloP	GO	PPI	Seq	PFAM	KEGG
100070	1	1	1	1	1	1	1	1	1	1	1
100800	1	1	1	1	1	1	1	1	1	1	1
101000	1	1	1	1	1	1	1	1	1	1	0
101400	1	1	1	1	1	1	1	1	1	1	0
101600	1	1	1	1	1	1	1	1	1	1	1
101800	1	1	1	1	1	1	1	1	1	1	1
102370	1	1	1	1	1	1	1	1	1	1	0
102530	1	1	1	1	1	1	1	0	1	0	0
102700	1	1	1	1	1	1	1	1	1	1	1
103050	1	1	1	1	1	1	1	1	1	0	1
103580	1	1	1	1	1	1	1	1	1	1	1
104290	1	1	1	1	1	1	1	1	1	1	1
104300	1	1	1	1	1	1	1	1	1	1	1
105120	1	1	1	1	1	1	1	1	1	1	1
105150	1	1	1	1	1	1	1	1	1	1	1
105200	1	1	1	1	1	1	1	1	1	1	1
105210	1	1	1	1	1	1	1	1	1	0	0
105250	1	1	1	1	1	1	1	1	1	1	1
105400	1	1	1	1	1	1	1	1	1	0	1
105650	1	1	1	1	1	1	1	1	1	0	1
106100	1	1	1	1	1	1	1	1	1	1	1
106210	1	1	1	1	1	1	1	1	1	1	1
106260	1	1	1	1	1	1	1	1	1	1	0
106600	1	1	1	1	1	1	1	1	1	1	0
106700	1	1	1	1	1	1	1	1	1	1	0
107250	1	1	1	1	1	1	1	1	1	1	0
108120	1	1	1	1	1	1	1	1	1	0	1
108300	1	1	1	1	1	1	1	1	1	1	1
108500	1	1	1	1	1	1	1	1	1	1	1
108720	1	1	1	1	1	1	1	1	1	1	1
108721	1	1	1	1	1	1	1	1	1	1	1
108770	1	1	1	1	1	1	1	1	1	1	0
108900	1	1	1	1	1	1	1	1	1	1	0
108985	1	1	1	1	1	1	1	1	1	0	0
109400	1	1	1	1	1	1	1	1	1	1	1
109800	1	1	1	1	1	1	1	1	1	1	1
110100	1	1	1	1	1	1	1	1	1	1	0
112310	1	1	1	1	1	1	1	1	1	1	1
112500	1	1	1	1	1	1	1	1	1	1	1
112600	1	1	1	1	1	1	1	1	1	1	1
113100	1	1	1	1	1	1	1	1	1	1	1
113200	1	1	1	1	1	1	1	1	1	1	0
113300	1	1	1	1	1	1	1	1	1	1	0
113500	1	1	1	1	1	1	1	1	1	1	0
113620	1	1	1	1	1	1	1	1	1	1	0
113650	1	1	1	1	1	1	1	1	1	0	0
113800	1	1	1	1	1	1	1	1	1	1	1
113900	1	1	1	1	1	1	1	1	1	1	0
114000	1	1	1	1	1	1	1	1	1	1	1
114290	1	1	1	1	1	1	1	1	1	1	0
114480	1	1	1	1	1	1	1	1	1	1	1
114500	1	1	1	1	1	1	1	1	1	1	1
114550	1	1	1	1	1	1	1	1	1	1	1
115150	1	1	1	1	1	1	1	1	1	1	1
115195	1	1	1	1	1	1	1	0	1	1	1
115196	1	1	1	1	1	1	1	1	1	0	1
115197	1	1	1	1	1	1	1	1	1	1	1
115200	1	1	1	1	1	1	1	1	1	1	1
115210	1	1	1	1	1	1	1	1	1	1	1
115300	1	1	1	1	1	1	1	1	1	0	1
115310	1	1	1	1	1	1	1	1	1	0	1
115700	1	1	1	1	1	1	1	0	1	1	0
116150	1	1	1	1	1	1	1	1	1	1	0
116200	1	1	1	1	1	1	1	1	1	1	0
116600	1	1	1	1	1	1	1	1	1	1	1
116800	1	1	1	1	1	1	1	1	1	1	0
116860	1	1	1	1	1	1	1	1	1	1	0
116920	1	1	1	1	1	1	1	1	1	1	1
117000	1	1	1	1	1	1	1	1	1	1	1
117550	1	1	1	1	1	1	1	0	1	1	1
118100	1	1	1	1	1	1	1	1	1	1	1
118200	1	1	1	1	1	1	1	1	1	1	1
118210	1	1	1	1	1	1	1	1	1	1	0
118220	1	1	1	1	1	1	1	1	1	1	0
118300	1	1	1	1	1	1	1	1	1	1	0
118400	1	1	1	1	1	1	1	1	1	1	1
118450	1	1	1	1	1	1	1	1	1	1	1
118600	1	1	1	1	1	1	1	1	1	0	0
118700	1	1	1	1	1	1	1	1	1	1	0
118800	1	1	1	1	1	1	1	1	1	1	0
119300	1	1	1	1	1	1	1	1	1	1	0
119500	1	1	1	1	1	1	1	1	1	1	0
119600	1	1	1	1	1	1	1	1	1	0	0
119800	1	1	1	1	1	1	1	1	1	1	0
119900	1	1	1	1	1	1	1	1	1	1	0
120100	1	1	1	1	1	1	1	1	1	1	1
120200	1	1	1	1	1	1	1	1	1	1	1
120330	1	1	1	1	1	1	1	1	1	1	0
120435	1	1	1	1	1	1	1	1	1	1	1
120970	1	1	1	1	1	1	1	1	1	1	0
121050	1	1	1	1	1	1	1	1	1	1	0
121200	1	1	1	1	1	1	1	1	1	1	0
121201	1	1	1	1	1	1	1	1	1	1	0
121300	1	1	1	1	1	1	1	1	1	0	1
121800	1	1	1	1	1	1	1	1	1	0	0
121850	1	1	1	1	1	1	1	1	1	1	1
121900	1	1	1	1	1	1	1	1	1	0	0
122000	1	1	1	1	1	1	1	1	1	1	0
122100	1	1	1	1	1	1	1	1	1	1	0
122200	1	1	1	1	1	1	1	1	1	0	0
122470	1	1	1	1	1	1	1	1	1	0	0
122700	1	1	1	1	1	1	1	0	1	0	0
122860	1	1	1	1	1	1	1	1	1	0	0
122880	1	1	1	1	1	1	1	1	1	1	0
123000	1	1	1	1	1	1	1	1	1	0	0
123100	1	1	1	1	1	1	1	1	1	1	0
123320	1	1	1	1	1	1	1	1	1	0	1
123400	1	1	1	1	1	1	1	0	1	0	1
123500	1	1	1	1	1	1	1	1	1	1	1
123790	1	1	1	1	1	1	1	1	1	1	1
124200	1	1	1	1	1	1	1	0	1	1	1
124500	1	1	1	1	1	1	1	1	1	1	0
125250	1	1	1	1	1	1	1	1	1	1	0
125310	1	1	1	1	1	1	1	1	1	1	1
125420	1	1	1	1	1	1	1	1	1	0	0
125500	1	1	1	1	1	1	1	1	1	0	0
125700	1	1	1	1	1	1	1	1	1	0	1
125800	1	1	1	1	1	1	1	1	1	1	1
125850	1	1	1	1	1	1	1	1	1	1	1
125851	1	1	1	1	1	1	1	1	1	1	1
125853	1	1	1	1	1	1	1	1	1	1	1
126600	1	1	1	1	1	1	1	1	1	1	0
127300	1	1	1	1	1	1	1	1	1	1	0
127400	1	1	1	1	1	1	1	1	1	1	1
127750	1	1	1	1	1	1	1	1	1	0	1
128200	1	1	1	1	1	1	1	0	1	1	0
128230	1	1	1	1	1	1	1	1	1	0	1
128235	1	1	1	1	1	1	1	1	1	1	1
129400	1	1	1	1	1	1	1	1	1	1	0
129490	1	1	1	1	1	1	1	1	1	1	1
129500	1	1	1	1	1	1	1	0	1	1	0
129600	1	1	1	1	1	1	1	1	1	1	0
130000	1	1	1	1	1	1	1	1	1	1	1
130010	1	1	1	1	1	1	1	1	1	1	1
130050	1	1	1	1	1	1	1	1	1	1	1
130070	1	1	1	1	1	1	1	1	1	1	1
130600	1	1	1	1	1	1	1	1	1	1	0
131100	1	1	1	1	1	1	1	1	1	0	0
131300	1	1	1	1	1	1	1	1	1	1	1
131750	1	1	1	1	1	1	1	1	1	1	0
131760	1	1	1	1	1	1	1	1	1	1	0
131800	1	1	1	1	1	1	1	1	1	1	0
131850	1	1	1	1	1	1	1	1	1	1	0
131900	1	1	1	1	1	1	1	1	1	1	0
131950	1	1	1	1	1	1	1	1	1	1	0
132400	1	1	1	1	1	1	1	1	1	1	1
132600	1	1	1	1	1	1	1	1	1	1	1
132800	1	1	1	1	1	1	1	1	1	1	1
132900	1	1	1	1	1	1	1	1	1	1	1
133020	1	1	1	1	1	1	1	0	1	1	0
133100	1	1	1	1	1	1	1	1	1	1	1
133200	1	1	1	1	1	1	1	1	1	1	0
133239	1	1	1	1	1	1	1	1	1	1	1
133700	1	1	1	1	1	1	1	1	1	1	1
133701	1	1	1	1	1	1	1	1	1	1	1
133780	1	1	1	1	1	1	1	0	1	1	1
134610	1	1	1	1	1	1	1	1	1	1	1
135100	1	1	1	1	1	1	1	1	1	1	1
135150	1	1	1	1	1	1	1	1	1	0	1
135700	1	1	1	1	1	1	1	1	1	1	0
136120	1	1	1	1	1	1	1	1	1	0	1
136520	1	1	1	1	1	1	1	1	1	1	1
136680	1	1	1	1	1	1	1	1	1	1	0
136760	1	1	1	1	1	1	1	0	1	1	0
136800	1	1	1	1	1	1	1	1	1	1	0
136880	1	1	1	1	1	1	1	1	1	1	1
136900	1	1	1	1	1	1	1	1	1	0	0
137215	1	1	1	1	1	1	1	1	1	1	1
137440	1	1	1	1	1	1	1	0	1	0	1
137600	1	1	1	1	1	1	1	1	1	1	1
137750	1	1	1	1	1	1	1	1	1	1	0
137760	1	1	1	1	1	1	1	1	1	0	0
137920	1	1	1	1	1	1	1	1	1	1	1
138500	1	1	1	1	1	1	1	1	1	1	0
138800	1	1	1	1	1	1	1	1	1	1	0
139090	1	1	1	1	1	1	1	0	1	1	0
139210	1	1	1	1	1	1	1	1	1	1	1
140000	1	1	1	1	1	1	1	1	1	1	0
141200	1	1	1	1	1	1	1	1	1	1	1
141500	1	1	1	1	1	1	1	1	1	1	1
142623	1	1	1	1	1	1	1	1	1	1	1
142680	1	1	1	1	1	1	1	1	1	1	1
142690	1	1	1	1	1	1	1	1	1	0	1
142900	1	1	1	1	1	1	1	1	1	1	0
142945	1	1	1	1	1	1	1	1	1	0	1
142946	1	1	1	1	1	1	1	1	1	1	0
143095	1	1	1	1	1	1	1	1	1	1	1
143470	1	1	1	1	1	1	1	1	1	0	0
143500	1	1	1	1	1	1	1	1	1	1	1
143860	1	1	1	1	1	1	1	0	1	1	1
143880	1	1	1	1	1	1	1	1	1	1	0
143890	1	1	1	1	1	1	1	1	1	1	1
144010	1	1	1	1	1	1	1	1	1	0	1
144200	1	1	1	1	1	1	1	1	1	1	0
144700	1	1	1	1	1	1	1	1	1	0	1
144750	1	1	1	1	1	1	1	1	1	1	1
145000	1	1	1	1	1	1	1	1	1	0	0
145001	1	1	1	1	1	1	1	1	1	0	0
145250	1	1	1	1	1	1	1	1	1	0	1
145600	1	1	1	1	1	1	1	1	1	1	1
145650	1	1	1	1	1	1	1	1	1	1	1
145900	1	1	1	1	1	1	1	1	1	1	1
145980	1	1	1	1	1	1	1	1	1	1	0
146000	1	1	1	1	1	1	1	1	1	1	1
146110	1	1	1	1	1	1	1	1	1	1	1
146200	1	1	1	1	1	1	1	1	1	1	0
146255	1	1	1	1	1	1	1	1	1	1	0
146300	1	1	1	1	1	1	1	1	1	0	1
146510	1	1	1	1	1	1	1	0	1	1	0
146800	1	1	1	1	1	1	1	1	1	1	0
147060	1	1	1	1	1	1	1	1	1	1	1
147250	1	1	1	1	1	1	1	1	1	0	1
147480	1	1	1	1	1	1	1	1	1	1	1
147891	1	1	1	1	1	1	1	1	1	1	0
147920	1	1	1	1	1	1	1	1	1	1	0
147950	1	1	1	1	1	1	1	1	1	1	1
148210	1	1	1	1	1	1	1	1	1	1	0
148300	1	1	1	1	1	1	1	1	1	1	0
148350	1	1	1	1	1	1	1	1	1	1	0
148500	1	1	1	1	1	1	1	0	1	1	0
148820	1	1	1	1	1	1	1	1	1	1	0
149000	1	1	1	1	1	1	1	1	1	1	0
149200	1	1	1	1	1	1	1	1	1	1	0
149400	1	1	1	1	1	1	1	1	1	1	1
149730	1	1	1	1	1	1	1	1	1	1	1
150250	1	1	1	1	1	1	1	1	1	1	1
150800	1	1	1	1	1	1	1	1	1	0	1
151210	1	1	1	1	1	1	1	1	1	1	1
151600	1	1	1	1	1	1	1	0	1	1	1
151623	1	1	1	1	1	1	1	1	1	1	1
151660	1	1	1	1	1	1	1	1	1	1	1
152700	1	1	1	1	1	1	1	0	1	0	1
152950	1	1	1	1	1	1	1	1	1	1	0
153100	1	1	1	1	1	1	1	1	1	1	1
153400	1	1	1	1	1	1	1	1	1	1	0
153480	1	1	1	1	1	1	1	1	1	1	1
153640	1	1	1	1	1	1	1	1	1	1	1
153650	1	1	1	1	1	1	1	1	1	1	1
153700	1	1	1	1	1	1	1	1	1	0	0
153800	1	1	1	1	1	1	1	1	1	1	1
154020	1	1	1	1	1	1	1	0	1	1	1
154500	1	1	1	1	1	1	1	1	1	0	1
154700	1	1	1	1	1	1	1	1	1	1	0
155100	1	1	1	1	1	1	1	1	1	1	1
155240	1	1	1	1	1	1	1	1	1	1	1
155255	1	1	1	1	1	1	1	1	1	1	1
155601	1	1	1	1	1	1	1	1	1	1	1
156400	1	1	1	1	1	1	1	1	1	1	1
156500	1	1	1	1	1	1	1	1	1	1	0
156530	1	1	1	1	1	1	1	1	1	1	0
157170	1	1	1	1	1	1	1	1	1	1	0
157640	1	1	1	1	1	1	1	1	1	0	1
158000	1	1	1	1	1	1	1	1	1	1	0
158300	1	1	1	1	1	1	1	0	1	1	1
158350	1	1	1	1	1	1	1	1	1	1	1
158590	1	1	1	1	1	1	1	1	1	1	0
158600	1	1	1	1	1	1	1	1	1	1	1
158810	1	1	1	1	1	1	1	1	1	1	1
159000	1	1	1	1	1	1	1	1	1	1	0
159001	1	1	1	1	1	1	1	1	1	1	1
159900	1	1	1	1	1	1	1	1	1	1	1
160120	1	1	1	1	1	1	1	0	1	1	0
160150	1	1	1	1	1	1	1	1	1	1	1
160500	1	1	1	1	1	1	1	1	1	1	1
160800	1	1	1	1	1	1	1	1	1	1	0
160980	1	1	1	1	1	1	1	1	1	1	1
161200	1	1	1	1	1	1	1	1	1	1	0
161400	1	1	1	1	1	1	1	1	1	0	0
161800	1	1	1	1	1	1	1	1	1	1	0
162000	1	1	1	1	1	1	1	1	1	1	0
162100	1	1	1	1	1	1	1	1	1	1	0
162200	1	1	1	1	1	1	1	1	1	1	1
162300	1	1	1	1	1	1	1	1	1	1	1
162350	1	1	1	1	1	1	1	1	1	1	1
162400	1	1	1	1	1	1	1	1	1	1	1
162500	1	1	1	1	1	1	1	1	1	1	0
162800	1	1	1	1	1	1	1	1	1	1	1
162830	1	1	1	1	1	1	1	0	1	1	1
162900	1	1	1	1	1	1	1	1	1	1	1
163500	1	1	1	1	1	1	1	1	1	1	1
163800	1	1	1	1	1	1	1	1	1	1	0
164200	1	1	1	1	1	1	1	1	1	1	1
164280	1	1	1	1	1	1	1	1	1	1	0
165300	1	1	1	1	1	1	1	1	1	0	0
165500	1	1	1	1	1	1	1	1	1	1	0
165550	1	1	1	1	1	1	1	1	1	1	1
166000	1	1	1	1	1	1	1	1	1	1	1
166200	1	1	1	1	1	1	1	1	1	1	1
166210	1	1	1	1	1	1	1	1	1	1	1
166220	1	1	1	1	1	1	1	1	1	1	1
166250	1	1	1	1	1	1	1	1	1	1	1
166260	1	1	1	1	1	1	0	0	1	1	0
166300	1	1	1	1	1	1	1	1	1	1	0
166350	1	1	1	1	1	1	1	1	1	1	1
166600	1	1	1	1	1	1	1	0	1	1	0
167200	1	1	1	1	1	1	1	1	1	1	0
167210	1	1	1	1	1	1	1	1	1	1	0
167320	1	1	1	1	1	1	1	1	1	1	1
167800	1	1	1	1	1	1	1	1	1	1	1
168000	1	1	1	1	1	1	1	1	1	0	1
168300	1	1	1	1	1	1	1	1	1	1	0
168400	1	1	1	1	1	1	1	1	1	1	0
168500	1	1	1	1	1	1	1	1	1	1	0
168600	1	1	1	1	1	1	1	1	1	1	1
168601	1	1	1	1	1	1	1	1	1	0	1
168605	1	1	1	1	1	1	1	1	1	1	1
169100	1	1	1	1	1	1	1	1	1	1	0
169150	1	1	1	1	1	1	1	1	1	1	1
169400	1	1	1	1	1	1	1	1	1	0	0
169600	1	1	1	1	1	1	1	0	1	1	0
170390	1	1	1	1	1	1	1	1	1	1	1
170400	1	1	1	1	1	1	1	1	1	1	1
170500	1	1	1	1	1	1	1	1	1	1	0
170650	1	1	1	1	1	1	1	1	1	1	1
171300	1	1	1	1	1	1	1	1	1	1	1
171400	1	1	1	1	1	1	1	1	1	1	1
172700	1	1	1	1	1	1	1	0	1	0	1
172800	1	1	1	1	1	1	1	1	1	1	1
172870	1	1	0	1	1	1	1	1	1	1	0
173100	1	1	1	1	1	1	1	1	1	1	1
173600	1	1	1	1	1	1	1	1	1	0	1
173650	1	1	1	1	1	1	1	1	1	1	0
173900	1	1	1	1	1	1	1	1	1	1	0
174200	1	1	1	1	1	1	1	0	1	1	1
174800	1	1	1	1	1	1	1	1	1	1	1
174900	1	1	1	1	1	1	1	1	1	1	1
175100	1	1	1	1	1	1	1	1	1	1	1
175200	1	1	1	1	1	1	1	1	1	1	1
175700	1	1	1	1	1	1	1	0	1	1	1
175780	1	1	1	1	1	1	1	1	1	1	1
175900	1	1	1	1	1	1	1	1	1	1	0
176100	1	1	1	1	1	1	1	1	1	0	1
176200	1	1	1	1	1	1	1	1	1	1	1
176305	1	1	1	1	1	1	1	1	1	1	0
176400	1	1	1	1	1	1	1	1	1	1	1
176410	1	1	1	1	1	1	1	1	1	1	1
176430	1	1	1	1	1	1	1	1	1	1	1
176450	1	1	1	1	1	1	1	1	1	1	1
176670	1	1	1	1	1	1	1	1	1	1	1
176807	1	1	1	1	1	1	1	1	1	1	1
176860	1	1	1	1	1	1	1	1	1	1	1
176920	1	1	1	1	1	1	1	1	1	1	1
177000	1	1	1	1	1	1	1	1	1	0	1
177170	1	1	1	1	1	1	1	1	1	1	1
177200	1	1	1	1	1	1	1	1	1	0	1
178600	1	1	1	1	1	1	1	1	1	1	1
179800	1	1	1	1	1	1	1	1	1	1	1
180100	1	1	1	1	1	1	1	1	1	1	0
180104	1	1	1	1	1	1	1	1	1	0	0
180105	1	1	1	1	1	1	1	1	1	1	1
180200	1	1	1	1	1	1	1	1	1	0	1
180500	1	1	1	1	1	1	1	1	1	1	1
180700	1	1	1	1	1	1	1	1	1	1	1
180800	1	1	1	1	1	1	1	1	1	1	1
180849	1	1	1	1	1	1	1	1	1	1	1
181350	1	1	1	1	1	1	1	1	1	1	1
181400	1	1	1	1	1	1	1	1	1	1	1
181405	1	1	1	1	1	1	1	1	1	1	0
181430	1	1	1	1	1	1	1	1	1	1	1
181450	1	1	1	1	1	1	1	1	1	1	0
182000	1	1	1	1	1	1	1	1	1	1	1
182230	1	1	1	1	1	1	1	1	1	1	0
182600	1	1	1	1	1	1	1	1	1	1	0
182601	1	1	1	1	1	1	1	1	1	1	0
182900	1	1	1	1	1	1	1	1	1	1	0
182920	1	1	1	1	1	1	1	1	1	1	0
182940	1	1	1	1	1	1	1	1	1	1	1
182980	1	1	1	1	1	1	1	1	1	1	0
183086	1	1	1	1	1	1	1	1	1	1	1
183900	1	1	1	1	1	1	1	1	1	1	1
184250	1	1	1	1	1	1	1	1	1	1	1
184252	1	1	1	1	1	1	1	1	1	1	0
184500	1	1	1	1	1	1	1	1	1	1	0
184900	1	1	1	1	1	1	1	1	1	1	0
185800	1	1	1	1	1	1	1	1	1	1	1
186000	1	1	1	1	1	1	1	1	1	1	0
186100	1	1	1	1	1	1	1	1	1	1	1
186300	1	1	1	1	1	1	1	1	1	1	0
186500	1	1	1	1	1	1	1	1	1	0	1
186570	1	1	1	1	1	1	1	1	1	0	1
186580	1	1	1	1	1	1	1	1	1	1	1
187300	1	1	1	1	1	1	1	1	1	1	0
187500	1	1	1	1	1	1	1	1	1	1	1
187600	1	1	1	1	1	1	1	1	1	1	1
187601	1	1	1	1	1	1	1	1	1	1	1
188000	1	1	1	1	1	1	1	0	0	1	0
188055	1	1	1	1	1	1	1	1	1	1	1
188400	1	1	0	1	1	1	1	1	1	1	0
188570	1	1	1	1	1	1	1	1	1	1	1
190350	1	1	1	1	1	1	1	1	1	1	0
190351	1	1	1	1	1	1	1	1	1	1	0
190440	1	1	1	1	1	1	1	1	1	1	1
190900	1	1	1	1	1	1	1	1	1	1	0
191100	1	1	1	1	1	1	1	1	1	0	1
191830	1	1	1	1	1	1	1	1	1	1	1
191900	1	1	1	1	1	1	1	1	1	1	1
192430	1	1	1	1	1	1	1	1	1	1	0
192500	1	1	1	1	1	1	1	1	1	1	1
192600	1	1	1	1	1	1	1	1	1	1	1
192950	1	1	1	1	1	1	1	1	1	1	0
193100	1	1	1	1	1	1	1	1	1	1	1
193230	1	1	1	1	1	1	1	1	1	1	1
193300	1	1	1	1	1	1	1	1	1	0	1
193500	1	1	1	1	1	1	1	1	1	1	0
193530	1	1	1	1	1	1	1	1	1	0	0
193700	1	1	1	1	1	1	1	1	1	1	1
193900	1	1	1	1	1	1	1	1	1	1	0
194070	1	1	1	1	1	1	1	1	1	1	0
194080	1	1	1	1	1	1	1	1	1	1	0
194200	1	1	1	1	1	1	1	1	1	1	1
194300	1	1	1	1	1	1	0	0	1	1	0
200100	1	1	1	1	1	1	1	1	1	0	1
200150	1	1	1	1	1	1	1	1	1	1	0
200610	1	1	1	1	1	1	1	1	1	1	1
200700	1	1	1	1	1	1	1	1	1	1	1
200990	1	1	1	1	1	1	1	0	1	1	0
201000	1	1	1	1	1	1	1	1	1	1	1
201100	1	1	1	1	1	1	1	0	1	1	1
201400	1	1	1	1	1	1	1	1	1	1	0
201450	1	1	1	1	1	1	1	1	1	1	1
201470	1	1	1	1	1	1	1	1	1	1	1
201475	1	1	1	1	1	1	1	1	1	1	1
201710	1	1	1	1	1	1	1	1	1	1	0
201750	1	1	1	1	1	1	1	0	1	1	0
201810	1	1	1	1	1	1	1	1	1	1	1
202110	1	1	1	1	1	1	1	1	1	1	1
202200	1	1	1	1	1	1	1	1	1	1	1
202370	1	1	1	1	1	1	1	1	1	1	1
202400	1	1	1	1	1	1	1	1	1	1	1
202650	1	1	1	1	1	1	1	1	1	1	0
202700	1	1	1	1	1	1	1	1	1	1	1
203100	1	1	1	1	1	1	1	1	1	0	1
203200	1	1	1	1	1	1	1	1	1	1	0
203290	1	1	1	1	1	1	1	1	1	0	1
203400	1	1	1	1	1	1	1	1	1	1	1
203450	1	1	1	1	1	1	1	1	1	1	0
203500	1	1	1	1	1	1	1	1	1	0	1
203655	1	1	1	1	1	1	1	0	1	1	0
203700	1	1	1	1	1	1	1	1	1	0	1
203750	1	1	1	1	1	1	1	1	1	1	1
203780	1	1	1	1	1	1	1	1	1	1	1
204000	1	1	1	1	1	1	1	1	1	1	1
204100	1	1	1	1	1	1	1	1	1	0	1
204200	1	1	1	1	1	1	1	0	1	0	1
204300	1	1	1	1	1	1	1	1	1	0	0
204500	1	1	1	1	1	1	1	1	1	1	1
205400	1	1	1	1	1	1	1	1	1	1	1
205950	1	1	1	1	1	1	1	0	1	1	0
206100	1	1	1	1	1	1	1	1	1	0	1
206200	1	1	1	1	1	1	1	1	1	1	0
206800	1	1	1	1	1	1	1	0	1	0	0
207750	1	1	1	1	1	1	1	1	1	0	0
207800	1	1	1	1	1	1	1	1	1	0	1
207900	1	1	1	1	1	1	1	1	1	0	1
208000	1	1	1	1	1	1	1	1	1	1	1
208050	1	1	1	1	1	1	1	0	1	1	0
208085	1	1	1	1	1	1	1	1	1	1	0
208150	1	1	1	1	1	1	1	1	1	1	0
208230	1	1	1	1	1	1	1	1	1	1	0
208400	1	1	1	1	1	1	1	0	1	0	1
208540	1	1	1	1	1	1	1	1	1	1	0
208900	1	1	1	1	1	1	1	1	1	1	1
208920	1	1	1	1	1	1	1	1	1	0	0
209300	1	1	1	1	1	1	1	1	1	0	1
209880	1	1	1	1	1	1	1	1	1	1	1
209900	1	1	1	1	1	1	1	1	1	1	1
209920	1	1	1	1	1	1	1	1	1	1	1
209950	1	1	1	1	1	1	1	1	1	1	1
210200	1	1	1	1	1	1	1	1	1	1	1
210210	1	1	1	1	1	1	1	0	1	0	1
210250	1	1	1	1	1	1	1	1	1	1	1
210370	1	1	1	1	1	1	1	0	1	1	0
210900	1	1	1	1	1	1	1	1	1	1	1
211400	1	1	1	1	1	1	1	1	1	0	1
211600	1	1	1	1	1	1	1	1	1	1	0
211750	1	1	1	1	1	1	1	1	1	1	0
211800	1	1	1	1	1	1	1	1	1	1	1
211900	1	1	1	1	1	1	1	1	1	1	1
211980	1	1	1	1	1	1	1	1	1	1	1
212065	1	1	1	1	1	1	1	1	1	0	1
212066	1	1	1	1	1	1	1	1	1	0	1
212070	1	1	1	1	1	1	1	1	1	1	0
212112	1	1	1	1	1	1	1	1	1	1	1
212140	1	1	1	1	1	1	1	1	1	1	0
212550	1	1	1	1	1	1	1	1	1	1	0
212720	0	1	1	1	1	1	1	1	1	0	0
212780	1	1	1	1	1	1	1	0	1	1	0
213300	1	1	1	1	1	1	1	1	1	1	1
213700	1	1	1	1	1	1	1	1	1	1	1
214100	1	1	1	1	1	1	1	1	1	0	1
214150	1	1	0	0	1	1	1	1	1	1	0
214400	1	1	1	1	1	1	1	1	1	1	0
214500	1	1	1	1	1	1	1	1	1	1	0
214700	1	1	1	1	1	1	1	1	1	1	1
214800	1	1	1	1	1	1	1	1	1	1	0
214950	1	1	1	1	1	1	1	1	1	0	1
215045	1	1	0	1	1	1	1	1	1	1	1
215100	1	1	1	1	1	1	1	1	1	1	1
215150	1	1	1	1	1	1	1	0	1	1	1
215300	1	1	1	1	1	1	1	1	1	1	1
215600	1	1	1	1	1	1	1	1	1	1	1
215700	1	1	1	1	1	1	1	1	1	0	1
216360	1	1	1	1	1	1	1	1	1	1	0
216400	1	1	1	1	1	1	1	1	1	1	1
216550	1	1	1	1	1	1	1	0	1	1	0
216900	1	1	1	1	1	1	1	1	1	1	1
217080	1	1	1	1	1	1	1	1	1	1	0
217090	1	1	1	1	1	1	1	1	1	1	1
217095	1	1	1	1	1	1	1	1	1	1	0
217300	1	1	1	1	1	1	1	1	1	1	0
217400	1	1	1	1	1	1	1	1	1	1	0
217700	1	1	1	1	1	1	1	1	1	1	0
217800	1	1	1	1	1	1	1	0	1	1	1
218040	1	1	1	1	1	1	1	1	1	1	1
218330	1	1	1	1	1	1	1	0	1	1	0
218700	1	1	1	1	1	1	1	1	1	1	1
218800	1	1	1	1	1	1	1	1	1	1	1
219000	1	1	1	1	1	1	1	0	1	1	0
219050	1	1	1	1	1	1	1	1	1	1	1
219080	1	1	1	1	1	1	1	1	1	1	1
219100	1	1	1	1	1	1	1	1	1	1	0
219150	1	1	1	1	1	1	1	1	1	1	1
219500	1	1	1	1	1	1	1	1	1	0	1
219700	1	1	1	1	1	1	1	1	1	1	1
219750	1	1	1	1	1	1	1	1	1	1	1
219800	1	1	1	1	1	1	1	1	1	1	1
219900	1	1	1	1	1	1	1	1	1	1	1
220100	1	1	1	1	1	1	1	1	1	1	1
220110	1	1	1	1	1	1	1	1	1	0	1
220111	1	1	1	1	1	1	1	1	1	0	0
220120	1	1	1	1	1	1	1	1	1	0	1
220150	1	1	1	1	1	1	1	1	1	1	0
220290	1	1	1	1	1	1	1	1	1	1	0
220400	1	1	1	1	1	1	1	1	1	1	1
220600	1	1	1	1	1	1	1	1	1	1	0
221750	1	1	1	1	1	1	1	1	1	1	0
221770	1	1	1	1	1	1	1	1	1	1	1
221820	1	1	1	1	1	1	1	1	1	1	1
222300	1	1	1	1	1	1	1	1	1	0	1
222448	1	1	1	1	1	1	1	1	1	1	1
222470	1	1	1	1	1	1	0	0	1	1	1
222700	1	1	1	1	1	1	1	1	1	1	1
222765	1	1	1	1	1	1	1	1	1	1	1
222800	1	1	1	1	1	1	1	1	1	1	1
222900	1	1	1	1	1	1	1	1	1	1	1
223000	1	1	1	1	1	1	1	1	1	0	1
223800	1	1	1	1	1	1	1	0	1	0	0
223900	1	1	1	1	1	1	1	1	1	0	0
224100	1	1	1	1	1	1	1	0	1	1	1
224120	1	1	1	1	1	1	0	1	1	0	0
224230	1	1	1	1	1	1	1	1	1	0	1
224690	1	1	1	1	1	1	1	1	1	1	1
224900	1	1	1	1	1	1	1	1	1	1	1
225280	1	1	1	1	1	1	1	1	1	1	1
225300	1	1	1	1	1	1	1	1	1	1	1
225400	1	1	1	1	1	1	1	1	1	1	1
225500	1	1	1	1	1	1	1	1	1	0	0
225750	1	1	1	1	1	1	1	0	1	0	1
225753	1	1	1	1	1	1	1	1	1	0	0
226600	1	1	1	1	1	1	1	1	1	1	0
226650	1	1	1	1	1	1	1	1	1	1	1
226700	1	1	1	1	1	1	1	1	1	1	1
226730	1	1	1	1	1	1	1	1	1	1	1
226900	1	1	1	1	1	1	1	1	1	1	0
226980	1	1	1	1	1	1	1	1	1	1	1
227400	1	1	1	1	1	1	1	1	1	1	1
227500	1	1	1	1	1	1	1	1	1	1	1
227600	1	1	1	1	1	1	1	1	1	1	1
227650	1	1	1	1	1	1	1	1	1	0	0
227810	1	1	1	1	1	1	1	1	1	1	1
228000	1	1	1	1	1	1	1	1	1	0	1
228300	1	1	1	1	1	1	1	1	1	1	1
228520	1	1	1	1	1	1	1	1	1	1	1
228600	1	1	1	1	1	1	1	1	1	1	0
228900	1	1	1	1	1	1	1	1	1	1	1
228930	1	1	1	1	1	1	1	1	1	1	1
228980	1	1	1	1	1	1	1	1	1	1	1
229050	1	1	1	1	1	1	1	0	1	1	1
229070	1	1	1	1	1	1	1	1	1	1	1
229100	1	1	1	1	1	1	1	1	1	0	1
229300	1	1	1	1	1	1	1	1	1	0	0
229600	1	1	1	1	1	1	1	1	1	0	1
229800	1	1	1	1	1	1	1	1	1	0	1
230000	1	1	1	1	1	1	1	1	1	0	1
230200	1	1	1	1	1	1	1	1	1	1	1
230350	1	1	1	1	1	1	1	0	1	1	1
230400	1	1	1	1	1	1	1	1	1	0	1
230450	1	1	1	1	1	1	1	1	1	0	1
230500	1	1	1	1	1	1	1	1	1	0	1
230600	1	1	1	1	1	1	1	1	1	0	1
230650	1	1	1	1	1	1	1	1	1	0	1
230800	1	1	1	1	1	1	1	1	1	0	1
230900	1	1	1	1	1	1	1	1	1	0	1
231000	1	1	1	1	1	1	1	1	1	0	1
231050	1	1	1	1	1	1	1	0	1	1	0
231090	1	1	1	1	1	1	0	0	1	1	0
231095	1	1	1	1	1	1	1	1	1	1	1
231200	1	1	1	1	1	1	1	1	1	1	1
231300	1	1	1	1	1	1	1	1	1	1	0
231530	1	1	1	1	1	1	1	1	1	0	1
231550	1	1	1	1	1	1	1	1	1	1	1
231670	1	1	1	1	1	1	1	1	1	1	1
231680	1	1	1	1	1	1	1	1	1	0	0
231690	1	1	1	1	1	1	0	0	0	0	0
232300	1	1	1	1	1	1	1	1	1	1	1
232500	1	1	1	1	1	1	1	1	1	1	1
232700	1	1	1	1	1	1	1	1	1	0	1
233100	1	1	1	1	1	1	1	0	1	1	0
233300	1	1	1	1	1	1	1	1	1	1	1
233400	1	1	1	1	1	1	1	1	1	1	1
233420	1	1	1	1	1	1	1	1	1	0	1
233910	1	1	1	1	1	1	1	1	1	0	1
234000	1	1	1	1	1	1	1	1	1	1	1
234100	1	1	1	1	1	1	1	1	1	1	1
234200	1	1	1	1	1	1	1	1	1	0	1
234500	1	1	1	1	1	1	1	1	1	1	1
235200	1	1	1	1	1	1	1	1	1	1	0
235400	1	1	1	1	1	1	1	1	1	1	1
235510	1	1	1	1	1	1	1	0	1	1	0
235555	1	1	1	1	1	1	1	1	1	1	1
235700	1	1	1	1	1	1	1	0	1	1	1
235730	1	1	1	1	1	1	1	1	1	1	0
235800	1	1	1	1	1	1	1	1	1	0	1
236200	1	1	1	1	1	1	1	1	1	1	1
236250	1	1	1	1	1	1	1	1	1	0	1
236270	1	1	1	1	1	1	1	1	1	1	0
236490	1	1	1	1	1	1	1	1	1	1	0
236670	1	1	1	1	1	1	1	1	1	1	1
236680	1	1	1	1	1	1	0	0	1	0	0
236700	1	1	1	1	1	1	1	1	1	1	0
236792	1	1	1	1	1	1	1	0	1	1	1
237300	1	1	1	1	1	1	1	1	1	1	1
237310	1	1	1	1	1	1	1	1	1	0	1
237500	1	1	1	1	1	1	1	1	1	1	1
237900	1	1	1	1	1	1	1	1	1	1	1
238320	1	1	1	1	1	1	1	1	1	1	1
238600	1	1	1	1	1	1	1	1	1	1	1
238970	1	1	1	1	1	1	1	1	1	1	0
239200	1	1	1	1	1	1	1	1	1	1	0
239300	1	1	1	1	1	1	1	1	1	0	1
239500	1	1	1	1	1	1	1	1	1	0	1
239510	1	1	1	0	1	1	1	1	1	1	1
239850	1	1	1	1	1	1	1	1	1	1	1
240300	1	1	1	1	1	1	1	1	1	1	1
240500	1	1	1	1	1	1	1	1	1	0	1
240600	1	1	1	1	1	1	1	1	1	0	1
240900	1	1	1	1	1	1	1	1	1	1	1
241200	1	1	1	1	1	1	1	1	1	1	1
241530	1	1	1	1	1	1	1	1	1	0	0
241550	1	1	1	1	1	1	1	1	1	1	1
241600	1	1	1	1	1	1	1	1	1	1	1
241850	1	1	1	1	1	1	1	1	1	1	0
242100	1	1	1	1	1	1	1	1	1	1	1
242300	1	1	1	1	1	1	1	1	1	1	0
242500	1	1	1	1	1	1	1	0	1	1	1
242600	1	1	1	1	1	1	1	1	1	1	0
242860	1	1	1	1	1	1	1	1	1	1	1
242900	1	1	1	1	1	1	1	1	1	1	0
243300	1	1	1	1	1	1	1	1	1	1	0
243310	1	1	1	1	1	1	1	1	1	1	1
243500	1	1	1	1	1	1	1	1	1	1	1
243700	1	1	1	1	1	1	1	0	1	1	0
243800	1	1	1	1	1	1	1	0	1	1	0
244200	1	1	1	1	1	1	1	1	1	1	0
244400	1	1	1	1	1	1	1	1	1	1	1
245000	1	1	1	1	1	1	1	1	1	1	1
245200	1	1	1	1	1	1	1	1	1	0	1
245340	1	1	1	1	1	1	1	1	1	1	0
245400	1	1	1	1	1	1	1	1	1	0	1
245590	1	1	1	1	1	1	1	1	1	1	1
245600	1	1	1	1	1	1	1	1	1	0	1
245900	1	1	1	1	1	1	1	1	1	0	1
246200	1	1	1	1	1	1	1	1	1	1	1
246450	1	1	1	1	1	1	1	1	1	0	1
247100	1	1	1	1	1	1	1	1	1	0	0
248190	1	1	1	1	1	1	1	1	1	1	1
248200	1	1	1	1	1	1	1	1	1	1	1
248250	1	1	1	1	1	1	1	1	1	1	1
248300	1	1	1	1	1	1	1	1	1	1	0
248370	1	1	1	1	1	1	1	1	1	1	1
248390	1	1	1	1	1	1	1	1	1	0	1
248450	1	1	1	1	1	1	1	0	1	1	0
248600	1	1	1	1	1	1	1	1	1	1	1
249000	1	1	1	1	1	1	1	1	1	0	0
249100	1	1	1	1	1	1	1	1	1	1	1
249270	1	1	1	1	1	1	1	0	1	0	1
249420	1	1	1	1	1	1	1	0	1	1	0
249700	1	1	1	1	1	1	1	1	1	1	0
249900	1	1	1	1	1	1	1	1	1	1	1
250100	1	1	1	1	1	1	1	1	1	1	1
250620	1	1	1	1	1	1	1	1	1	0	1
250800	1	1	1	1	1	1	1	1	1	1	1
250850	1	1	1	1	1	1	1	1	1	0	1
250940	1	1	1	1	1	1	1	1	1	0	1
250950	1	1	1	1	1	1	1	1	1	1	1
251000	1	1	1	1	1	1	1	1	1	0	1
251100	1	1	1	1	1	1	1	1	1	0	0
251110	1	1	1	1	1	1	1	1	1	0	1
251200	1	1	1	1	1	1	0	1	1	1	0
251290	1	1	1	1	1	1	1	1	1	1	1
251450	1	1	1	1	1	1	1	1	1	0	1
251880	1	1	1	1	1	1	1	1	1	0	1
252010	1	1	1	1	1	1	1	1	1	1	1
252011	1	1	1	1	1	1	1	1	1	1	1
252150	1	1	1	1	1	1	1	1	1	1	1
252500	1	1	1	1	1	1	1	1	1	1	1
252600	1	1	1	1	1	1	1	1	1	1	1
252650	1	1	1	1	1	1	1	0	1	1	1
252900	1	1	1	1	1	1	1	1	1	1	1
252920	1	1	1	1	1	1	1	1	1	0	1
252930	1	1	1	1	1	1	1	1	1	0	1
252940	1	1	1	1	1	1	1	1	1	1	1
253000	1	1	1	1	1	1	1	1	1	1	1
253010	1	1	1	1	1	1	1	1	1	0	1
253200	1	1	1	1	1	1	1	1	1	1	1
253220	1	1	1	1	1	1	1	1	1	0	1
253250	1	1	1	1	1	1	1	0	1	1	1
253270	1	1	1	1	1	1	1	1	1	0	1
253280	1	1	1	1	1	1	1	1	1	0	1
253290	1	1	1	1	1	1	1	1	1	1	1
253310	1	1	1	1	1	1	1	1	1	0	0
253600	1	1	1	1	1	1	1	1	1	1	0
253601	1	1	1	1	1	1	1	1	1	1	0
253700	1	1	1	1	1	1	1	1	1	0	1
253800	1	1	1	1	1	1	1	1	1	0	0
254090	1	1	1	1	1	1	1	1	1	1	1
254110	1	1	1	1	1	1	1	1	1	1	1
254130	1	1	1	1	1	1	1	1	1	1	0
254210	1	1	1	1	1	1	1	1	1	1	1
254300	1	1	1	0	1	1	1	1	1	1	0
254450	1	1	1	1	1	1	1	1	1	1	1
254600	1	1	1	1	1	1	1	1	1	1	1
254770	1	1	1	1	1	1	0	1	1	0	0
254780	1	1	1	1	1	1	1	1	1	1	1
254800	1	1	1	1	1	1	1	1	1	1	0
254900	1	1	1	1	1	1	1	0	1	0	1
255110	1	1	1	1	1	1	1	1	1	1	1
255120	1	1	1	1	1	1	1	1	1	1	1
255200	1	1	1	1	1	1	1	1	1	1	0
255310	1	1	1	1	1	1	1	1	1	1	1
255320	1	1	1	1	1	1	1	1	1	1	1
255700	1	1	1	1	1	1	1	1	1	1	0
255800	1	1	1	1	1	1	1	1	1	1	1
256000	1	1	1	1	1	1	1	1	1	0	1
256040	1	1	1	1	1	1	1	1	1	1	1
256050	1	1	1	1	1	1	1	1	1	1	0
256100	1	1	1	1	1	1	1	1	1	1	0
256300	1	1	1	1	1	1	1	1	1	1	0
256370	1	1	1	1	1	1	1	1	1	1	0
256450	1	1	1	1	1	1	1	1	1	1	1
256550	1	1	1	1	1	1	1	1	1	0	1
256600	1	1	1	1	1	1	1	1	1	1	1
256730	1	1	1	1	1	1	1	1	1	0	1
256731	1	1	1	1	1	1	1	1	1	0	1
256800	1	1	1	1	1	1	1	1	1	1	1
256810	1	1	1	1	1	1	1	1	1	0	1
256840	1	1	1	1	1	1	1	1	1	1	0
256850	1	1	1	1	1	1	1	1	1	1	0
257200	1	1	1	1	1	1	1	1	1	1	1
257220	1	1	1	1	1	1	1	1	1	1	1
257270	1	1	1	1	1	1	1	1	1	1	1
257300	1	1	1	1	1	1	1	1	1	1	1
257980	1	1	1	1	1	1	1	1	1	1	1
258450	1	1	1	1	1	1	1	1	1	0	1
258870	1	1	1	1	1	1	1	1	1	1	1
258900	1	1	1	1	1	1	1	1	0	0	1
259100	1	1	1	1	1	1	1	1	1	1	0
259420	1	1	1	1	1	1	1	1	1	1	1
259440	1	1	1	1	1	1	1	1	1	1	0
259600	1	1	1	1	1	1	1	1	1	1	1
259700	1	1	1	1	1	1	1	1	1	0	1
259710	1	1	1	1	1	1	1	1	1	1	1
259730	1	1	1	1	1	1	1	1	1	1	1
259770	1	1	1	1	1	1	1	1	1	1	1
259775	1	1	1	1	1	1	1	0	1	0	0
259900	1	1	1	1	1	1	1	1	1	1	1
260300	1	1	1	1	1	1	1	1	1	1	0
260400	1	1	1	1	1	1	1	0	1	0	1
260920	1	1	1	1	1	1	1	1	1	1	1
261000	1	1	1	1	1	1	1	1	1	0	1
261100	1	1	1	1	1	1	1	1	1	1	1
261500	1	1	1	1	1	1	1	1	1	1	1
261515	1	1	1	1	1	1	1	1	1	1	1
261550	1	1	1	1	1	1	1	1	1	1	1
261600	1	1	1	1	1	1	1	1	1	0	1
261630	1	1	1	1	1	1	1	1	1	1	1
261670	1	1	1	1	1	1	1	1	1	1	1
261740	1	1	1	1	1	1	1	1	1	1	1
261750	1	1	1	1	1	1	1	1	1	0	1
262000	1	1	1	1	1	1	1	1	1	1	0
262190	1	1	1	1	1	1	1	1	1	1	1
262300	1	1	1	1	1	1	1	1	1	1	0
262500	1	1	1	1	1	1	1	1	1	1	1
262600	1	1	1	1	1	1	1	1	1	1	0
262650	1	1	1	1	1	1	1	1	1	1	1
262700	1	1	1	1	1	1	1	1	1	1	0
262850	0	1	1	1	1	1	1	1	1	1	1
263200	1	1	1	1	1	1	1	1	1	1	0
263300	1	1	1	1	1	1	1	1	1	1	1
263400	1	1	1	1	1	1	1	1	1	0	1
263510	1	1	1	1	1	1	1	1	1	1	1
263570	1	1	1	1	1	1	1	1	1	1	1
263700	1	1	1	1	1	1	1	1	1	0	1
263750	1	1	1	1	1	1	1	1	1	0	1
263800	1	1	1	1	1	1	1	1	1	1	0
264070	1	1	1	1	1	1	1	1	1	0	0
264300	1	1	1	1	1	1	1	1	1	1	1
264350	1	1	1	1	1	1	1	1	1	0	1
264470	1	1	1	1	1	1	1	1	1	1	1
264700	1	1	1	1	1	1	1	1	1	1	1
264800	1	1	1	1	1	1	1	1	1	1	1
265000	1	1	1	1	1	1	1	1	1	1	1
265050	1	1	1	1	1	1	1	0	1	1	1
265100	1	1	1	1	1	1	1	1	1	0	1
265120	1	1	1	1	1	1	1	1	1	1	0
265800	1	1	1	1	1	1	1	1	1	1	1
266100	1	1	1	1	1	1	1	1	1	1	1
266120	1	1	1	1	1	1	1	1	1	0	1
266130	1	1	1	1	1	1	1	1	1	0	1
266140	1	1	1	1	1	1	1	1	1	1	0
266150	1	1	1	1	1	1	1	1	1	1	1
266200	1	1	1	1	1	1	1	0	1	0	1
266265	1	1	1	1	1	1	1	0	1	1	0
266500	1	1	1	1	1	1	1	1	1	1	1
266510	1	1	1	1	1	1	1	1	1	1	1
266920	1	1	1	1	1	1	1	0	1	1	0
267000	1	1	1	1	1	1	1	0	1	0	0
267300	1	1	1	1	1	1	1	1	1	1	1
267430	1	1	1	1	1	1	1	1	1	1	1
267500	1	1	1	1	1	1	1	1	1	1	1
268000	1	1	1	1	1	1	1	1	1	1	0
268130	1	1	1	1	1	1	1	1	1	0	0
268150	1	1	1	1	1	1	1	1	1	1	0
268300	1	1	1	1	1	1	1	1	1	0	0
268310	1	1	1	1	1	1	1	1	1	1	0
268800	1	1	1	1	1	1	1	1	1	0	1
269150	1	1	1	1	1	1	0	1	1	0	0
269500	1	1	1	1	1	1	1	1	1	0	0
269700	1	1	1	1	1	1	1	1	1	0	0
269920	1	1	1	1	1	1	1	1	1	1	1
269921	1	1	1	1	1	1	1	1	1	0	1
270100	1	1	1	1	1	1	1	1	1	1	1
270200	1	1	1	1	1	1	1	1	1	1	1
270300	1	1	1	1	1	1	1	1	1	1	0
270400	1	1	1	1	1	1	1	1	1	0	1
270420	1	1	1	1	1	1	1	1	1	1	0
270450	1	1	1	1	1	1	1	1	1	1	1
270550	1	1	1	1	1	1	1	0	1	1	0
270685	1	1	1	1	1	1	1	1	1	0	0
270800	1	1	1	1	1	1	1	1	1	1	1
271665	1	1	1	1	1	1	1	1	1	1	0
271900	1	1	1	1	1	1	1	0	1	0	1
271930	1	1	1	1	1	1	1	1	1	0	1
272120	1	1	1	1	1	1	1	1	1	1	1
272200	1	1	1	1	1	1	1	1	1	0	1
272300	1	1	1	1	1	1	1	1	1	1	1
272430	1	1	1	1	1	1	1	1	1	1	0
272750	1	1	1	1	1	1	1	1	1	0	1
272800	1	1	1	1	1	1	1	1	1	0	1
273300	1	1	1	1	1	1	1	1	1	1	1
273750	1	1	1	1	1	1	1	1	1	1	1
273800	1	1	1	1	1	1	1	1	1	1	1
274150	1	1	1	1	1	1	1	1	1	1	0
274400	1	1	1	1	1	1	1	1	1	1	0
274500	1	1	1	1	1	1	1	1	1	1	1
274600	1	1	1	1	1	1	1	1	1	1	0
274800	1	1	1	1	1	1	1	0	1	0	0
275200	1	1	1	1	1	1	1	1	1	1	1
275630	1	1	1	1	1	1	1	1	1	1	0
276300	1	1	1	1	1	1	1	1	1	1	1
276600	1	1	1	1	1	1	1	1	1	1	1
276700	1	1	1	1	1	1	1	1	1	0	1
276710	1	1	1	1	1	1	1	1	1	0	1
276820	1	1	1	1	1	1	1	1	1	1	1
276880	1	1	1	1	1	1	1	1	1	0	1
276900	1	1	1	1	1	1	1	1	1	1	0
276901	1	1	1	1	1	1	1	1	1	1	0
276902	1	1	1	1	1	1	1	1	1	1	0
277000	1	1	1	1	1	1	1	1	1	1	1
277180	1	1	1	1	1	1	1	1	1	1	1
277300	1	1	1	1	1	1	1	1	1	1	1
277400	1	1	1	1	1	1	1	0	1	0	1
277410	1	1	1	1	1	1	1	1	1	0	0
277440	1	1	1	1	1	1	1	1	1	1	1
277450	1	1	1	1	1	1	1	1	1	0	0
277460	1	1	1	1	1	1	1	1	1	1	0
277470	1	1	1	1	1	1	1	1	1	0	0
277480	1	1	1	1	1	1	1	1	1	1	1
277580	1	1	1	1	1	1	1	1	1	1	1
277590	1	1	1	1	1	1	1	0	1	1	1
277600	1	1	1	1	1	1	1	0	1	1	0
277610	1	1	1	1	1	1	1	0	1	1	1
277700	1	1	1	1	1	1	1	1	1	1	0
277900	1	1	1	1	1	1	1	1	1	1	0
278000	1	1	1	1	1	1	1	1	1	1	1
278150	1	1	1	1	1	1	1	1	1	1	1
278300	1	1	1	1	1	1	1	1	1	0	1
278700	1	1	1	1	1	1	1	1	1	0	1
278720	1	1	1	1	1	1	1	1	1	0	1
278730	1	1	1	1	1	1	1	1	1	0	1
278740	1	1	1	1	1	1	1	1	1	1	1
278750	1	1	1	1	1	1	1	1	1	0	0
278760	1	1	1	1	1	1	1	1	1	0	1
278780	1	1	1	1	1	1	1	1	1	1	0
280000	1	1	1	1	1	1	1	1	1	0	1
300000	1	1	1	1	1	1	1	1	1	1	1
300004	1	1	1	1	1	1	1	1	1	1	0
300009	1	1	1	1	1	1	1	1	1	1	0
300049	1	1	1	1	1	1	1	1	1	1	1
300055	1	1	1	1	1	1	1	1	1	1	0
300067	1	1	1	1	1	1	1	1	1	1	0
300068	1	1	1	1	1	1	1	1	1	1	1
300071	1	1	1	1	1	1	1	1	1	1	1
300088	1	1	1	1	1	1	1	0	1	1	0
300100	1	1	1	1	1	1	1	1	1	1	1
300166	1	1	0	1	1	1	1	1	1	1	0
300200	1	1	1	1	1	1	1	1	1	1	0
300215	1	1	1	1	1	1	1	1	1	1	0
300240	1	1	1	1	1	1	1	1	1	0	0
300257	1	1	1	1	1	1	1	1	1	0	1
300263	1	1	1	1	1	1	1	1	1	1	0
300291	1	1	1	1	1	1	1	1	1	0	1
300299	1	1	1	1	1	1	1	1	1	1	1
300321	1	1	1	1	1	1	1	1	1	1	1
300322	1	1	1	1	1	1	1	1	1	1	1
300323	1	1	1	1	1	1	1	1	1	1	1
300352	1	1	1	1	1	1	1	1	1	1	0
300354	1	1	1	1	1	1	1	1	1	1	1
300367	1	1	1	1	1	1	1	1	1	1	0
300376	1	1	1	1	1	1	1	1	1	1	1
300387	1	1	1	1	1	1	1	1	1	1	1
300388	1	1	1	1	1	1	1	1	1	1	0
300400	1	1	1	1	1	1	1	0	1	1	1
300419	1	1	1	1	1	1	1	1	1	1	0
300434	1	1	1	1	1	1	1	0	1	1	0
300438	1	1	1	1	1	1	1	1	1	1	1
300489	1	1	1	1	1	1	1	1	1	1	1
300498	1	1	1	1	1	1	1	0	1	1	0
300500	1	1	1	1	1	1	1	1	1	0	0
300510	1	1	1	1	1	1	1	1	1	1	0
301000	1	1	1	1	1	1	1	1	1	1	1
301040	1	1	1	1	1	1	1	1	1	1	0
301050	1	1	1	1	1	1	1	1	1	1	1
301200	1	1	1	1	1	1	1	1	1	0	0
301310	1	1	1	1	1	1	1	0	1	1	1
301500	1	1	1	1	1	1	1	1	1	0	1
301830	1	1	1	1	1	1	1	1	1	1	1
301835	1	1	1	1	1	1	1	1	1	1	1
301900	1	1	1	1	1	1	1	0	1	1	0
302045	1	1	1	1	1	1	1	1	1	1	1
302060	1	1	1	1	1	1	1	1	1	1	1
302800	1	1	1	1	1	1	1	1	1	1	0
302950	1	1	1	1	1	1	1	1	1	1	0
302960	1	1	1	1	1	1	1	1	1	0	1
303100	1	1	1	1	1	1	1	1	1	0	0
303350	1	1	1	1	1	1	1	1	1	1	1
303400	1	1	1	1	1	1	1	0	1	1	0
303600	1	1	1	1	1	1	1	1	1	1	1
303700	1	1	1	1	1	1	1	0	1	1	0
303800	1	1	1	1	1	1	1	0	1	1	0
303900	1	1	1	1	1	1	1	0	1	1	0
304110	1	1	1	1	1	1	1	1	1	1	1
304120	1	1	1	1	1	1	1	1	1	1	1
304150	1	1	1	1	1	1	1	1	1	1	1
304400	1	1	1	1	1	1	1	1	1	1	0
304500	1	1	1	1	1	1	1	1	1	1	1
304700	1	1	1	1	1	1	1	1	1	1	0
304790	1	1	1	1	1	1	1	1	1	1	0
304800	1	1	1	1	1	1	1	1	1	1	1
305000	1	1	1	1	1	1	1	1	1	0	0
305100	1	1	1	1	1	1	1	1	1	1	1
305390	1	1	1	1	1	1	1	1	1	1	0
305400	1	1	1	1	1	1	1	1	1	1	1
305450	1	1	1	1	1	1	1	1	1	0	0
305600	1	1	1	1	1	1	1	1	1	1	1
305620	1	1	1	1	1	1	1	1	1	1	1
306400	1	1	1	1	1	1	1	1	1	1	1
306700	1	1	1	1	1	1	1	1	1	1	1
306900	1	1	1	1	1	1	1	1	1	1	1
306955	1	1	1	1	1	1	1	1	1	1	0
307000	1	1	1	1	1	1	1	1	1	1	1
307030	1	1	1	1	1	1	1	1	1	1	1
307800	1	1	1	1	1	1	1	1	1	1	0
308050	1	1	1	1	1	1	1	1	1	1	1
308100	1	1	1	1	1	1	1	1	1	1	1
308205	1	1	1	1	1	1	1	1	1	0	1
308230	1	1	1	1	1	1	1	1	1	1	1
308240	1	1	1	1	1	1	1	1	1	1	1
308300	1	1	1	1	1	1	1	1	1	0	1
308350	1	1	1	1	1	1	1	1	1	1	0
308700	1	1	1	1	1	1	1	1	1	1	0
308800	1	1	1	1	1	1	1	1	1	0	1
308930	1	1	1	1	1	1	1	1	1	1	1
309000	1	1	1	1	1	1	1	1	1	1	1
309300	1	1	1	1	1	1	1	0	1	1	0
309350	1	1	1	1	1	1	1	1	1	1	1
309400	1	1	1	1	1	1	1	1	1	1	1
309520	1	1	1	1	1	1	1	1	1	0	0
309580	1	1	1	1	1	1	1	1	1	1	0
309801	1	1	1	1	1	1	1	1	1	0	1
309900	1	1	1	1	1	1	1	1	1	1	1
310200	1	1	1	1	1	1	1	1	1	1	1
310300	1	1	1	1	1	1	1	1	1	1	1
310400	1	1	1	1	1	1	1	1	1	1	0
310468	1	1	1	1	1	1	1	1	1	1	0
310500	1	1	1	1	1	1	1	1	1	1	0
310600	1	1	1	1	1	1	1	1	1	1	0
310700	1	1	1	1	1	1	1	0	1	1	0
311070	1	1	1	1	1	1	1	1	1	1	1
311200	1	1	1	1	1	1	1	1	1	0	0
311250	1	1	1	1	1	1	1	1	1	0	1
311300	1	1	1	1	1	1	1	1	1	1	1
312060	1	1	1	1	1	1	1	1	1	1	0
312080	1	1	1	1	1	1	1	1	1	0	0
312300	1	1	1	1	1	1	1	1	1	1	1
312600	1	1	1	1	1	1	1	1	1	0	0
312700	1	1	1	1	1	1	1	1	1	1	0
312750	1	1	1	1	1	1	1	1	1	1	0
312863	1	1	1	1	1	1	1	0	1	1	1
312870	1	1	1	1	1	1	1	1	1	1	0
312920	1	1	1	1	1	1	1	1	1	0	0
313400	1	1	1	1	1	1	1	0	0	0	0
313500	1	1	1	1	1	1	1	1	1	1	1
313900	1	1	1	1	1	1	1	1	1	1	1
314050	1	1	1	1	1	1	1	1	1	1	0
314200	1	1	1	1	1	1	1	0	1	1	0
314400	1	1	1	1	1	1	1	1	1	1	1
600059	1	1	1	1	1	1	1	1	1	1	1
600060	1	1	1	0	1	1	1	1	1	1	0
600072	1	1	1	1	1	1	1	0	1	0	1
600081	1	1	1	1	1	1	1	0	1	1	1
600101	1	1	1	1	1	1	1	1	1	1	0
600105	1	1	1	1	1	1	1	1	1	1	0
600116	1	1	1	1	1	1	1	1	1	1	1
600121	1	1	1	1	1	1	1	1	1	0	1
600132	1	1	1	1	1	1	1	1	1	1	0
600138	1	1	1	1	1	1	1	1	1	0	1
600143	1	1	1	1	1	1	1	1	1	1	0
600145	1	1	1	1	1	1	1	1	1	0	1
600155	1	1	1	1	1	1	1	1	1	1	1
600195	1	1	1	1	1	1	1	1	1	1	1
600208	1	1	1	1	1	1	1	1	1	1	1
600224	1	1	1	1	1	1	1	1	1	1	0
600251	1	1	1	1	1	1	1	0	1	1	0
600274	1	1	1	1	1	1	1	1	1	0	1
600309	1	1	1	1	1	1	1	1	1	1	1
600316	1	1	1	1	1	1	1	1	1	1	0
600334	1	1	1	1	1	1	1	0	1	1	1
600363	1	1	1	1	1	1	1	1	1	1	0
600376	1	1	1	1	1	1	1	0	1	1	0
600462	1	1	1	1	1	1	1	0	1	0	0
600496	1	1	1	1	1	1	1	1	1	1	1
600512	1	1	1	1	1	1	1	1	1	1	0
600513	1	1	1	1	1	1	1	1	1	1	1
600625	1	1	1	1	1	1	1	1	1	1	1
600628	1	1	1	1	1	1	0	0	1	1	0
600652	1	1	1	1	1	1	1	1	1	1	1
600721	1	1	1	1	1	1	1	0	1	0	0
600737	1	1	1	1	1	1	1	1	1	0	1
600791	1	1	1	1	1	1	1	1	1	1	0
600794	1	1	1	1	1	1	1	1	1	1	1
600795	1	1	1	1	1	1	1	1	1	1	1
600802	1	1	1	1	1	1	1	1	1	1	1
600803	1	1	1	1	1	1	1	1	1	1	1
600852	1	1	1	1	1	1	1	1	1	1	1
600858	1	1	1	1	1	1	1	1	1	1	1
600882	1	1	1	1	1	1	1	1	1	1	1
600920	1	1	1	1	1	1	1	0	1	1	0
600955	1	1	1	1	1	1	1	1	1	1	0
600962	1	1	1	1	1	1	1	1	1	1	0
600965	1	1	1	1	1	1	1	1	1	0	1
600971	1	1	1	1	1	1	1	0	1	0	0
600972	1	1	1	1	1	1	1	1	1	1	0
600974	1	1	1	1	1	1	1	0	1	1	0
600977	1	1	1	1	1	1	1	1	1	1	0
600995	1	1	1	1	1	1	1	1	1	1	0
600996	1	1	1	1	1	1	1	1	1	1	1
601001	1	1	1	1	1	1	1	1	1	1	0
601003	1	1	1	1	1	1	1	1	1	1	1
601005	1	1	1	1	1	1	1	1	1	1	1
601067	1	1	1	1	1	1	1	1	1	1	0
601071	1	1	1	1	1	1	1	1	1	1	0
601098	1	1	1	1	1	1	1	0	1	0	0
601104	1	1	1	1	1	1	1	0	1	0	1
601110	1	1	1	1	1	1	1	1	1	0	1
601144	1	1	1	1	1	1	1	1	1	1	0
601152	1	1	1	1	1	1	1	1	1	1	0
601186	1	1	1	1	1	1	1	1	1	0	0
601200	1	1	1	1	1	1	1	1	1	1	0
601238	1	1	1	1	1	1	1	0	1	1	0
601277	1	1	1	1	1	1	1	0	1	1	1
601286	1	1	1	1	1	1	1	0	1	1	0
601287	1	1	1	1	1	1	1	1	1	0	1
601317	1	1	1	1	1	1	1	1	1	1	0
601321	1	1	1	1	1	1	1	1	1	1	1
601331	1	1	1	1	1	1	1	0	1	1	0
601346	1	1	1	1	1	1	1	0	1	1	0
601358	1	1	1	1	1	1	1	1	1	1	0
601369	1	1	1	1	1	1	1	1	1	1	0
601378	1	1	1	1	1	1	1	1	1	1	0
601382	1	1	1	1	1	1	1	1	1	1	1
601386	1	1	1	1	1	1	1	1	1	1	0
601399	1	1	1	1	1	1	1	1	1	0	0
601414	1	1	1	1	1	1	1	1	1	1	1
601419	1	1	1	1	1	1	1	1	1	1	1
601457	1	1	1	1	1	1	1	1	1	1	1
601462	1	1	1	1	1	1	1	1	1	1	1
601472	1	1	1	1	1	1	1	1	1	1	1
601492	1	1	1	1	1	1	1	1	1	1	1
601494	1	1	1	1	1	1	1	0	1	1	1
601543	1	1	1	1	1	1	1	0	1	1	0
601544	1	1	1	1	1	1	1	1	1	1	0
601553	1	1	1	1	1	1	1	1	1	1	1
601559	1	1	1	1	1	1	1	1	1	1	1
601596	1	1	1	1	1	1	1	1	1	1	0
601626	1	1	1	1	1	1	1	1	1	1	1
601631	1	1	1	1	1	1	1	1	1	1	0
601665	1	1	1	1	1	1	1	1	1	1	1
601675	1	1	1	1	1	1	1	1	1	1	1
601678	1	1	1	1	1	1	1	1	1	1	0
601680	1	1	1	1	1	1	1	1	1	1	1
601776	1	1	1	1	1	1	1	1	1	1	1
601777	1	1	1	1	1	1	1	1	1	1	1
601780	1	1	1	1	1	1	1	1	1	0	0
601813	1	1	1	1	1	1	1	1	1	1	1
601815	1	1	1	1	1	1	1	1	1	0	1
601847	1	1	1	1	1	1	1	1	1	1	1
601859	1	1	1	1	1	1	1	1	1	1	1
601868	1	1	1	1	1	1	1	0	1	1	1
601869	1	1	1	1	1	1	0	1	1	1	0
601884	1	1	1	1	1	1	1	1	1	1	1
601885	1	1	1	1	1	1	1	1	1	1	0
601894	1	1	1	1	1	1	1	1	1	1	1
601977	1	1	1	1	1	1	1	1	1	1	1
602014	1	1	1	1	1	1	1	1	1	1	1
602032	1	1	1	1	1	1	1	0	1	1	0
602066	1	1	1	1	1	1	1	0	1	1	0
602078	1	1	1	1	1	1	1	1	1	1	0
602079	1	1	1	1	1	1	1	1	1	1	1
602080	1	1	1	1	1	1	1	1	1	1	1
602081	1	1	1	1	1	1	1	1	1	1	0
602082	1	1	1	1	1	1	1	1	1	0	0
602083	1	1	1	1	1	1	1	1	1	1	0
602088	1	1	1	1	1	1	1	1	1	1	0
602089	1	1	1	1	1	1	1	1	1	1	1
602093	1	1	1	1	1	1	1	1	1	1	1
602111	1	1	1	1	1	1	1	1	1	1	0
602347	1	1	1	1	1	1	1	1	1	1	1
602390	1	1	1	1	1	1	1	1	1	0	0
602398	1	1	1	1	1	1	1	1	1	0	1
602433	1	1	1	1	1	1	1	1	1	1	0
602459	1	1	1	1	1	1	1	1	1	1	0
602473	1	1	1	1	1	1	1	0	1	1	0
602475	1	1	1	1	1	1	1	1	1	1	1
602481	1	1	1	1	1	1	1	1	1	1	1
602482	1	1	1	1	1	1	1	1	1	1	0
602483	1	1	1	1	1	1	1	1	1	1	1
602485	1	1	1	1	1	1	1	1	1	1	1
602522	1	1	1	1	1	1	1	1	1	0	0
602579	1	1	1	1	1	1	1	1	1	0	1
602588	1	1	1	1	1	1	1	1	1	0	0
602629	1	1	1	1	1	1	1	1	1	1	0
602722	1	1	1	1	1	1	1	1	1	0	1
602723	1	1	1	1	1	1	1	1	1	1	0
602771	1	1	1	1	1	1	1	0	1	1	0
602772	1	1	1	1	1	1	1	0	1	1	0
602782	1	1	1	1	1	1	1	0	1	0	0
602849	1	1	1	1	1	1	1	1	1	1	1
602875	1	1	1	1	1	1	1	1	1	1	1
603034	1	1	1	1	1	1	1	1	1	1	0
603041	1	1	1	1	1	1	1	1	1	0	1
603278	1	1	1	1	1	1	1	1	1	1	1
603358	1	1	1	1	1	1	1	1	1	1	0
603373	1	1	1	1	1	1	1	1	1	1	1
603511	1	1	1	1	1	1	1	1	1	1	0
603513	1	1	1	1	1	1	1	1	1	1	1
603546	1	1	1	1	1	1	1	1	1	1	0
603553	1	1	1	1	1	1	1	1	1	1	1
603554	1	1	1	1	1	1	1	1	1	1	1
603563	1	1	1	1	1	1	1	1	1	0	0
603622	1	1	1	1	1	1	1	1	1	1	1
603649	1	1	1	1	1	1	1	1	1	1	0
603689	1	1	1	1	1	1	1	0	1	1	1
603776	1	1	1	1	1	1	1	1	1	1	0
603786	1	1	1	1	1	1	1	1	1	0	0
603830	1	1	1	1	1	1	1	1	1	1	0
603860	1	1	1	1	1	1	1	1	1	1	0
603896	1	1	1	1	1	1	1	1	1	1	1
603909	1	1	1	1	1	1	1	1	1	1	1
603956	1	1	1	1	1	1	1	1	1	1	1
604004	1	1	1	1	1	1	1	1	1	0	0
604091	1	1	1	1	1	1	1	1	1	1	1
604116	1	1	1	1	1	1	1	1	1	1	1
604145	1	1	1	1	1	1	1	0	1	1	1
604169	1	1	1	0	1	1	0	1	1	1	0
604187	1	1	1	1	1	1	1	1	1	1	0
604218	1	1	1	1	1	1	1	1	1	1	0
604219	1	1	1	1	1	1	1	1	1	1	1
604229	1	1	1	1	1	1	1	1	1	1	1
604233	1	1	1	1	1	1	1	1	1	1	0
604250	1	1	1	1	1	1	1	1	1	1	0
604271	1	1	1	1	1	1	1	1	1	1	1
604273	1	1	1	1	1	1	1	1	1	0	0
604278	1	1	1	1	1	1	1	1	1	1	1
604286	1	1	1	1	1	1	1	1	1	0	1
604292	1	1	1	1	1	1	1	1	1	1	0
604307	1	1	1	1	1	1	1	1	1	1	0
604317	1	1	1	1	1	1	1	0	1	1	0
604320	1	1	1	1	1	1	1	1	1	1	0
604321	1	1	1	1	1	1	1	1	1	0	0
604348	1	1	1	1	1	1	1	1	1	1	1
604356	1	1	1	1	1	1	1	1	1	1	0
604360	1	1	1	1	1	1	1	1	1	0	0
604367	1	1	1	1	1	1	1	1	1	1	1
604369	1	1	1	1	1	1	1	1	1	1	1
604370	1	1	1	1	1	1	1	1	1	1	1
604377	1	1	1	1	1	1	1	1	1	0	0
604379	1	1	1	1	1	1	1	1	1	1	0
604387	1	1	1	1	1	1	1	1	1	1	0
604391	1	1	1	1	1	1	1	1	1	1	1
604393	1	1	1	1	1	1	1	1	1	1	0
604400	1	1	1	1	1	1	0	0	1	0	0
604416	1	1	1	1	1	1	1	1	1	1	1
604559	1	1	1	1	1	1	1	0	1	1	0
604625	1	1	1	1	1	1	1	1	1	1	0
604715	1	1	1	1	1	1	1	1	1	1	0
604717	1	1	1	1	1	1	1	1	1	1	1
604757	1	1	1	1	1	1	1	1	1	1	0
604765	1	1	1	1	1	1	1	1	1	1	1
604772	1	1	1	1	1	1	1	1	1	1	1
604777	1	1	1	1	1	1	0	0	1	1	0
604805	1	1	1	1	1	1	1	0	1	1	0
604841	1	1	1	1	1	1	1	1	1	1	1
604901	1	1	1	1	1	1	1	0	1	1	1
605021	1	1	1	1	1	1	1	1	1	1	0
605027	1	1	1	1	1	1	1	1	1	1	1
605074	1	1	1	1	1	1	1	1	1	1	1
605249	1	1	1	1	1	1	1	1	1	1	1
605253	1	1	1	1	1	1	1	1	1	1	1
605258	1	1	1	1	1	1	1	1	1	1	1
605259	1	1	1	1	1	1	1	0	1	1	0
605280	1	1	1	1	1	1	1	1	1	1	1
605282	1	1	1	1	1	1	1	1	1	1	1
605289	1	1	1	1	1	1	1	1	1	1	0
605309	1	1	1	1	1	1	1	1	1	1	1
605361	1	1	1	1	1	1	1	1	1	1	1
605375	1	1	1	1	1	1	1	1	1	1	1
605376	1	1	1	1	1	1	1	0	1	0	0
605387	1	1	1	1	1	1	1	1	1	1	1
605389	1	1	1	1	1	1	1	0	1	0	0
605407	1	1	1	1	1	1	1	1	1	0	1
605462	1	1	1	1	1	1	1	1	1	1	1
605472	1	1	1	1	1	1	1	1	1	1	0
605479	1	1	1	1	1	1	1	1	1	1	1
605583	1	1	1	1	1	1	1	0	1	1	0
605588	1	1	1	1	1	1	1	1	1	1	1
605589	1	1	1	1	1	1	1	1	1	0	0
605594	1	1	1	1	1	1	1	1	1	0	0
605637	1	1	1	1	1	1	1	1	1	1	1
605711	1	1	1	1	1	1	1	1	1	0	0
605714	1	1	1	1	1	1	1	1	1	1	1
605724	1	1	1	1	1	1	1	1	1	0	1
605751	1	1	1	1	1	1	1	0	1	1	0
605814	1	1	1	1	1	1	1	1	1	1	0
605820	1	1	1	1	1	1	1	1	1	0	1
605850	1	1	1	1	1	1	1	1	1	1	1
605899	1	1	1	1	1	1	1	1	1	1	1
605911	1	1	1	1	1	1	1	1	1	0	1
606002	1	1	1	1	1	1	1	1	1	1	0
606054	1	1	1	1	1	1	1	1	1	1	1
606056	1	1	1	1	1	1	1	1	1	0	1
606069	1	1	1	1	1	1	1	1	1	0	1
606070	1	1	1	1	1	1	0	0	1	1	0
606071	1	1	1	1	1	1	1	1	1	1	0
606072	1	1	1	1	1	1	1	1	1	0	1
606159	1	1	1	1	1	1	1	1	1	0	1
606176	1	1	1	1	1	1	1	1	1	1	1
606324	1	1	1	1	1	1	1	1	1	0	1
606392	1	1	1	1	1	1	1	1	1	1	1
606394	1	1	1	1	1	1	1	1	1	1	1
606482	1	1	1	1	1	1	1	1	1	1	1
606574	1	1	1	1	1	1	1	1	1	1	0
606593	1	1	1	1	1	1	1	1	1	1	1
606595	1	1	1	1	1	1	1	1	1	1	1
606612	1	1	1	1	1	1	1	1	1	0	0
606664	1	1	1	1	1	1	1	1	1	0	1
606685	1	1	1	1	1	1	1	1	1	0	1
606690	1	1	1	1	1	1	1	1	1	1	1
606705	1	1	1	1	1	1	1	0	1	1	0
606713	1	1	1	1	1	1	0	0	1	1	0
606719	1	1	1	1	1	1	1	1	1	1	1
606762	1	1	1	1	1	1	1	1	1	0	1
606764	1	1	1	1	1	1	1	1	1	1	1
606777	1	1	1	1	1	1	1	1	1	1	1
606785	1	1	1	1	1	1	1	1	1	1	1
606812	1	1	1	1	1	1	1	1	1	0	1
606824	1	1	1	1	1	1	1	0	1	1	1
606835	1	1	1	1	1	1	1	1	1	1	0
606843	1	1	1	1	1	1	1	1	1	1	1
606854	1	1	1	1	1	1	1	0	1	1	0
606889	1	1	1	1	1	1	1	1	1	0	1
606937	1	1	1	1	1	1	1	0	1	0	0
606943	1	1	1	1	1	1	1	1	1	1	0
606952	1	1	1	1	1	1	1	1	1	0	1
606966	1	1	1	1	1	1	1	1	1	0	0
606996	1	1	1	1	1	1	1	1	1	0	0
607014	1	1	1	1	1	1	1	1	1	0	1
607015	1	1	1	1	1	1	1	1	1	0	1
607060	1	1	1	1	1	1	1	1	1	1	1
607078	1	1	1	1	1	1	1	1	1	1	0
607115	1	1	1	1	1	1	1	1	1	1	1
607143	1	1	1	1	1	1	1	0	1	0	1
607155	1	1	1	1	1	1	1	1	1	0	0
607196	1	1	1	1	1	1	1	1	1	1	0
607200	1	1	1	1	1	1	1	0	1	1	0
607208	1	1	1	1	1	1	1	1	1	1	0
607250	1	1	1	1	1	1	1	1	1	0	0
607259	1	1	1	1	1	1	1	1	1	1	0
607271	1	1	1	1	1	1	1	1	1	1	1
607313	1	1	1	1	1	1	1	0	1	1	1
607323	1	1	1	1	1	1	1	1	1	1	0
607326	1	1	1	1	1	1	1	0	1	0	0
607330	1	1	1	1	1	1	1	1	1	1	1
607361	1	1	1	1	1	1	1	1	1	0	0
607364	1	1	1	1	1	1	1	1	1	1	1
607371	1	1	1	1	1	1	1	1	1	1	1
607426	1	1	1	1	1	1	1	1	1	0	1
607432	1	1	1	1	1	1	1	1	1	1	1
607450	1	1	1	1	1	1	1	1	1	1	1
607459	1	1	1	1	1	1	1	1	1	0	1
607473	1	1	1	1	1	1	1	0	1	0	0
607475	1	1	1	1	1	1	1	1	1	1	0
607482	1	1	1	1	1	1	1	1	1	1	0
607485	1	1	1	1	1	1	1	1	1	0	0
607487	1	1	1	1	1	1	1	1	1	0	0
607541	1	1	1	1	1	1	1	1	1	0	0
607554	1	1	1	1	1	1	1	1	1	1	1
607595	1	1	1	1	1	1	1	1	1	1	1
607602	1	1	1	1	1	1	1	1	1	1	1
607616	1	1	1	1	1	1	1	1	1	1	1
607624	1	1	1	1	1	1	1	1	1	1	0
607625	1	1	1	1	1	1	1	1	1	0	1
607634	1	1	1	1	1	1	1	1	1	1	1
607641	1	1	1	1	1	1	1	1	1	1	1
607655	1	1	1	1	1	1	1	1	1	1	1
607677	1	1	1	1	1	1	1	1	1	1	1
607678	1	1	1	1	1	1	1	1	1	1	0
607681	1	1	1	1	1	1	1	1	1	1	1
607688	1	1	1	1	1	1	1	1	1	0	0
607694	1	1	1	1	1	1	1	1	1	0	1
607721	1	1	1	1	1	1	1	1	1	1	0
607736	1	1	1	1	1	1	1	1	1	1	1
607745	1	1	1	1	1	1	1	1	1	1	0
607748	1	1	1	1	1	1	1	1	1	1	1
607765	1	1	1	1	1	1	1	1	1	1	1
607778	1	1	1	1	1	1	1	1	1	0	1
607785	1	1	1	1	1	1	1	1	1	1	0
607801	1	1	1	1	1	1	1	1	1	0	1
607812	1	1	1	1	1	1	1	1	1	1	1
607822	1	1	1	1	1	1	1	1	1	0	1
607823	1	1	1	1	1	1	1	1	1	1	0
607831	1	1	1	1	1	1	1	1	1	1	0
607841	1	1	1	1	1	1	1	1	1	1	0
607847	1	1	1	1	1	1	1	1	1	1	0
607855	1	1	1	1	1	1	1	1	1	1	1
607932	1	1	1	1	1	1	1	1	1	1	1
607941	1	1	1	1	1	1	1	1	1	1	0
607944	1	1	1	1	1	1	1	1	1	1	1
608022	1	1	1	1	1	1	1	1	1	1	0
608030	1	1	1	1	1	1	1	1	1	1	0
608033	1	1	0	1	1	1	1	1	1	1	1
608051	1	1	1	1	1	1	1	1	1	0	0
608093	1	1	1	1	1	1	1	1	1	0	1
608097	1	1	1	1	1	1	1	1	1	1	0
608099	1	1	1	1	1	1	1	1	1	0	1
608104	1	1	1	1	1	1	1	1	1	0	1
608106	1	1	1	1	1	1	1	1	1	0	1
608115	1	1	1	1	1	1	1	1	1	1	1
608189	1	1	1	1	1	1	1	1	1	1	0
608194	1	1	1	1	1	1	1	1	1	0	0
608203	1	1	1	1	1	1	1	1	1	1	1
608233	1	1	1	1	1	1	1	1	1	1	1
608236	1	1	1	1	1	1	1	0	1	1	0
608323	1	1	1	1	1	1	1	1	1	0	1
608354	1	1	1	1	1	1	1	1	1	1	1
608358	1	1	1	1	1	1	1	1	1	1	1
608380	1	1	1	1	1	1	1	0	1	1	0
608389	1	1	1	1	1	1	1	1	1	1	0
608390	1	1	1	1	1	1	1	1	1	1	0
608393	1	1	1	1	1	1	1	1	1	0	0
608404	1	1	1	1	1	1	1	1	1	0	1
608415	1	1	1	1	1	1	1	1	1	1	1
608454	1	1	1	1	1	1	1	1	1	1	0
608456	1	1	1	1	1	1	1	1	1	0	1
608470	1	1	1	1	1	1	1	1	1	0	0
608540	1	1	1	1	1	1	1	1	1	0	0
608569	1	1	0	1	1	1	1	1	1	1	1
608594	1	1	1	1	1	1	1	1	1	1	1
608611	1	1	1	1	1	1	1	1	1	0	1
608612	1	1	1	1	1	1	1	1	1	0	0
608627	1	1	1	1	1	1	1	1	1	1	0
608629	1	1	1	1	1	1	1	1	1	1	0
608634	1	1	1	1	1	1	1	1	1	1	1
608643	1	1	1	1	1	1	1	1	1	1	1
608644	1	1	1	1	1	1	1	1	1	1	0
608649	1	1	1	1	1	1	1	0	1	1	1
608654	1	1	1	1	1	1	1	1	1	0	1
608673	1	1	1	1	1	1	1	1	1	1	0
608688	1	1	1	1	1	1	1	1	1	0	1
608709	1	1	1	1	1	1	1	1	1	1	0
608728	1	1	1	1	1	1	1	1	1	1	0
608751	1	1	1	1	1	1	1	1	1	0	1
608758	1	1	1	1	1	1	1	1	1	1	1
608776	1	1	1	1	1	1	1	0	1	0	1
608799	1	1	1	1	1	1	1	1	1	1	1
608804	1	1	1	1	1	1	1	1	1	1	0
608808	1	1	1	1	1	1	0	1	1	0	0
608810	1	1	1	1	1	1	1	0	1	1	1
608812	1	1	1	1	1	1	1	0	1	1	1
608837	1	1	1	1	1	1	1	0	1	1	1
608840	1	1	1	1	1	1	1	1	1	1	0
608864	1	1	1	1	1	1	1	1	1	1	0
608874	1	1	1	1	1	1	1	1	1	1	0
608895	1	1	1	1	1	1	1	1	1	1	0
608930	1	1	1	1	1	1	1	1	1	1	1
608931	1	1	1	1	1	1	1	1	1	1	1
608957	1	1	1	1	1	1	1	1	1	1	1
608967	1	1	1	1	1	1	1	1	1	1	1
608978	1	1	1	1	1	1	1	1	1	1	0
608980	1	1	1	1	1	1	1	0	1	1	0
608983	1	1	1	1	1	1	1	0	1	1	0
608984	1	1	1	1	1	1	0	0	1	1	0
608996	1	1	1	1	1	1	1	1	1	1	0
609006	1	1	1	1	1	1	1	0	1	1	0
609015	1	1	1	1	1	1	1	1	1	1	1
609016	1	1	1	1	1	1	1	1	1	1	1

## Sheet: Table S2 (B)
Data sources selected for individual diseases (1: selected, 0: unselected)
Disease	Results of the sequential backward selection strategy												Performance before selection		Performance after selection
MIM Morbid Accession	SIFT	PolyPhen2	LRT	MutationTaster	GERP	PhyloP	GO	PPI	Seq	PFAM	KEGG	Number of selected data sources	MRR	AUC	MRR	AUC
100070	0	0	0	0	0	0	1	0	0	0	1	2	0.643447	0.356541	0.277888	0.722112
100800	0	0	0	0	0	0	1	1	1	0	0	3	0.081772	0.918252	0.028642	0.971358
101000	1	1	1	1	1	1	1	1	1	1	0	10	0.038259	0.961779	0.038259	0.961779
101400	0	0	0	0	0	0	1	1	0	0	0	2	0.07561	0.924425	0.029054	0.970946
101600	1	1	1	1	1	1	1	1	1	1	1	11	0.000397	0.999639	0.000397	0.999639
101800	1	1	0	1	0	0	1	0	0	0	0	4	0.145933	0.854096	0.061541	0.938459
102370	1	1	1	1	1	1	1	1	1	1	0	10	0.039479	0.960559	0.039479	0.960559
102530	1	0	0	0	0	0	0	0	0	0	0	1	0.482334	0.517667	0.256521	0.743479
102700	1	1	1	1	1	1	1	1	1	1	1	11	0.037609	0.96243	0.037609	0.96243
103050	1	1	1	1	1	1	1	1	1	0	1	10	0.028	0.972039	0.028	0.972039
103580	0	0	1	0	0	0	1	1	0	1	0	4	0.055135	0.944902	0.023975	0.976025
104290	1	1	1	1	1	1	1	1	1	1	1	11	0.002102	0.997939	0.002102	0.997939
104300	1	1	1	1	1	1	1	1	1	1	1	11	0.031441	0.968598	0.031441	0.968598
105120	0	1	1	1	0	0	1	1	0	0	0	5	0.177696	0.82233	0.078101	0.921899
105150	1	0	0	0	0	0	0	1	0	1	0	3	0.139893	0.860136	0.027793	0.972207
105200	0	0	1	0	0	0	1	1	0	0	0	3	0.456806	0.543198	0.266841	0.733159
105210	0	0	0	0	0	0	0	1	0	0	0	1	0.403547	0.596461	0.365754	0.634246
105250	0	0	0	0	1	0	0	1	0	1	0	3	0.391878	0.608131	0.271492	0.728508
105400	0	0	0	0	0	0	1	0	0	0	0	1	0.201621	0.798403	0.118877	0.881123
105650	0	0	1	0	0	0	1	0	0	0	0	2	0.447936	0.552069	0.358871	0.641129
106100	0	0	0	0	0	0	1	0	0	0	0	1	0.116865	0.883167	0.038572	0.961428
106210	1	1	1	1	1	1	1	1	1	1	1	11	0.003173	0.996864	0.003173	0.996864
106260	1	1	1	1	1	1	1	1	1	1	0	10	4.1e-05	1	4.1e-05	1
106600	1	1	1	1	1	1	1	1	1	1	0	10	0.00101	0.999031	0.00101	0.999031
106700	0	0	0	0	0	1	1	0	0	0	0	2	0.333649	0.666364	0.069723	0.930277
107250	0	0	1	0	0	0	1	1	1	1	0	5	0.04312	0.956918	0.016185	0.983815
108120	1	1	1	1	1	1	1	1	1	0	1	10	0.106269	0.893763	0.106269	0.893763
108300	1	1	1	1	1	1	1	1	1	1	1	11	0.000391	0.999629	0.000391	0.999629
108500	0	0	0	0	0	0	1	0	0	0	0	1	0.000341	0.9997	0.000206	0.999794
108720	0	0	0	0	0	1	0	1	0	0	1	3	0.000158	0.999863	0.000144	0.999856
108721	1	1	1	1	1	1	1	1	1	1	1	11	8.2e-05	0.999959	8.2e-05	0.999959
108770	0	0	1	0	0	0	1	0	0	0	0	2	0.215554	0.78447	0.214689	0.785311
108900	0	0	0	0	0	0	1	1	0	1	0	3	0.063855	0.936179	0.027208	0.972792
108985	1	0	1	0	1	0	0	0	0	0	0	3	0.179402	0.820625	0.147317	0.852683
109400	0	0	1	0	0	0	1	1	0	0	0	3	0.083482	0.91655	0.044261	0.955739
109800	0	0	0	1	0	0	1	1	1	0	1	5	0.002983	0.997043	0.001442	0.998558
110100	0	0	0	1	0	0	1	0	0	1	0	3	0.125953	0.874077	0.084008	0.915992
112310	1	1	1	1	1	1	1	1	1	1	1	11	0.003706	0.996335	0.003706	0.996335
112500	0	1	1	0	0	0	1	1	0	0	0	4	0.029887	0.970152	0.011592	0.988408
112600	1	1	1	0	1	0	1	1	0	0	1	7	0.004554	0.995479	0.004496	0.995504
113100	1	1	1	1	1	1	1	1	1	1	1	11	0.000144	0.999876	0.000144	0.999876
113200	1	1	1	1	1	1	1	1	1	1	0	10	0.000247	0.999794	0.000247	0.999794
113300	1	1	1	1	1	1	1	1	1	1	0	10	4.1e-05	1	4.1e-05	1
113500	1	1	1	1	1	1	1	1	1	1	0	10	0.000661	0.999381	0.000661	0.999381
113620	1	1	1	1	1	1	1	1	1	1	0	10	0.055221	0.944816	0.055221	0.944816
113650	0	0	1	0	0	0	1	0	0	0	0	2	0.036299	0.963739	0.02935	0.97065
113800	1	1	1	1	1	1	1	1	1	1	1	11	0.001323	0.998719	0.001323	0.998719
113900	1	1	1	1	1	1	1	1	1	1	0	10	0.001884	0.998158	0.001884	0.998158
114000	0	0	0	0	0	0	1	0	0	0	0	1	0.000536	0.999506	0.000391	0.999609
114290	1	0	0	1	0	0	1	1	0	0	0	4	0.064273	0.935763	0.035617	0.964383
114480	0	0	0	0	0	0	1	1	0	0	0	2	0.107154	0.892877	0.030979	0.969021
114500	1	1	1	1	1	1	1	1	1	1	1	11	0.134857	0.865169	0.134857	0.865169
114550	0	0	0	0	0	0	0	1	0	0	0	1	0.494104	0.505896	0.473115	0.526885
115150	1	0	1	0	0	0	1	1	0	0	1	5	0.203066	0.796959	0.186291	0.813709
115195	1	1	1	1	1	1	1	0	1	1	1	10	0.001282	0.998759	0.001282	0.998759
115196	1	1	1	1	1	1	1	1	1	0	1	10	0.006023	0.994018	0.006023	0.994018
115197	0	0	1	0	0	0	1	1	0	0	1	4	0.017506	0.982534	0.003346	0.996654
115200	1	1	1	1	1	1	1	1	1	1	1	11	0.002376	0.997665	0.002376	0.997665
115210	0	0	0	0	0	0	0	0	0	1	0	1	0.009105	0.990936	0.003749	0.996251
115300	0	0	0	0	0	0	0	0	0	0	1	1	0.217746	0.782277	0.133342	0.866658
115310	1	1	1	1	1	1	1	1	1	0	1	10	0.00413	0.995911	0.00413	0.995911
115700	0	0	0	0	0	0	1	0	1	0	0	2	0.000288	0.999753	0.000144	0.999856
116150	1	1	1	1	1	1	1	1	1	1	0	10	0.000398	0.999643	0.000398	0.999643
116200	1	1	1	1	1	1	1	1	1	1	0	10	0.000113	0.999928	0.000113	0.999928
116600	1	1	0	0	1	1	1	1	0	0	0	6	0.202785	0.797239	0.14733	0.85267
116800	1	1	1	1	1	1	1	1	1	1	0	10	0.057771	0.942265	0.057771	0.942265
116860	0	0	1	0	1	0	1	1	0	0	0	4	0.263783	0.736236	0.213062	0.786938
116920	0	0	0	0	0	0	0	1	0	0	1	2	0.101113	0.89892	0.03241	0.96759
117000	0	0	0	0	0	0	0	0	0	1	0	1	0.079382	0.920649	0.02864	0.97136
117550	1	1	0	0	0	1	1	0	1	0	0	5	0.002197	0.997845	0.000309	0.999691
118100	0	0	0	0	0	0	0	0	0	0	1	1	0.575703	0.42429	0.235306	0.764694
118200	1	1	1	1	1	1	1	1	1	1	1	11	0.000712	0.999329	0.000712	0.999329
118210	1	1	1	1	1	1	1	1	1	1	0	10	0.01021	0.989831	0.01021	0.989831
118220	1	1	1	1	1	1	1	1	1	1	0	10	0.001893	0.998149	0.001893	0.998149
118300	1	0	1	0	0	0	0	1	0	0	0	3	0.002091	0.99795	0.00196	0.99804
118400	0	0	0	0	1	1	0	1	0	0	0	3	0.352007	0.648005	0.133331	0.866669
118450	1	1	1	1	1	1	1	1	1	1	1	11	0.000908	0.999131	0.000908	0.999131
118600	0	0	1	1	0	0	0	0	0	0	0	2	0.428903	0.571103	0.200244	0.799756
118700	1	0	1	1	0	0	1	0	0	0	0	4	0.185495	0.814531	0.061646	0.938354
118800	0	0	0	0	0	1	0	0	0	0	0	1	0.645798	0.35419	0.332707	0.667293
119300	1	1	1	1	1	1	1	1	1	1	0	10	4.1e-05	1	4.1e-05	1
119500	1	1	1	1	1	1	1	1	1	1	0	10	0.118069	0.881962	0.118069	0.881962
119600	1	1	1	1	1	1	1	1	1	0	0	9	0.106845	0.893188	0.106845	0.893188
119800	1	1	1	1	1	1	1	1	1	1	0	10	0.161296	0.838732	0.161296	0.838732
119900	0	0	0	0	0	0	0	1	0	0	0	1	0.009925	0.990115	0.008813	0.991187
120100	1	1	1	1	1	1	1	1	1	1	1	11	0.000248	0.999794	0.000248	0.999794
120200	1	1	1	1	1	1	1	1	1	1	1	11	0.000826	0.999215	0.000826	0.999215
120330	1	1	1	1	1	1	1	1	1	1	0	10	0.002716	0.997326	0.002716	0.997326
120435	0	0	0	0	0	0	1	1	0	0	0	2	0.052488	0.947549	0.032647	0.967353
120970	0	0	0	0	0	0	1	1	0	0	0	2	0.22417	0.775853	0.057668	0.942332
121050	1	1	1	1	1	1	1	1	1	1	0	10	0.00818	0.991861	0.00818	0.991861
121200	0	0	0	0	0	0	1	1	0	1	0	3	0.004324	0.995717	0.000949	0.999051
121201	1	1	1	1	1	1	1	1	1	1	0	10	0.000124	0.999917	0.000124	0.999917
121300	0	0	0	0	0	1	0	1	0	0	1	3	0.006889	0.993152	0.002192	0.997808
121800	0	0	1	0	0	0	1	0	0	0	0	2	0.309139	0.690877	0.256704	0.743296
121850	0	0	1	1	1	0	0	0	0	0	0	3	0.04705	0.952988	0.01167	0.98833
121900	1	1	1	1	1	1	1	1	1	0	0	9	4.1e-05	1	4.1e-05	1
122000	0	0	0	0	0	0	0	1	0	1	0	2	0.032327	0.967701	0.009166	0.990834
122100	1	1	0	0	1	0	1	0	0	0	0	4	0.278467	0.721551	0.183762	0.816238
122200	0	0	0	0	0	0	1	0	0	0	0	1	0.000133	0.999908	6.2e-05	0.999938
122470	1	1	1	1	1	1	1	1	1	0	0	9	0.077989	0.922046	0.077989	0.922046
122700	0	1	0	0	1	0	0	0	0	0	0	2	0.23774	0.762281	0.117041	0.882959
122860	0	0	0	0	0	0	0	1	1	0	0	2	0.026909	0.97313	0.010199	0.989801
122880	1	1	1	1	1	1	1	1	1	1	0	10	0.012019	0.988021	0.012019	0.988021
123000	0	0	1	1	1	0	0	0	0	0	0	3	0.304052	0.695964	0.191095	0.808905
123100	0	0	0	0	0	0	0	1	0	0	0	1	0.092397	0.907637	0.025461	0.974539
123320	1	1	1	1	1	1	1	1	1	0	1	10	0.000757	0.999284	0.000757	0.999284
123400	1	0	0	0	0	1	0	0	1	0	1	4	0.0371	0.962935	0.013937	0.986063
123500	1	1	1	1	1	1	1	1	1	1	1	11	0.001333	0.998693	0.001333	0.998693
123790	1	1	1	1	1	1	1	1	1	1	1	11	0.001092	0.998949	0.001092	0.998949
124200	1	0	1	0	1	0	0	0	1	0	1	5	0.0283	0.971739	0.018839	0.981161
124500	1	1	1	1	1	1	1	1	1	1	0	10	0.000185	0.999835	0.000185	0.999835
125250	1	1	1	1	1	1	1	1	1	1	0	10	0.063155	0.936861	0.063155	0.936861
125310	1	0	0	0	0	0	1	1	0	0	0	3	0.339784	0.66023	0.242991	0.757009
125420	1	1	1	1	1	1	1	1	1	0	0	9	0.00247	0.997571	0.00247	0.997571
125500	0	0	0	0	0	0	0	1	0	0	0	1	0.005722	0.994319	0.000823	0.999177
125700	0	0	0	0	0	0	0	1	0	0	1	2	0.039552	0.960486	0.009698	0.990302
125800	0	0	0	0	0	0	0	1	0	0	1	2	0.115944	0.884087	0.071334	0.928666
125850	0	0	0	1	0	1	1	1	0	0	1	5	0.020504	0.979536	0.004603	0.995397
125851	0	0	1	0	1	0	1	1	0	0	1	5	0.020895	0.979144	0.00291	0.99709
125853	0	0	0	0	0	0	0	1	0	0	1	2	0.285101	0.714917	0.134313	0.865687
126600	1	1	1	1	1	1	1	1	1	1	0	10	0.025675	0.974364	0.025675	0.974364
127300	1	1	1	1	1	1	1	1	1	1	0	10	0.004944	0.995097	0.004944	0.995097
127400	1	0	0	1	0	0	0	0	0	0	0	2	0.31611	0.683905	0.190039	0.809961
127750	1	1	1	1	1	1	1	1	1	0	1	10	0.001446	0.998596	0.001446	0.998596
128200	0	0	0	0	0	0	0	0	0	1	0	1	0.022638	0.977401	0.009776	0.990224
128230	0	0	1	0	0	0	0	1	0	0	1	3	0.146783	0.853245	0.079752	0.920248
128235	1	0	1	0	0	0	1	0	0	0	0	3	0.217973	0.78205	0.094814	0.905186
129400	1	1	1	1	1	1	1	1	1	1	0	10	0.000219	0.999818	0.000219	0.999818
129490	1	1	1	1	1	1	1	1	1	1	1	11	0.000578	0.999464	0.000578	0.999464
129500	1	1	1	1	1	1	1	0	1	1	0	9	0.009062	0.990978	0.009062	0.990978
129600	1	1	1	1	1	1	1	1	1	1	0	10	0.006677	0.993364	0.006677	0.993364
130000	0	0	0	0	0	0	1	0	0	0	0	1	0.002067	0.997974	0.001033	0.998967
130010	0	0	0	0	0	0	0	1	0	0	1	2	0.001492	0.998549	0.000989	0.999011
130050	1	1	1	1	1	1	1	1	1	1	1	11	0.001729	0.998312	0.001729	0.998312
130070	1	0	0	0	0	0	0	1	0	0	1	3	0.223513	0.77651	0.052068	0.947932
130600	0	0	0	0	0	0	0	0	1	0	0	1	0.001628	0.998413	0.000495	0.999505
131100	1	0	0	0	0	0	1	1	0	0	0	3	0.012315	0.987726	0.004479	0.995521
131300	0	0	0	0	0	0	1	1	0	0	1	3	0.154553	0.845476	0.031627	0.968373
131750	0	0	0	0	0	0	0	1	0	0	0	1	0.000454	0.999573	0.000248	0.999752
131760	1	1	1	1	1	1	1	1	1	1	0	10	7.8e-05	0.999964	7.8e-05	0.999964
131800	1	1	1	1	1	1	1	1	1	1	0	10	0.000378	0.99966	0.000378	0.99966
131850	1	1	1	1	1	1	1	1	1	1	0	10	0.000227	0.999794	0.000227	0.999794
131900	1	1	1	1	1	1	1	1	1	1	0	10	5.5e-05	0.999986	5.5e-05	0.999986
131950	0	0	0	0	0	1	1	1	0	0	0	3	0.010519	0.989521	0.006972	0.993028
132400	1	1	1	1	1	1	1	1	1	1	1	11	0.001101	0.99894	0.001101	0.99894
132600	1	1	1	1	1	1	1	1	1	1	1	11	0.042676	0.957356	0.042676	0.957356
132800	1	1	1	1	1	1	1	1	1	1	1	11	0.001627	0.998414	0.001627	0.998414
132900	1	0	0	0	0	0	0	1	0	0	0	2	0.363929	0.636082	0.239166	0.760834
133020	1	0	0	0	0	0	0	0	0	0	0	1	0.40659	0.593417	0.188464	0.811536
133100	0	0	0	0	0	0	0	1	0	1	0	2	0.15139	0.848639	0.016335	0.983665
133200	0	0	1	0	0	0	1	0	0	0	0	2	0.370334	0.629677	0.247293	0.752707
133239	1	1	1	1	1	1	1	1	1	1	1	11	0.002843	0.997197	0.002843	0.997197
133700	0	0	0	0	0	0	0	0	1	0	0	1	0.000565	0.999477	0.000165	0.999835
133701	1	1	1	1	1	1	1	1	1	1	1	11	0.000665	0.999376	0.000665	0.999376
133780	0	0	0	0	0	0	1	0	0	0	0	1	0.190333	0.809692	0.184466	0.815534
134610	0	0	0	0	0	0	0	0	0	0	1	1	0.003756	0.996285	0.000784	0.999216
135100	1	1	1	1	1	1	1	1	1	1	1	11	0.010313	0.989727	0.010313	0.989727
135150	0	0	0	0	1	0	0	1	1	0	0	3	0.011481	0.98856	0.002412	0.997588
135700	0	0	0	0	0	0	0	1	0	1	0	2	0.055853	0.944183	0.052165	0.947835
136120	0	0	0	0	0	0	1	0	0	0	0	1	0.002842	0.997199	0.001986	0.998014
136520	1	1	1	1	1	1	1	1	1	1	1	11	0.002699	0.997342	0.002699	0.997342
136680	1	1	1	1	1	1	1	1	1	1	0	10	0.000165	0.999876	0.000165	0.999876
136760	1	0	0	0	0	0	0	0	1	1	0	3	0.080371	0.919664	0.022787	0.977213
136800	0	0	0	0	0	0	1	1	0	0	0	2	0.185277	0.814749	0.025829	0.974171
136880	0	0	0	0	0	0	1	1	0	0	0	2	0.150923	0.849106	0.03519	0.96481
136900	0	0	0	0	0	0	1	0	0	0	0	1	0.412198	0.587809	0.305039	0.694961
137215	1	1	1	1	1	1	1	1	1	1	1	11	0.083107	0.916928	0.083107	0.916928
137440	1	0	0	0	0	0	1	0	0	0	1	3	0.247361	0.752659	0.152581	0.847419
137600	1	1	1	1	1	1	1	1	1	1	1	11	0.000928	0.999113	0.000928	0.999113
137750	1	1	1	1	1	1	1	1	1	1	0	10	0.17917	0.820856	0.17917	0.820856
137760	1	1	1	1	1	1	1	1	1	0	0	9	0.157144	0.842885	0.157144	0.842885
137920	0	0	0	0	0	0	0	0	0	0	1	1	0.014371	0.985669	0.007333	0.992667
138500	1	1	1	0	0	0	0	0	0	0	0	3	0.312989	0.687006	0.182768	0.817232
138800	0	0	0	0	0	1	1	0	0	0	0	2	0.089056	0.910978	0.047401	0.952599
139090	1	0	0	0	0	1	0	0	0	0	0	2	0.346637	0.653376	0.237219	0.762781
139210	0	0	1	0	0	0	1	0	0	0	1	3	0.17768	0.822347	0.062712	0.937288
140000	1	1	1	1	1	1	1	1	1	1	0	10	0.001688	0.998353	0.001688	0.998353
141200	1	1	1	1	1	1	1	1	1	1	1	11	0.000131	0.999904	0.000131	0.999904
141500	0	0	0	0	0	0	1	1	0	0	0	2	0.000379	0.999663	0.000351	0.999649
142623	1	1	1	1	1	1	1	1	1	1	1	11	0.000589	0.99945	0.000589	0.99945
142680	0	0	0	0	0	0	1	1	0	0	0	2	0.200962	0.799063	0.092024	0.907976
142690	1	1	1	0	0	1	0	0	0	0	0	4	0.152416	0.847613	0.133204	0.866796
142900	0	0	0	0	0	0	1	1	0	0	0	2	0.070559	0.929477	0.051247	0.948753
142945	0	0	0	0	0	0	1	0	1	0	1	3	0.008694	0.991346	0.003181	0.996819
142946	0	0	0	0	0	0	1	0	0	0	0	1	0.26654	0.733479	0.166474	0.833526
143095	1	1	1	1	1	1	1	1	1	1	1	11	0.292061	0.707956	0.292061	0.707956
143470	0	0	0	0	0	0	1	1	0	0	0	2	0.269107	0.730912	0.00819	0.99181
143500	1	1	1	1	1	1	1	1	1	1	1	11	0.000577	0.999464	0.000577	0.999464
143860	1	1	1	1	0	0	0	0	0	0	0	4	0.15738	0.842648	0.061368	0.938632
143880	1	1	0	0	0	0	0	1	0	0	0	3	0.157022	0.843006	0.132012	0.867988
143890	0	0	0	0	0	0	1	1	0	0	0	2	0.10522	0.894813	0.021215	0.978785
144010	1	0	0	0	0	1	0	1	0	0	0	3	0.012254	0.987786	0.005465	0.994535
144200	1	0	1	0	0	0	0	0	0	1	0	3	0.010583	0.989457	0.003923	0.996077
144700	1	1	1	1	1	1	1	1	1	0	1	10	0.137432	0.862598	0.137432	0.862598
144750	1	1	1	1	1	1	1	1	1	1	1	11	0.002433	0.997608	0.002433	0.997608
145000	1	0	0	0	0	0	0	1	0	0	0	2	0.008606	0.991435	0.004102	0.995898
145001	1	1	1	1	1	1	1	1	1	0	0	9	0.005863	0.994178	0.005863	0.994178
145250	0	0	0	0	0	0	0	0	0	0	1	1	0.371001	0.62901	0.20766	0.79234
145600	0	0	1	0	0	0	1	1	0	0	0	3	0.002278	0.997763	0.001618	0.998382
145650	1	1	1	1	1	1	1	1	1	1	1	11	0.000866	0.999175	0.000866	0.999175
145900	1	1	1	1	1	1	1	1	1	1	1	11	0.010926	0.989106	0.010926	0.989106
145980	1	0	0	0	0	0	0	0	1	0	0	2	0.000724	0.999316	0.000456	0.999544
146000	1	0	1	0	0	0	0	0	0	0	1	3	0.00178	0.998253	0.001751	0.998249
146110	1	1	1	1	1	1	1	1	1	1	1	11	0.101548	0.898483	0.101548	0.898483
146200	1	1	1	1	1	1	1	1	1	1	0	10	0.226485	0.773538	0.226485	0.773538
146255	1	1	1	1	1	1	1	1	1	1	0	10	0.058559	0.941478	0.058559	0.941478
146300	1	1	1	1	1	1	1	1	1	0	1	10	0.311504	0.688512	0.311504	0.688512
146510	0	0	0	0	0	0	0	0	1	1	0	2	0.102261	0.897772	0.004558	0.995442
146800	1	1	1	1	1	1	1	1	1	1	0	10	0.001581	0.99846	0.001581	0.99846
147060	0	0	1	0	0	0	0	1	0	0	0	2	0.194004	0.806021	0.166067	0.833933
147250	0	0	0	0	0	0	1	0	1	0	1	3	0.004629	0.995412	0.000579	0.999421
147480	1	1	1	1	1	1	1	1	1	1	1	11	0.000342	0.999688	0.000342	0.999688
147891	0	0	0	0	0	0	1	0	0	0	0	1	0.307344	0.692672	0.26804	0.73196
147920	1	0	0	0	0	0	0	0	1	0	0	2	0.170169	0.829858	0.166522	0.833478
147950	1	1	1	1	1	1	1	1	1	1	1	11	0.021297	0.978742	0.021297	0.978742
148210	1	1	1	1	1	1	1	1	1	1	0	10	0.000439	0.999602	0.000439	0.999602
148300	0	0	0	0	0	0	1	0	0	1	0	2	0.283689	0.716325	0.043667	0.956333
148350	1	1	1	1	1	1	1	1	1	1	0	10	0.000103	0.999917	0.000103	0.999917
148500	0	1	1	0	0	0	0	0	0	0	0	2	0.351705	0.648307	0.196268	0.803732
148820	1	1	1	1	1	1	1	1	1	1	0	10	0.001442	0.998599	0.001442	0.998599
149000	0	0	0	0	0	0	1	0	0	0	0	1	0.849179	0.150793	0.469408	0.530592
149200	1	1	1	1	1	1	1	1	1	1	0	10	4.1e-05	1	4.1e-05	1
149400	0	0	1	0	0	0	1	0	0	0	1	3	0.295308	0.704709	0.066191	0.933809
149730	0	0	0	0	0	0	1	1	0	0	1	3	0.021378	0.978661	0.005979	0.994021
150250	1	1	1	1	1	1	1	1	1	1	1	11	0.00035	0.999671	0.00035	0.999671
150800	0	0	0	0	0	0	0	1	0	0	0	1	0.002724	0.997317	0.002435	0.997565
151210	1	1	1	1	1	1	1	1	1	1	1	11	0.001937	0.998104	0.001937	0.998104
151600	1	1	1	1	1	1	1	0	1	1	1	10	0.186355	0.81367	0.186355	0.81367
151623	1	1	1	1	1	1	1	1	1	1	1	11	0.039648	0.96039	0.039648	0.96039
151660	0	0	0	0	0	0	1	1	0	0	0	2	0.002383	0.997653	0.001923	0.998077
152700	1	1	1	1	1	1	1	0	1	0	1	9	0.505032	0.494965	0.505032	0.494965
152950	1	1	1	1	1	1	1	1	1	1	0	10	0.031768	0.96827	0.031768	0.96827
153100	1	1	1	1	1	1	1	1	1	1	1	11	0.004088	0.995953	0.004088	0.995953
153400	1	1	1	1	1	1	1	1	1	1	0	10	0.062394	0.937642	0.062394	0.937642
153480	1	1	1	1	1	1	1	1	1	1	1	11	0.001061	0.99898	0.001061	0.99898
153640	1	1	1	1	1	1	1	1	1	1	1	11	6.2e-05	0.999959	6.2e-05	0.999959
153650	1	1	1	1	1	1	1	1	1	1	1	11	0.000546	0.999495	0.000546	0.999495
153700	1	1	1	1	1	1	1	1	1	0	0	9	0.253193	0.746827	0.253193	0.746827
153800	1	1	1	1	1	1	1	1	1	1	1	11	0.001394	0.998644	0.001394	0.998644
154020	1	1	1	0	0	0	0	0	0	0	1	4	0.241206	0.758816	0.156171	0.843829
154500	1	1	0	0	0	0	0	0	1	0	0	3	0.269518	0.730501	0.149132	0.850868
154700	0	0	0	0	0	0	0	1	1	0	0	2	0.010492	0.989549	0.008453	0.991547
155100	1	1	1	1	1	1	1	1	1	1	1	11	6.2e-05	0.999959	6.2e-05	0.999959
155240	0	0	0	1	0	0	1	1	1	1	1	6	0.003244	0.996777	0.001694	0.998306
155255	1	1	1	1	1	1	1	1	1	1	1	11	0.008928	0.991107	0.008928	0.991107
155601	1	1	1	1	1	1	1	1	1	1	1	11	0.006221	0.99382	0.006221	0.99382
156400	1	0	0	0	0	0	1	1	0	0	0	3	0.143386	0.856643	0.064835	0.935165
156500	0	1	0	0	0	0	1	1	1	0	0	4	0.00625	0.993791	0.003218	0.996782
156530	1	1	1	1	1	1	1	1	1	1	0	10	0.000609	0.999431	0.000609	0.999431
157170	0	0	0	0	0	0	0	1	0	1	0	2	0.05189	0.948147	0.004977	0.995023
157640	0	0	0	1	0	0	0	1	1	0	0	3	0.001049	0.998989	0.000475	0.999525
158000	1	0	0	0	0	0	0	0	1	0	0	2	0.008656	0.991385	0.004142	0.995858
158300	0	1	0	0	0	0	0	0	1	0	1	3	0.00383	0.996211	0.003439	0.996561
158350	1	1	1	1	1	1	1	1	1	1	1	11	0.00215	0.997891	0.00215	0.997891
158590	1	1	1	1	1	1	1	1	1	1	0	10	0.013676	0.986354	0.013676	0.986354
158600	0	0	0	1	0	0	1	1	0	0	1	4	0.216844	0.783179	0.118651	0.881349
158810	1	1	1	1	1	1	1	1	1	1	1	11	0.006081	0.99396	0.006081	0.99396
159000	0	0	0	0	0	1	0	1	0	1	0	3	0.013789	0.986251	0.011993	0.988007
159001	1	1	1	1	1	1	1	1	1	1	1	11	0.004668	0.995373	0.004668	0.995373
159900	1	1	1	1	1	1	1	1	1	1	1	11	0.151274	0.848754	0.151274	0.848754
160120	0	0	1	1	0	0	0	0	1	1	0	4	0.046864	0.953174	0.0223	0.9777
160150	1	1	1	1	1	1	1	1	1	1	1	11	0.104086	0.895947	0.104086	0.895947
160500	1	1	1	1	1	1	1	1	1	1	1	11	0.000799	0.999242	0.000799	0.999242
160800	1	1	1	1	1	1	1	1	1	1	0	10	0.001915	0.998127	0.001915	0.998127
160980	0	0	0	1	0	0	0	1	0	0	1	3	0.128018	0.872012	0.099946	0.900054
161200	0	0	1	1	0	0	0	1	0	0	0	3	0.048511	0.951526	0.040132	0.959868
161400	0	0	0	0	0	0	1	0	0	0	0	1	0.498431	0.501569	0.339265	0.660735
161800	0	0	1	0	0	0	0	1	0	1	0	3	0.027186	0.972854	0.02183	0.97817
162000	0	0	0	0	0	0	1	1	0	0	0	2	0.002309	0.997732	0.000948	0.999052
162100	1	1	0	0	0	0	0	0	0	0	0	2	0.518099	0.481899	0.1839	0.8161
162200	0	0	0	0	0	0	1	1	0	0	0	2	0.081064	0.91897	0.026704	0.973296
162300	1	1	1	1	1	1	1	1	1	1	1	11	0.000103	0.999917	0.000103	0.999917
162350	1	0	0	0	1	0	1	0	0	0	0	3	0.300368	0.699649	0.10834	0.89166
162400	1	0	0	1	0	0	0	0	0	0	1	3	0.307493	0.692523	0.126686	0.873314
162500	1	1	1	1	1	1	1	1	1	1	0	10	0.001793	0.998248	0.001793	0.998248
162800	1	1	1	1	1	1	1	1	1	1	1	11	0.000289	0.999752	0.000289	0.999752
162830	0	0	0	0	0	0	1	0	0	1	1	3	0.809159	0.190815	0.412898	0.587102
162900	0	0	0	0	0	0	1	0	0	0	1	2	0.130161	0.869849	0.024342	0.975658
163500	0	0	1	0	0	0	1	1	0	0	1	4	0.046052	0.953985	0.008534	0.991466
163800	1	1	1	1	1	1	1	1	1	1	0	10	0.010518	0.989523	0.010518	0.989523
164200	0	0	0	0	0	0	1	1	0	0	0	2	0.147982	0.852047	0.076377	0.923623
164280	1	1	1	1	1	1	1	1	1	1	0	10	0.014204	0.985836	0.014204	0.985836
165300	1	1	1	1	1	1	1	1	1	0	0	9	0.112378	0.887654	0.112378	0.887654
165500	1	1	1	1	1	1	1	1	1	1	0	10	0.014349	0.985691	0.014349	0.985691
165550	0	0	1	0	0	0	1	0	0	1	0	3	0.003191	0.99685	0.001238	0.998762
166000	0	0	1	0	0	0	0	1	0	0	0	2	0.39799	0.602019	0.121288	0.878712
166200	1	1	1	1	1	1	1	1	1	1	1	11	0.000281	0.99974	0.000281	0.99974
166210	1	1	1	1	1	1	1	1	1	1	1	11	0.000598	0.999423	0.000598	0.999423
166220	1	1	1	1	1	1	1	1	1	1	1	11	0.000289	0.999752	0.000289	0.999752
166250	1	1	1	1	1	1	1	1	1	1	1	11	0.011388	0.988653	0.011388	0.988653
166260	0	0	1	0	1	0	0	0	0	1	0	3	0.257535	0.742485	0.196553	0.803447
166300	0	0	0	0	0	0	0	1	0	0	0	1	0.380425	0.619585	0.308487	0.691513
166350	1	1	1	1	1	1	1	1	1	1	1	11	0.004462	0.995579	0.004462	0.995579
166600	0	0	0	1	0	0	0	0	0	0	0	1	0.247982	0.752039	0.202627	0.797373
167200	1	1	0	0	0	0	0	0	0	1	0	3	0.01305	0.98699	0.012053	0.987947
167210	1	1	1	1	1	1	1	1	1	1	0	10	0.003268	0.996773	0.003268	0.996773
167320	0	0	1	1	1	1	1	1	0	0	0	6	0.035608	0.96443	0.010542	0.989458
167800	0	0	0	0	0	0	0	1	0	0	1	2	0.427913	0.572093	0.233481	0.766519
168000	1	1	1	1	1	1	1	1	1	0	1	10	0.080708	0.91932	0.080708	0.91932
168300	1	1	1	1	1	1	1	1	1	1	0	10	5.1e-05	0.99999	5.1e-05	0.99999
168400	1	1	1	1	1	1	1	1	1	1	0	10	6.2e-05	0.999959	6.2e-05	0.999959
168500	1	1	1	1	1	1	1	1	1	1	0	10	0.005341	0.9947	0.005341	0.9947
168600	1	1	1	1	1	1	1	1	1	1	1	11	0.002691	0.99735	0.002691	0.99735
168601	0	0	0	0	0	0	1	0	0	0	1	2	0.003897	0.996144	0.003264	0.996736
168605	1	0	0	1	0	0	0	1	0	0	0	3	0.239805	0.760216	0.163891	0.836109
169100	0	0	1	0	0	1	1	0	0	0	0	3	0.264109	0.73591	0.210201	0.789799
169150	1	0	1	0	0	0	1	1	0	0	0	4	0.112325	0.887707	0.019122	0.980878
169400	0	0	1	0	0	1	0	1	0	0	0	3	0.116005	0.884026	0.053606	0.946394
169600	1	1	1	1	1	1	1	0	1	1	0	9	0.015034	0.985006	0.015034	0.985006
170390	0	1	1	0	0	0	0	1	0	0	0	3	0.129464	0.870566	0.079622	0.920378
170400	1	0	0	1	0	0	1	0	1	0	1	5	0.008378	0.991662	0.007718	0.992282
170500	1	1	1	1	1	1	1	1	1	1	0	10	0.000354	0.999684	0.000354	0.999684
170650	1	1	1	1	1	1	1	1	1	1	1	11	0.001526	0.998516	0.001526	0.998516
171300	1	1	1	1	1	1	1	1	1	1	1	11	0.032094	0.967941	0.032094	0.967941
171400	1	1	1	1	1	1	1	1	1	1	1	11	0.000208	0.999834	0.000208	0.999834
172700	0	0	0	0	0	0	1	0	1	0	0	2	0.00882	0.99122	0.000868	0.999132
172800	1	1	1	1	1	1	1	1	1	1	1	11	0.013646	0.986394	0.013646	0.986394
172870	0	0	0	0	0	0	1	1	0	0	0	2	0.643978	0.35601	0.239195	0.760805
173100	0	0	0	0	0	0	0	1	0	0	0	1	0.309054	0.690962	0.162925	0.837075
173600	0	0	1	0	0	1	0	0	0	0	0	2	0.481205	0.518797	0.196451	0.803549
173650	0	0	0	1	1	0	0	0	0	0	0	2	0.404213	0.595795	0.281455	0.718545
173900	0	0	0	0	0	0	1	1	0	0	0	2	0.174048	0.825979	0.077918	0.922082
174200	0	0	0	0	1	1	1	0	0	0	1	4	0.046549	0.953488	0.013952	0.986048
174800	1	1	1	1	1	1	1	1	1	1	1	11	0.000434	0.999607	0.000434	0.999607
174900	1	1	1	1	1	1	1	1	1	1	1	11	0.018781	0.981259	0.018781	0.981259
175100	0	0	0	0	0	0	0	1	0	1	1	3	0.002798	0.997238	0.001364	0.998636
175200	1	1	1	1	1	1	1	1	1	1	1	11	0.024107	0.975929	0.024107	0.975929
175700	0	0	0	0	0	0	1	0	0	0	1	2	0.138064	0.861966	0.012379	0.987621
175780	0	1	1	1	0	1	0	0	0	0	0	4	0.151422	0.848607	0.098915	0.901085
175900	0	0	0	0	0	0	0	1	0	0	0	1	0.721746	0.278235	0.384226	0.615774
176100	0	0	0	0	0	0	0	1	0	0	0	1	0.004322	0.995719	0.003227	0.996773
176200	1	1	1	0	0	0	1	1	0	0	1	6	0.007018	0.993024	0.005681	0.994319
176305	1	1	1	1	1	1	1	1	1	1	0	10	0.00035	0.999671	0.00035	0.999671
176400	0	0	1	0	0	0	0	0	0	0	1	2	0.005948	0.994093	0.005844	0.994156
176410	1	1	1	1	1	1	1	1	1	1	1	11	0.003536	0.996505	0.003536	0.996505
176430	1	1	1	1	1	1	1	1	1	1	1	11	0.000744	0.999297	0.000744	0.999297
176450	1	1	0	0	0	0	1	1	0	0	0	4	0.186192	0.813834	0.085931	0.914069
176670	1	1	1	1	1	1	1	1	1	1	1	11	0.002455	0.997586	0.002455	0.997586
176807	1	1	1	1	1	1	1	1	1	1	1	11	0.043842	0.956195	0.043842	0.956195
176860	1	1	1	1	1	1	1	1	1	1	1	11	0.022906	0.977134	0.022906	0.977134
176920	1	1	1	1	1	1	1	1	1	1	1	11	0.002003	0.998017	0.002003	0.998017
177000	0	0	1	1	0	0	0	1	0	0	1	4	0.015964	0.984076	0.001694	0.998306
177170	0	1	0	0	0	0	1	1	0	0	1	4	0.004137	0.995904	0.001712	0.998288
177200	1	1	1	1	1	1	1	1	1	0	1	10	0.000234	0.999807	0.000234	0.999807
178600	0	0	1	0	0	0	1	1	0	0	0	3	0.045952	0.954086	0.028108	0.971892
179800	1	1	1	1	1	1	1	1	1	1	1	11	0.046986	0.953051	0.046986	0.953051
180100	0	0	0	0	0	0	1	0	0	0	0	1	0.320241	0.679774	0.012442	0.987558
180104	1	1	1	1	1	1	1	1	1	0	0	9	0.338253	0.66176	0.338253	0.66176
180105	0	0	0	0	0	0	0	1	0	0	1	2	0.341978	0.658035	0.165711	0.834289
180200	0	0	0	0	0	0	1	0	0	0	1	2	0.069643	0.930393	0.059465	0.940535
180500	0	0	0	0	0	0	0	1	0	0	0	1	0.128744	0.871287	0.012461	0.987539
180700	1	0	0	0	0	0	0	1	0	0	0	2	0.114167	0.885864	0.09037	0.90963
180800	0	0	0	0	0	0	0	0	1	0	0	1	0.000927	0.999093	0.000865	0.999135
180849	1	1	1	1	1	1	1	1	1	1	1	11	0.031847	0.968192	0.031847	0.968192
181350	1	1	1	1	1	1	1	1	1	1	1	11	0.001821	0.99822	0.001821	0.99822
181400	0	0	0	0	0	1	0	1	1	0	1	4	0.022375	0.977644	0.021695	0.978305
181405	0	0	0	1	0	0	0	0	0	0	0	1	0.487682	0.512319	0.201738	0.798262
181430	1	1	1	1	1	1	1	1	1	1	1	11	4.1e-05	1	4.1e-05	1
181450	1	0	1	1	1	0	1	0	0	0	0	5	0.053992	0.946045	0.022596	0.977404
182000	1	1	1	1	1	1	1	1	1	1	1	11	0.063511	0.936516	0.063511	0.936516
182230	0	0	0	0	0	0	0	1	0	1	0	2	0.018499	0.981541	0.004711	0.995289
182600	1	1	1	1	1	1	1	1	1	1	0	10	0.048214	0.951823	0.048214	0.951823
182601	1	1	1	1	1	1	1	1	1	1	0	10	0.003013	0.997028	0.003013	0.997028
182900	1	0	0	0	0	0	1	1	0	0	0	3	0.238907	0.761114	0.07947	0.92053
182920	1	1	1	1	1	1	1	1	1	1	0	10	0.011498	0.988543	0.011498	0.988543
182940	0	0	0	0	0	0	1	0	1	0	0	2	0.17186	0.828167	0.141523	0.858477
182980	1	1	1	1	1	1	1	1	1	1	0	10	8.2e-05	0.999959	8.2e-05	0.999959
183086	1	1	1	1	1	1	1	1	1	1	1	11	0.002165	0.997876	0.002165	0.997876
183900	0	0	0	0	1	1	1	1	0	0	0	4	0.00046	0.999561	0.000329	0.999671
184250	1	1	1	1	1	1	1	1	1	1	1	11	0.00264	0.997401	0.00264	0.997401
184252	1	1	1	1	1	1	1	1	1	1	0	10	0.003879	0.996157	0.003879	0.996157
184500	1	1	1	1	1	1	1	1	1	1	0	10	0.003453	0.996588	0.003453	0.996588
184900	1	1	1	1	1	1	1	1	1	1	0	10	0.011248	0.988792	0.011248	0.988792
185800	1	1	1	1	1	1	1	1	1	1	1	11	0.000662	0.999379	0.000662	0.999379
186000	1	1	1	1	1	1	1	1	1	1	0	10	0.000556	0.999465	0.000556	0.999465
186100	0	0	0	0	0	1	0	1	1	1	1	5	0.006051	0.99399	0.002326	0.997674
186300	1	1	1	1	1	1	1	1	1	1	0	10	0.000206	0.999835	0.000206	0.999835
186500	1	1	1	1	1	1	1	1	1	0	1	10	0.00066	0.999381	0.00066	0.999381
186570	1	1	1	1	1	1	1	1	1	0	1	10	0.000357	0.999684	0.000357	0.999684
186580	1	1	1	1	1	1	1	1	1	1	1	11	0.003863	0.996178	0.003863	0.996178
187300	0	0	0	0	0	0	1	0	0	0	0	1	0.386487	0.613522	0.14361	0.85639
187500	0	0	0	0	0	0	1	1	0	1	0	3	0.034403	0.965626	0.021015	0.978985
187600	1	1	1	1	1	1	1	1	1	1	1	11	0.001129	0.998895	0.001129	0.998895
187601	1	1	1	1	1	1	1	1	1	1	1	11	0.001731	0.99831	0.001731	0.99831
188000	0	0	0	1	0	0	0	0	0	0	0	1	0.679148	0.320837	0.412377	0.587623
188055	0	0	0	0	0	0	0	1	1	0	0	2	0.00588	0.994161	0.00558	0.99442
188400	1	1	0	1	1	1	1	1	1	1	0	9	0.000784	0.999257	0.000784	0.999257
188570	1	1	1	1	1	1	1	1	1	1	1	11	0.002305	0.997737	0.002305	0.997737
190350	1	1	1	1	1	1	1	1	1	1	0	10	0.000906	0.999135	0.000906	0.999135
190351	1	1	1	1	1	1	1	1	1	1	0	10	0.001919	0.998122	0.001919	0.998122
190440	0	0	0	0	1	0	0	0	1	0	0	2	0.003416	0.996625	0.002984	0.997016
190900	1	1	1	1	1	1	1	1	1	1	0	10	0.014809	0.985231	0.014809	0.985231
191100	0	0	0	0	0	0	1	1	0	0	0	2	0.272643	0.727376	0.081996	0.918004
191830	0	0	0	0	0	0	1	0	0	0	0	1	0.273124	0.726894	0.208598	0.791402
191900	0	0	1	0	0	1	1	1	1	1	1	7	0.002432	0.997604	0.001015	0.998985
192430	1	1	1	1	1	1	1	1	1	1	0	10	8.2e-05	0.999959	8.2e-05	0.999959
192500	1	1	1	1	1	1	1	1	1	1	1	11	0.00027	0.999771	0.00027	0.999771
192600	0	0	0	0	0	0	1	0	0	0	0	1	0.02337	0.97667	0.009802	0.990198
192950	1	1	1	1	1	1	1	1	1	1	0	10	0.033811	0.966227	0.033811	0.966227
193100	0	0	0	1	0	1	0	1	0	0	0	3	0.062484	0.937552	0.018727	0.981273
193230	1	1	1	0	0	1	0	0	0	0	0	4	0.34626	0.653753	0.058005	0.941995
193300	0	0	0	0	0	0	0	1	0	0	1	2	0.009127	0.990912	0.004741	0.995259
193500	1	1	1	1	1	1	1	1	1	1	0	10	0.001447	0.998594	0.001447	0.998594
193530	0	0	0	0	0	0	0	1	0	0	0	1	0.008523	0.991517	0.003665	0.996335
193700	0	1	0	0	0	0	1	1	0	0	0	3	0.001182	0.99886	0.000577	0.999423
193900	1	0	0	0	0	0	0	0	0	1	0	2	0.067467	0.932569	0.043884	0.956116
194070	1	1	1	1	1	1	1	1	1	1	0	10	8.8e-05	0.999943	8.8e-05	0.999943
194080	1	1	1	1	1	1	1	1	1	1	0	10	0.00021	0.999824	0.00021	0.999824
194200	1	1	1	1	1	1	1	1	1	1	1	11	0.001905	0.998136	0.001905	0.998136
194300	1	0	0	0	0	0	0	0	1	1	0	3	0.0098	0.99024	0.004859	0.995141
200100	0	0	0	0	0	0	1	1	0	0	0	2	0.243045	0.756976	0.167745	0.832255
200150	0	0	0	1	0	1	1	0	0	0	0	3	0.49471	0.50529	0.32513	0.67487
200610	0	1	0	1	0	0	0	0	0	1	0	3	0.000783	0.999258	0.00035	0.99965
200700	0	0	0	0	0	0	0	0	1	0	0	1	0.000226	0.999794	0.000165	0.999835
200990	1	1	1	1	1	1	1	0	1	1	0	9	0.446495	0.55351	0.446495	0.55351
201000	1	0	0	0	1	0	1	1	0	0	0	4	0.204629	0.795396	0.135084	0.864916
201100	1	0	0	0	0	0	0	0	0	0	0	1	0.64127	0.358718	0.35212	0.64788
201400	1	1	1	1	1	1	1	1	1	1	0	10	0.105519	0.894513	0.105519	0.894513
201450	1	1	1	1	1	1	1	1	1	1	1	11	0.003202	0.996836	0.003202	0.996836
201470	1	1	1	1	1	1	1	1	1	1	1	11	0.001158	0.998883	0.001158	0.998883
201475	1	1	1	1	1	1	1	1	1	1	1	11	0.001782	0.998259	0.001782	0.998259
201710	1	1	1	1	1	1	1	1	1	1	0	10	0.118339	0.881692	0.118339	0.881692
201750	1	0	0	0	0	0	1	0	0	0	0	2	0.232208	0.767814	0.192878	0.807122
201810	0	0	0	0	0	0	0	1	0	0	0	1	0.158421	0.841608	0.027446	0.972554
202110	0	0	0	0	0	0	0	0	0	0	1	1	0.027057	0.972982	0.010861	0.989139
202200	1	1	1	1	1	1	1	1	1	1	1	11	0.025242	0.974797	0.025242	0.974797
202370	1	1	1	1	1	1	1	1	1	1	1	11	0.001122	0.998906	0.001122	0.998906
202400	1	1	1	1	1	1	1	1	1	1	1	11	0.011875	0.988165	0.011875	0.988165
202650	1	1	1	1	1	1	1	1	1	1	0	10	0.019321	0.980718	0.019321	0.980718
202700	0	0	0	0	0	0	0	1	0	0	0	1	0.523441	0.476557	0.104668	0.895332
203100	0	0	0	0	0	0	1	0	1	0	0	2	0.001126	0.998916	0.000581	0.999419
203200	0	0	0	0	0	0	1	0	0	0	0	1	0.032459	0.96758	0.000414	0.999586
203290	0	0	0	0	0	0	0	1	0	0	0	1	0.001986	0.998055	0.000993	0.999007
203400	0	0	0	0	0	0	1	1	0	0	1	3	0.462224	0.537779	0.089939	0.910061
203450	1	0	0	0	0	1	1	1	0	0	0	4	0.211774	0.78825	0.140317	0.859683
203500	1	1	1	1	1	1	1	1	1	0	1	10	0.052877	0.94716	0.052877	0.94716
203655	0	0	0	0	1	0	0	0	0	0	0	1	0.618638	0.381352	0.400218	0.599782
203700	1	1	1	1	1	1	1	1	1	0	1	10	0.036871	0.963164	0.036871	0.963164
203750	1	1	1	1	1	1	1	1	1	1	1	11	0.023571	0.976468	0.023571	0.976468
203780	1	1	1	1	1	1	1	1	1	1	1	11	0.000825	0.999206	0.000825	0.999206
204000	0	0	0	0	0	0	0	1	1	0	1	3	0.001712	0.998329	0.000866	0.999134
204100	0	0	0	1	0	0	1	1	0	0	0	3	0.081534	0.9185	0.009025	0.990975
204200	0	0	0	0	0	0	1	0	0	0	1	2	0.050855	0.949182	0.002448	0.997552
204300	1	1	1	1	1	1	1	1	1	0	0	9	0.001171	0.99887	0.001171	0.99887
204500	0	0	0	0	0	0	0	1	0	0	1	2	0.009896	0.990144	0.004856	0.995144
205400	1	1	1	1	1	1	1	1	1	1	1	11	0.000322	0.999719	0.000322	0.999719
205950	0	0	0	0	0	0	1	0	0	0	0	1	0.275027	0.724992	0.233774	0.766226
206100	1	1	1	1	1	1	1	1	1	0	1	10	0.010024	0.990016	0.010024	0.990016
206200	1	1	1	1	1	1	1	1	1	1	0	10	0.320146	0.679869	0.320146	0.679869
206800	1	0	0	0	1	0	0	0	0	0	0	2	0.322823	0.677191	0.234554	0.765446
207750	1	1	0	0	0	0	1	1	0	0	0	4	0.035815	0.964224	0.004404	0.995596
207800	1	1	1	1	1	1	1	1	1	0	1	10	0.006769	0.993272	0.006769	0.993272
207900	1	1	1	1	1	1	1	1	1	0	1	10	0.009657	0.990383	0.009657	0.990383
208000	1	0	0	0	0	0	1	0	0	0	1	3	0.220093	0.779931	0.192758	0.807242
208050	0	1	1	0	0	0	0	0	0	0	0	2	0.35126	0.648752	0.248203	0.751797
208085	1	0	0	1	0	1	0	0	0	0	0	3	0.201248	0.798776	0.197066	0.802934
208150	1	1	1	1	1	1	1	1	1	1	0	10	0.075192	0.924843	0.075192	0.924843
208230	0	1	1	0	0	0	0	0	0	0	0	2	0.356347	0.643664	0.19529	0.80471
208400	1	1	1	1	1	1	1	0	1	0	1	9	0.102121	0.897912	0.102121	0.897912
208540	1	1	1	1	1	1	1	1	1	1	0	10	0.000124	0.999917	0.000124	0.999917
208900	0	0	0	0	0	0	1	1	0	0	1	3	0.121726	0.878305	0.009344	0.990656
208920	1	1	1	1	1	1	1	1	1	0	0	9	0.019073	0.980966	0.019073	0.980966
209300	1	1	1	1	1	1	1	1	1	0	1	10	0.005054	0.994986	0.005054	0.994986
209880	1	1	1	1	1	1	1	1	1	1	1	11	0.013224	0.986816	0.013224	0.986816
209900	1	1	1	1	1	1	1	1	1	1	1	11	0.077486	0.922549	0.077486	0.922549
209920	1	1	1	1	1	1	1	1	1	1	1	11	0.138014	0.862016	0.138014	0.862016
209950	0	0	0	0	0	0	1	0	0	0	1	2	0.16126	0.838768	0.161059	0.838941
210200	1	1	1	1	1	1	1	1	1	1	1	11	0.000348	0.999678	0.000348	0.999678
210210	1	1	1	1	1	1	1	0	1	0	1	9	0.035066	0.964972	0.035066	0.964972
210250	1	1	1	1	1	1	1	1	1	1	1	11	0.033131	0.966908	0.033131	0.966908
210370	1	1	1	1	1	1	1	0	1	1	0	9	0.353043	0.646969	0.353043	0.646969
210900	1	1	1	1	1	1	1	1	1	1	1	11	0.003199	0.996842	0.003199	0.996842
211400	0	0	0	0	0	0	0	1	0	0	1	2	0.148733	0.851296	0.03376	0.96624
211600	1	1	1	1	1	1	1	1	1	1	0	10	0.000872	0.999164	0.000872	0.999164
211750	0	0	0	0	0	0	0	0	0	1	0	1	0.970903	0.029058	0.525387	0.474613
211800	1	1	1	0	0	0	0	1	0	0	1	5	0.0828	0.917234	0.024052	0.975948
211900	0	0	1	0	0	0	1	0	0	0	0	2	0.345045	0.654968	0.202178	0.797822
211980	0	0	0	0	0	0	0	1	0	0	0	1	0.432901	0.567104	0.264658	0.735342
212065	0	0	0	1	0	0	1	1	0	0	1	4	0.016211	0.983829	0.002847	0.997153
212066	0	0	1	0	1	0	1	1	0	0	1	5	0.014654	0.985386	0.009131	0.990869
212070	0	0	1	0	0	0	0	1	0	0	0	2	0.458648	0.541356	0.171158	0.828842
212112	1	1	1	1	1	1	1	1	1	1	1	11	0.002389	0.997652	0.002389	0.997652
212140	0	0	0	0	1	0	0	0	0	1	0	2	0.341319	0.658694	0.191902	0.808098
212550	1	1	1	1	1	1	1	1	1	1	0	10	0.04602	0.954017	0.04602	0.954017
212720	0	1	1	1	0	1	0	0	0	0	0	4	0.062402	0.937634	0.058965	0.941035
212780	1	1	1	1	1	1	1	0	1	1	0	9	0.102293	0.89774	0.102293	0.89774
213300	1	1	1	1	1	1	1	1	1	1	1	11	0.323853	0.676161	0.323853	0.676161
213700	1	1	1	1	1	1	1	1	1	1	1	11	0.028107	0.971932	0.028107	0.971932
214100	1	1	1	1	1	1	1	1	1	0	1	10	0.000114	0.999917	0.000114	0.999917
214150	1	1	0	0	1	1	1	1	1	1	0	8	0.018037	0.982003	0.018037	0.982003
214400	1	1	1	1	1	1	1	1	1	1	0	10	0.028929	0.971109	0.028929	0.971109
214500	1	1	1	1	1	1	1	1	1	1	0	10	0.136043	0.863987	0.136043	0.863987
214700	0	0	0	0	0	0	1	0	0	0	1	2	0.04332	0.956718	0.016648	0.983352
214800	1	0	1	0	1	0	1	1	1	0	0	6	0.074624	0.925412	0.063746	0.936254
214950	1	0	1	1	0	0	1	0	0	0	1	5	0.060795	0.939242	0.022999	0.977001
215045	1	1	0	0	0	0	1	0	0	0	0	3	0.098904	0.901129	0.061259	0.938741
215100	1	1	1	1	1	1	1	1	1	1	1	11	0.000124	0.999918	0.000124	0.999918
215150	0	1	0	1	0	0	0	0	1	0	0	3	0.001112	0.998929	0.000639	0.999361
215300	0	0	0	0	0	0	0	0	1	0	0	1	0.001894	0.998147	0.000103	0.999897
215600	0	0	0	0	0	0	0	1	0	1	0	2	0.781782	0.218195	0.505083	0.494917
215700	0	0	0	0	0	0	0	1	0	0	1	2	0.007005	0.993036	0.004398	0.995602
216360	1	1	1	1	1	1	1	1	1	1	0	10	0.005327	0.994713	0.005327	0.994713
216400	1	1	1	1	1	1	1	1	1	1	1	11	0.014893	0.985147	0.014893	0.985147
216550	0	0	0	0	1	0	0	0	0	0	0	1	0.457593	0.542411	0.245506	0.754494
216900	1	1	1	1	1	1	1	1	1	1	1	11	0.001206	0.998835	0.001206	0.998835
217080	1	0	0	0	0	0	1	0	0	0	0	2	0.314932	0.685084	0.172701	0.827299
217090	0	0	0	0	0	0	1	1	0	0	0	2	0.502507	0.497492	0.276038	0.723962
217095	1	1	1	1	1	1	1	1	1	1	0	10	0.009691	0.99035	0.009691	0.99035
217300	0	1	1	0	1	1	0	0	0	0	0	4	0.151127	0.848901	0.147665	0.852335
217400	0	0	1	1	0	0	0	0	0	0	0	2	0.379766	0.620244	0.202021	0.797979
217700	0	0	0	1	0	0	0	0	0	1	0	2	0.264984	0.735035	0.242012	0.757988
217800	0	1	0	0	0	0	0	0	0	0	0	1	0.45572	0.544284	0.290642	0.709358
218040	0	0	0	0	0	0	1	0	0	0	0	1	0.001457	0.998584	0.000332	0.999668
218330	1	0	0	0	1	0	1	0	0	0	0	3	0.153011	0.847018	0.133429	0.866571
218700	1	1	1	1	1	1	1	1	1	1	1	11	0.051724	0.948313	0.051724	0.948313
218800	1	1	1	1	1	1	1	1	1	1	1	11	4.1e-05	1	4.1e-05	1
219000	1	1	1	0	1	1	0	0	0	0	0	5	0.059224	0.940813	0.033736	0.966264
219050	0	0	0	0	0	0	1	1	0	0	0	2	0.229411	0.770612	0.056494	0.943506
219080	1	1	1	1	1	1	1	1	1	1	1	11	0.003162	0.996879	0.003162	0.996879
219100	1	0	1	0	0	0	0	1	0	0	0	3	0.217013	0.78301	0.189042	0.810958
219150	0	0	1	1	0	1	0	0	0	0	1	4	0.187662	0.812364	0.138858	0.861142
219500	1	1	1	1	1	1	1	1	1	0	1	10	0.005836	0.994205	0.005836	0.994205
219700	0	0	1	1	0	0	1	1	0	0	0	4	0.274804	0.725215	0.202718	0.797282
219750	1	1	1	1	1	1	1	1	1	1	1	11	0.00062	0.999421	0.00062	0.999421
219800	0	0	1	0	0	0	1	0	0	0	1	3	0.075893	0.924142	0.03231	0.96769
219900	0	1	0	0	0	0	0	1	0	0	1	3	0.00114	0.998901	0.000886	0.999114
220100	0	0	0	0	0	0	1	0	0	0	0	1	0.209857	0.790167	0.162067	0.837933
220110	1	1	1	1	1	1	1	1	1	0	1	10	0.008168	0.991873	0.008168	0.991873
220111	0	0	0	0	1	1	0	0	0	0	0	2	0.157102	0.842926	0.009406	0.990594
220120	1	0	1	0	0	0	0	0	0	0	1	3	0.230256	0.769766	0.229185	0.770815
220150	0	0	0	0	0	0	1	0	0	0	0	1	0.53405	0.465947	0.400609	0.599391
220290	1	1	1	1	1	1	1	1	1	1	0	10	0.001267	0.998771	0.001267	0.998771
220400	1	1	1	1	1	1	1	1	1	1	1	11	4.1e-05	1	4.1e-05	1
220600	1	1	1	1	1	1	1	1	1	1	0	10	0.020893	0.979146	0.020893	0.979146
221750	1	1	1	1	1	1	1	1	1	1	0	10	0.002885	0.997156	0.002885	0.997156
221770	0	0	0	0	0	0	0	0	1	1	1	3	0.755875	0.244104	0.47396	0.52604
221820	1	1	1	1	1	1	1	1	1	1	1	11	0.112794	0.887238	0.112794	0.887238
222300	0	0	0	0	0	0	0	1	1	0	0	2	0.016704	0.983336	0.002314	0.997686
222448	1	1	1	1	1	1	1	1	1	1	1	11	0.088668	0.911366	0.088668	0.911366
222470	0	0	0	0	1	0	0	0	0	0	0	1	0.451634	0.54837	0.183265	0.816735
222700	0	0	0	0	0	0	1	0	0	1	0	2	0.382508	0.617502	0.297426	0.702574
222765	0	0	0	1	0	0	0	1	0	0	1	3	0.01741	0.98263	0.009399	0.990601
222800	1	1	1	1	1	1	1	1	1	1	1	11	0.01864	0.9814	0.01864	0.9814
222900	0	0	0	0	0	0	0	0	0	0	1	1	0.478069	0.521933	0.465422	0.534578
223000	1	1	1	1	1	1	1	1	1	0	1	10	0.071166	0.928869	0.071166	0.928869
223800	1	1	1	0	1	0	1	0	1	0	0	6	0.010005	0.990035	0.004548	0.995452
223900	0	1	1	0	0	0	1	0	0	0	0	3	0.155691	0.844337	0.130773	0.869227
224100	1	0	0	1	0	0	0	0	0	0	0	2	0.265809	0.73421	0.232608	0.767392
224120	1	1	1	1	1	1	0	1	1	0	0	8	0.127142	0.872889	0.127142	0.872889
224230	1	1	1	1	1	1	1	1	1	0	1	10	0.07757	0.922465	0.07757	0.922465
224690	0	0	0	0	0	0	0	0	0	0	1	1	0.324892	0.675123	0.259222	0.740778
224900	0	1	0	0	0	0	1	1	0	0	1	4	0.00114	0.998901	0.000825	0.999175
225280	1	1	0	0	0	0	0	0	1	0	0	3	0.00177	0.998271	0.001194	0.998806
225300	1	1	0	0	0	0	1	0	0	0	1	4	0.117766	0.882266	0.039804	0.960196
225400	1	0	0	1	0	0	1	0	0	0	0	3	0.173421	0.826606	0.135125	0.864875
225500	0	0	0	0	0	0	0	1	0	0	0	1	0.02342	0.976619	0.010845	0.989155
225750	0	1	0	0	0	0	0	0	0	0	1	2	0.256691	0.743322	0.128667	0.871333
225753	0	0	0	0	0	0	0	1	0	0	0	1	0.005189	0.994852	0.002306	0.997694
226600	0	0	0	0	0	0	0	1	0	0	0	1	0.003685	0.996356	0.001095	0.998905
226650	0	0	0	0	0	0	1	0	0	0	0	1	0.005872	0.994169	0.004329	0.995671
226700	0	0	0	0	0	0	1	0	0	0	1	2	0.012015	0.988025	0.000764	0.999236
226730	1	0	1	1	0	0	1	1	0	0	1	6	0.007124	0.992916	0.00636	0.99364
226900	1	1	1	1	1	1	1	1	1	1	0	10	0.002925	0.997116	0.002925	0.997116
226980	1	1	1	1	1	1	1	1	1	1	1	11	0.052501	0.947536	0.052501	0.947536
227400	1	1	1	1	1	1	1	1	1	1	1	11	0.00085	0.999191	0.00085	0.999191
227500	0	0	0	0	0	0	0	1	0	1	0	2	0.00658	0.993461	0.004041	0.995959
227600	1	1	1	1	1	1	1	1	1	1	1	11	0.00038	0.999662	0.00038	0.999662
227650	0	0	0	0	0	0	0	1	0	0	0	1	0.193197	0.806828	0.128188	0.871812
227810	0	0	0	0	0	0	1	1	0	1	0	3	0.03997	0.960068	0.023609	0.976391
228000	1	0	1	0	0	0	0	1	0	0	1	4	0.020945	0.979095	0.010639	0.989361
228300	1	1	1	1	1	1	1	1	1	1	1	11	0.001982	0.998059	0.001982	0.998059
228520	1	1	1	1	1	1	1	1	1	1	1	11	0.001896	0.998145	0.001896	0.998145
228600	1	1	1	1	1	1	1	1	1	1	0	10	0.002706	0.997335	0.002706	0.997335
228900	1	1	1	1	1	1	1	1	1	1	1	11	0.000103	0.999918	0.000103	0.999918
228930	1	0	0	1	0	0	1	0	0	0	1	4	0.246157	0.753864	0.057202	0.942798
228980	1	1	0	0	0	1	0	0	0	0	1	4	0.268263	0.731756	0.125872	0.874128
229050	1	1	1	1	1	1	1	0	1	1	1	10	0.102691	0.897342	0.102691	0.897342
229070	1	1	1	1	1	1	1	1	1	1	1	11	0.003185	0.996856	0.003185	0.996856
229100	0	1	0	0	0	0	1	1	0	0	1	4	0.152447	0.847582	0.043627	0.956373
229300	1	0	0	0	0	0	1	1	0	0	0	3	0.106799	0.893234	0.092292	0.907708
229600	1	1	1	1	1	1	1	1	1	0	1	10	0.021574	0.978466	0.021574	0.978466
229800	1	1	1	1	1	1	1	1	1	0	1	10	0.126979	0.873052	0.126979	0.873052
230000	1	1	1	1	1	1	1	1	1	0	1	10	0.014738	0.985302	0.014738	0.985302
230200	0	0	0	0	0	0	0	1	0	0	1	2	0.072564	0.927471	0.00611	0.99389
230350	0	0	0	1	0	0	1	0	0	0	1	3	0.065154	0.934882	0.040291	0.959709
230400	0	0	0	0	0	0	1	0	0	0	0	1	0.039602	0.960436	0.007454	0.992546
230450	1	1	1	1	1	1	1	1	1	0	1	10	0.003888	0.996153	0.003888	0.996153
230500	0	0	0	1	0	0	1	0	1	0	0	3	0.007871	0.992168	0.001697	0.998303
230600	0	0	1	0	0	0	1	0	1	0	0	3	0.002276	0.997759	0.001903	0.998097
230650	1	1	1	1	1	1	1	1	1	0	1	10	0.000724	0.999312	0.000724	0.999312
230800	0	0	1	0	0	0	1	0	0	0	1	3	0.002871	0.99717	0.001041	0.998959
230900	1	1	1	1	1	1	1	1	1	0	1	10	4.2e-05	1	4.2e-05	1
231000	1	1	1	1	1	1	1	1	1	0	1	10	0.001681	0.99836	0.001681	0.99836
231050	0	1	0	0	0	0	0	0	0	0	0	1	0.4344	0.565605	0.360727	0.639273
231090	0	0	0	0	0	0	0	0	0	1	0	1	0.812957	0.187017	0.574305	0.425695
231095	0	1	0	0	1	0	0	1	0	0	0	3	0.327596	0.672418	0.219045	0.780955
231200	0	0	0	0	0	0	1	0	0	0	0	1	0.195197	0.804828	0.024979	0.975021
231300	0	0	0	0	0	0	0	1	0	0	0	1	0.296303	0.703693	0.009994	0.990006
231530	0	0	0	1	0	0	1	1	0	0	0	3	0.17169	0.828337	0.133025	0.866975
231550	1	1	1	1	1	1	1	1	1	1	1	11	0.296321	0.703696	0.296321	0.703696
231670	1	1	1	1	1	1	1	1	1	1	1	11	0.007721	0.99232	0.007721	0.99232
231680	1	1	1	1	1	1	1	1	1	0	0	9	0.01957	0.98047	0.01957	0.98047
231690	0	0	1	0	0	0	0	0	0	0	0	1	0.408159	0.591849	0.37894	0.62106
232300	0	0	0	0	0	0	1	0	0	0	1	2	0.200304	0.799721	0.153527	0.846473
232500	1	1	1	1	1	1	1	1	1	1	1	11	0.273421	0.726595	0.273421	0.726595
232700	1	0	1	0	0	0	1	1	0	0	0	4	0.030063	0.969976	0.027932	0.972068
233100	0	0	0	0	1	0	1	0	0	0	0	2	0.461284	0.538719	0.293537	0.706463
233300	1	1	1	1	1	1	1	1	1	1	1	11	0.002207	0.997834	0.002207	0.997834
233400	0	0	1	0	1	0	0	0	0	0	1	3	0.434433	0.565572	0.192292	0.807708
233420	1	1	0	1	0	0	1	1	0	0	0	5	0.06374	0.936296	0.060475	0.939525
233910	0	0	0	0	0	0	0	1	0	0	1	2	0.040423	0.959611	0.012	0.988
234000	1	1	1	1	1	1	1	1	1	1	1	11	0.008412	0.991629	0.008412	0.991629
234100	1	0	0	0	0	1	0	1	0	0	0	3	0.236516	0.763506	0.140921	0.859079
234200	1	1	1	1	1	1	1	1	1	0	1	10	0.342672	0.657341	0.342672	0.657341
234500	0	0	1	0	0	0	0	0	0	0	1	2	0.423242	0.576764	0.350128	0.649872
235200	1	0	0	0	0	0	0	1	0	0	0	2	0.286386	0.713632	0.280127	0.719873
235400	0	0	0	0	0	0	0	1	0	0	0	1	0.303131	0.696886	0.227808	0.772192
235510	1	0	1	0	0	0	0	0	0	0	0	2	0.41424	0.585768	0.252667	0.747333
235555	0	1	1	0	0	1	1	1	0	0	1	6	0.017981	0.982059	0.016075	0.983925
235700	1	1	1	1	1	1	1	0	1	1	1	10	0.142215	0.857815	0.142215	0.857815
235730	0	0	1	0	0	0	1	0	0	0	0	2	0.266492	0.733527	0.137245	0.862755
235800	1	1	1	1	1	1	1	1	1	0	1	10	0.040162	0.959876	0.040162	0.959876
236200	0	0	0	0	0	0	1	0	0	0	1	2	0.444528	0.555477	0.333347	0.666653
236250	0	0	0	0	0	0	1	0	0	0	0	1	0.019792	0.980247	0.019016	0.980984
236270	0	1	0	0	0	0	1	1	0	0	0	3	0.058998	0.941039	0.008967	0.991033
236490	1	1	1	1	1	1	1	1	1	1	0	10	0.001694	0.998347	0.001694	0.998347
236670	1	1	1	1	1	1	1	1	1	1	1	11	0.098931	0.901102	0.098931	0.901102
236680	0	1	0	0	0	0	0	0	1	0	0	2	0.212445	0.787579	0.186322	0.813678
236700	1	1	1	1	1	1	1	1	1	1	0	10	4.1e-05	1	4.1e-05	1
236792	1	1	1	1	1	1	1	0	1	1	1	10	0.112702	0.88733	0.112702	0.88733
237300	1	1	1	1	1	1	1	1	1	1	1	11	0.002212	0.997818	0.002212	0.997818
237310	0	0	0	0	0	0	0	0	0	0	1	1	0.027717	0.972322	0.006181	0.993819
237500	0	1	1	0	0	0	0	0	0	1	1	4	0.00925	0.99079	0.006703	0.993297
237900	1	1	1	1	1	1	1	1	1	1	1	11	8.2e-05	0.999959	8.2e-05	0.999959
238320	1	1	1	1	1	1	1	1	1	1	1	11	0.004854	0.995187	0.004854	0.995187
238600	0	0	0	0	1	0	1	1	0	0	1	4	0.03853	0.961508	0.018591	0.981409
238970	0	0	1	0	0	0	1	0	0	0	0	2	0.202842	0.797183	0.201716	0.798284
239200	0	0	0	0	0	1	1	1	1	0	0	4	0.002033	0.998008	0.001978	0.998022
239300	1	1	1	1	1	1	1	1	1	0	1	10	0.321249	0.678766	0.321249	0.678766
239500	1	0	0	0	0	0	0	1	0	0	1	3	0.045137	0.954901	0.017918	0.982082
239510	1	0	0	0	0	0	1	0	0	1	1	4	0.049635	0.950402	0.041466	0.958534
239850	0	0	1	0	0	1	0	0	0	0	0	2	0.567944	0.43205	0.303263	0.696737
240300	0	0	0	0	0	0	0	0	0	0	1	1	0.494311	0.505689	0.371097	0.628903
240500	0	0	0	0	0	0	0	0	0	0	1	1	0.122068	0.877963	0.04241	0.95759
240600	1	1	1	1	1	1	1	1	1	0	1	10	0.117969	0.882062	0.117969	0.882062
240900	0	0	1	1	0	1	1	0	0	0	0	4	0.06052	0.939516	0.033309	0.966691
241200	0	0	0	0	0	0	1	1	0	0	0	2	0.036438	0.9636	0.009713	0.990287
241530	0	0	0	0	0	0	1	1	0	0	0	2	0.25442	0.745601	0.224753	0.775247
241550	0	0	0	0	0	0	1	1	0	0	1	3	0.146653	0.853355	0.035574	0.964426
241600	0	0	0	0	0	0	0	1	0	0	0	1	0.627353	0.372636	0.433182	0.566818
241850	1	0	0	0	0	0	1	1	0	0	0	3	0.189588	0.810437	0.042108	0.957892
242100	1	1	1	1	1	1	1	1	1	1	1	11	0.116408	0.883624	0.116408	0.883624
242300	1	1	1	1	1	1	1	1	1	1	0	10	0.003352	0.996689	0.003352	0.996689
242500	0	0	0	0	0	0	0	0	1	0	1	2	0.093172	0.906862	0.021344	0.978656
242600	1	1	1	0	0	0	0	0	0	0	0	3	0.257815	0.742184	0.183912	0.816088
242860	0	0	1	0	0	1	1	1	1	0	0	5	0.022491	0.977548	0.010546	0.989454
242900	1	1	1	1	1	1	1	1	1	1	0	10	0.096829	0.903204	0.096829	0.903204
243300	1	1	1	1	1	1	1	1	1	1	0	10	0.000399	0.999629	0.000399	0.999629
243310	0	0	0	0	0	0	0	0	0	0	1	1	0.349117	0.650896	0.311589	0.688411
243500	1	1	1	1	1	1	1	1	1	1	1	11	0.000917	0.999125	0.000917	0.999125
243700	0	0	0	1	0	0	0	0	0	0	0	1	0.551328	0.448668	0.310551	0.689449
243800	0	0	0	0	0	1	0	0	0	0	0	1	0.549983	0.450012	0.319878	0.680122
244200	1	1	1	1	1	1	1	1	1	1	0	10	0.028156	0.971883	0.028156	0.971883
244400	1	1	1	1	1	1	1	1	1	1	1	11	0.020938	0.979102	0.020938	0.979102
245000	1	1	1	1	1	1	1	1	1	1	1	11	0.000808	0.999233	0.000808	0.999233
245200	0	0	0	0	0	0	0	1	0	0	1	2	0.018994	0.981046	0.015719	0.984281
245340	0	0	0	0	0	0	1	0	0	1	0	2	0.752928	0.247051	0.441423	0.558577
245400	0	0	0	0	0	1	1	1	0	0	1	4	0.052255	0.947782	0.044884	0.955116
245590	1	1	1	1	1	1	1	1	1	1	1	11	0.073028	0.927007	0.073028	0.927007
245600	0	0	1	0	0	1	0	0	0	0	0	2	0.58982	0.410173	0.195577	0.804423
245900	1	1	1	1	1	1	1	1	1	0	1	10	0.001472	0.99857	0.001472	0.99857
246200	1	1	1	1	1	1	1	1	1	1	1	11	0.000283	0.999759	0.000283	0.999759
246450	1	0	0	0	0	1	0	1	1	0	1	5	0.026526	0.973513	0.019823	0.980177
247100	1	1	1	0	0	0	0	0	0	0	0	3	0.395653	0.604356	0.197146	0.802854
248190	1	1	1	1	1	1	1	1	1	1	1	11	0.00893	0.99111	0.00893	0.99111
248200	1	1	1	1	1	1	1	1	1	1	1	11	0.346939	0.653072	0.346939	0.653072
248250	0	0	0	0	0	0	1	0	0	0	0	1	0.21709	0.782933	0.153532	0.846468
248300	0	0	0	0	0	0	0	1	0	0	0	1	0.578357	0.421636	0.357646	0.642354
248370	0	0	0	0	1	1	1	1	0	1	1	6	0.008531	0.991499	0.006788	0.993212
248390	0	0	1	1	0	0	0	0	0	0	1	3	0.164896	0.835131	0.084208	0.915792
248450	0	0	0	0	1	0	0	0	0	0	0	1	0.307236	0.69278	0.150953	0.849047
248600	0	0	1	0	0	0	0	1	0	0	1	3	0.014569	0.985471	0.006197	0.993803
249000	1	1	1	1	1	1	1	1	1	0	0	9	0.066276	0.933759	0.066276	0.933759
249100	0	0	0	0	0	0	1	1	0	0	0	2	0.62123	0.378757	0.246604	0.753396
249270	1	1	1	1	1	1	1	0	1	0	1	9	0.069149	0.930887	0.069149	0.930887
249420	1	1	0	0	0	0	1	0	0	0	0	3	0.314434	0.685581	0.076517	0.923483
249700	1	1	1	1	1	1	1	1	1	1	0	10	0.004655	0.995386	0.004655	0.995386
249900	0	0	0	1	0	0	0	1	0	0	1	3	0.026902	0.973138	0.022756	0.977244
250100	0	0	0	0	0	0	0	1	0	1	1	3	0.044488	0.95555	0.026055	0.973945
250620	1	1	1	0	0	0	0	0	0	0	1	4	0.214991	0.785032	0.109871	0.890129
250800	0	0	0	1	0	0	1	0	0	0	0	2	0.352008	0.648005	0.105746	0.894254
250850	1	1	1	1	1	1	1	1	1	0	1	10	0.022979	0.977061	0.022979	0.977061
250940	1	1	1	1	1	1	1	1	1	0	1	10	0.009616	0.990425	0.009616	0.990425
250950	1	0	0	0	0	0	1	1	0	0	1	4	0.014377	0.985664	0.007354	0.992646
251000	0	0	0	0	0	0	1	1	0	0	1	3	0.008178	0.991863	0.005725	0.994275
251100	1	1	1	1	1	1	1	1	1	0	0	9	0.009043	0.990998	0.009043	0.990998
251110	1	1	1	1	1	1	1	1	1	0	1	10	0.014181	0.985859	0.014181	0.985859
251200	0	1	0	0	0	0	0	1	0	0	0	2	0.314576	0.685439	0.19944	0.80056
251290	0	0	0	0	0	0	1	0	0	1	0	2	0.585489	0.414504	0.306315	0.693685
251450	0	0	0	1	0	0	0	0	0	0	0	1	0.245416	0.754605	0.205078	0.794922
251880	1	1	1	1	1	1	1	1	1	0	1	10	0.024533	0.975507	0.024533	0.975507
252010	1	1	1	1	1	1	1	1	1	1	1	11	0.098632	0.9014	0.098632	0.9014
252011	1	1	1	1	1	1	1	1	1	1	1	11	0.208773	0.791251	0.208773	0.791251
252150	0	0	1	0	0	0	1	0	0	0	0	2	0.280609	0.719409	0.213525	0.786475
252500	1	1	1	1	1	1	1	1	1	1	1	11	0.002574	0.997467	0.002574	0.997467
252600	1	1	1	1	1	1	1	1	1	1	1	11	0.002017	0.998024	0.002017	0.998024
252650	1	1	1	1	1	1	1	0	1	1	1	10	0.048257	0.951781	0.048257	0.951781
252900	1	1	1	1	1	1	1	1	1	1	1	11	0.00243	0.997605	0.00243	0.997605
252920	1	0	0	0	0	0	0	1	0	0	1	3	0.013827	0.986214	0.005035	0.994965
252930	0	0	0	0	0	1	0	0	0	0	1	2	0.011498	0.988543	0.006085	0.993915
252940	1	1	1	1	1	1	1	1	1	1	1	11	0.001495	0.998546	0.001495	0.998546
253000	1	1	1	1	1	1	1	1	1	1	1	11	0.004585	0.995451	0.004585	0.995451
253010	0	0	0	1	1	1	1	1	0	0	1	6	0.01548	0.984558	0.007327	0.992673
253200	1	1	1	1	1	1	1	1	1	1	1	11	0.002817	0.997224	0.002817	0.997224
253220	1	1	0	0	0	0	1	0	0	0	1	4	0.021088	0.978951	0.013634	0.986366
253250	1	1	1	1	1	1	1	0	1	1	1	10	0.27659	0.723428	0.27659	0.723428
253270	0	1	0	0	0	0	0	1	0	0	1	3	0.040196	0.959843	0.029504	0.970496
253280	1	1	1	1	1	1	1	1	1	0	1	10	0.022347	0.977693	0.022347	0.977693
253290	1	1	1	1	1	1	1	1	1	1	1	11	0.216125	0.783889	0.216125	0.783889
253310	1	0	1	0	0	1	0	0	0	0	0	3	0.088104	0.911929	0.042343	0.957657
253600	1	1	1	1	1	1	1	1	1	1	0	10	0.074566	0.925469	0.074566	0.925469
253601	0	0	0	0	1	0	0	1	1	1	0	4	0.006085	0.993952	0.002499	0.997501
253700	1	1	1	1	1	1	1	1	1	0	1	10	0.002989	0.997052	0.002989	0.997052
253800	1	1	1	1	1	1	1	1	1	0	0	9	0.01385	0.98619	0.01385	0.98619
254090	1	1	1	1	1	1	1	1	1	1	1	11	0.000158	0.999883	0.000158	0.999883
254110	1	1	1	1	1	1	1	1	1	1	1	11	0.052587	0.94745	0.052587	0.94745
254130	1	1	1	1	1	1	1	1	1	1	0	10	0.006288	0.993753	0.006288	0.993753
254210	0	0	1	1	0	0	1	0	0	0	0	3	0.12252	0.877511	0.047238	0.952762
254300	0	0	1	0	0	0	0	1	0	0	0	2	0.144926	0.855104	0.105446	0.894554
254450	0	0	0	0	0	0	0	1	0	0	1	2	0.47076	0.529242	0.086874	0.913126
254600	1	0	0	0	0	0	0	1	1	0	0	3	0.002639	0.997402	0.001608	0.998392
254770	0	0	0	0	0	1	0	0	0	0	0	1	0.550246	0.44975	0.482327	0.517673
254780	1	1	1	1	1	1	1	1	1	1	1	11	0.305005	0.695011	0.305005	0.695011
254800	1	0	1	1	0	0	0	1	0	0	0	4	0.08889	0.911144	0.018034	0.981966
254900	1	1	1	0	0	0	0	0	0	0	0	3	0.421018	0.578989	0.183433	0.816567
255110	1	1	1	1	1	1	1	1	1	1	1	11	0.006849	0.993192	0.006849	0.993192
255120	1	0	0	0	0	0	1	1	0	1	0	4	0.056768	0.943269	0.036178	0.963822
255200	1	1	1	1	1	1	1	1	1	1	0	10	0.103978	0.896054	0.103978	0.896054
255310	1	0	1	0	0	0	0	1	1	1	0	5	0.009293	0.990747	0.005498	0.994502
255320	1	0	0	1	0	0	1	1	1	0	0	5	0.003589	0.996452	0.001836	0.998164
255700	1	1	1	1	1	1	1	1	1	1	0	10	0.004357	0.995684	0.004357	0.995684
255800	1	1	1	1	1	1	1	1	1	1	1	11	0.03324	0.966798	0.03324	0.966798
256000	1	1	1	1	1	1	1	1	1	0	1	10	0.008154	0.991887	0.008154	0.991887
256040	1	1	1	0	0	1	0	0	0	0	0	4	0.237124	0.762898	0.143861	0.856139
256050	1	1	1	1	1	1	1	1	1	1	0	10	0.004543	0.995498	0.004543	0.995498
256100	1	1	1	1	1	1	1	1	1	1	0	10	0.02121	0.97883	0.02121	0.97883
256300	1	1	1	1	1	1	1	1	1	1	0	10	0.085101	0.914933	0.085101	0.914933
256370	1	1	1	1	1	1	1	1	1	1	0	10	5.7e-05	0.999979	5.7e-05	0.999979
256450	1	0	0	0	0	0	0	1	0	1	0	3	0.04629	0.953747	0.03675	0.96325
256550	1	1	1	1	1	1	1	1	1	0	1	10	0.029524	0.970515	0.029524	0.970515
256600	1	0	0	0	1	0	0	0	0	0	1	3	0.341785	0.658228	0.303712	0.696288
256730	1	1	1	1	1	1	1	1	1	0	1	10	0.005527	0.994514	0.005527	0.994514
256731	0	0	0	0	0	0	1	1	0	0	1	3	0.008903	0.991138	0.004607	0.995393
256800	0	0	0	0	0	0	1	1	0	0	1	3	0.156944	0.843084	0.098297	0.901703
256810	1	0	0	0	0	1	1	0	0	0	0	3	0.554995	0.445001	0.388487	0.611513
256840	0	0	0	0	1	0	0	0	0	1	0	2	0.336463	0.66355	0.132856	0.867144
256850	1	1	1	1	1	1	1	1	1	1	0	10	0.241518	0.758503	0.241518	0.758503
257200	1	1	1	1	1	1	1	1	1	1	1	11	0.002621	0.997421	0.002621	0.997421
257220	1	1	1	1	1	1	1	1	1	1	1	11	0.008534	0.991507	0.008534	0.991507
257270	1	0	0	0	0	0	1	0	0	0	0	2	0.055356	0.94468	0.03175	0.96825
257300	0	0	0	0	0	0	0	0	1	1	0	2	0.002554	0.997488	0.001901	0.998099
257980	1	1	1	1	1	1	1	1	1	1	1	11	0.002061	0.99798	0.002061	0.99798
258450	0	0	0	0	0	1	0	1	1	0	1	4	0.001912	0.998127	0.001383	0.998617
258870	1	1	1	1	1	1	1	1	1	1	1	11	0.088193	0.911841	0.088193	0.911841
258900	1	1	1	1	1	1	1	1	0	0	1	9	0.063373	0.936663	0.063373	0.936663
259100	1	1	1	1	1	1	1	1	1	1	0	10	0.0014	0.998641	0.0014	0.998641
259420	1	1	1	1	1	1	1	1	1	1	1	11	0.000207	0.999824	0.000207	0.999824
259440	0	0	1	1	0	0	0	1	0	0	0	3	0.185782	0.814244	0.175294	0.824706
259600	1	0	1	1	0	0	0	1	0	0	1	5	0.103111	0.896922	0.078739	0.921261
259700	1	0	0	0	0	0	0	1	0	0	1	3	0.170942	0.829085	0.046145	0.953855
259710	1	0	1	0	1	0	1	1	0	0	0	5	0.040868	0.959169	0.018869	0.981131
259730	1	1	1	1	1	1	1	1	1	1	1	11	0.004106	0.995935	0.004106	0.995935
259770	0	0	0	0	0	0	1	1	0	0	0	2	0.059745	0.940291	0.051752	0.948248
259775	1	1	1	0	0	0	0	0	0	0	0	3	0.262065	0.737955	0.183735	0.816265
259900	0	0	0	0	0	0	1	0	0	1	1	3	0.179713	0.820313	0.111012	0.888988
260300	0	1	1	0	0	0	0	1	0	0	0	3	0.221961	0.778062	0.147995	0.852005
260400	0	0	0	0	0	0	1	0	0	0	0	1	0.257081	0.742939	0.083336	0.916664
260920	0	0	0	0	0	0	0	0	0	1	1	2	0.398572	0.601437	0.221369	0.778631
261000	0	1	0	0	0	1	1	1	0	0	0	4	0.012687	0.987353	0.00692	0.99308
261100	0	0	0	0	0	0	0	1	0	0	0	1	0.254621	0.745399	0.249546	0.750454
261500	1	0	1	1	0	0	0	0	1	1	0	5	0.03917	0.960868	0.029923	0.970077
261515	1	1	1	1	1	1	1	1	1	1	1	11	0.008848	0.991193	0.008848	0.991193
261550	0	0	0	0	0	0	1	1	1	0	0	3	0.276789	0.72323	0.148207	0.851793
261600	1	1	1	1	1	1	1	1	1	0	1	10	0.011235	0.988805	0.011235	0.988805
261630	0	0	0	0	0	0	0	0	0	1	1	2	0.067519	0.932517	0.055411	0.944589
261670	1	1	1	1	1	1	1	1	1	1	1	11	0.215142	0.784882	0.215142	0.784882
261740	1	1	1	1	1	1	1	1	1	1	1	11	0.011308	0.988733	0.011308	0.988733
261750	1	1	1	1	1	1	1	1	1	0	1	10	0.032005	0.968033	0.032005	0.968033
262000	0	0	1	1	0	1	0	0	0	0	0	3	0.468281	0.531721	0.230705	0.769295
262190	0	0	0	0	0	0	0	0	0	1	0	1	0.001545	0.998496	0.001138	0.998862
262300	1	1	1	1	1	1	1	1	1	1	0	10	0.00284	0.997201	0.00284	0.997201
262500	0	0	0	0	1	0	1	1	0	1	1	5	0.049528	0.950508	0.004878	0.995122
262600	1	1	1	1	1	1	1	1	1	1	0	10	0.004763	0.995278	0.004763	0.995278
262650	0	0	0	0	0	0	0	1	0	0	0	1	0.00547	0.994571	0.000475	0.999525
262700	1	1	1	1	1	1	1	1	1	1	0	10	0.005499	0.994541	0.005499	0.994541
262850	0	0	0	0	0	0	0	0	0	0	1	1	0.315521	0.684494	0.046808	0.953192
263200	0	0	0	0	1	0	1	0	0	0	0	2	0.478958	0.521043	0.262599	0.737401
263300	1	1	1	1	1	1	1	1	1	1	1	11	0.036606	0.963412	0.036606	0.963412
263400	0	0	0	0	0	0	0	1	0	0	0	1	0.360133	0.639878	0.206023	0.793977
263510	0	0	0	0	0	0	1	0	0	0	1	2	0.402331	0.597677	0.237607	0.762393
263570	0	0	0	0	0	1	0	0	0	0	1	2	0.363619	0.636382	0.083247	0.916753
263700	1	1	1	1	1	1	1	1	1	0	1	10	0.002783	0.997258	0.002783	0.997258
263750	0	0	0	1	0	0	0	0	0	0	0	1	0.462043	0.53796	0.315366	0.684634
263800	0	0	0	1	0	0	0	1	1	1	0	4	0.002509	0.997532	0.001157	0.998843
264070	0	0	1	0	0	0	1	0	0	0	0	2	0.212205	0.787819	0.148585	0.851415
264300	0	0	0	0	0	0	0	1	0	0	0	1	0.148527	0.851502	0.028419	0.971581
264350	0	0	0	0	0	1	0	0	1	0	1	3	0.021679	0.97836	0.011266	0.988734
264470	1	1	1	1	1	1	1	1	1	1	1	11	0.000159	0.999883	0.000159	0.999883
264700	0	0	0	0	0	0	0	1	0	0	0	1	0.034866	0.965173	0.02116	0.97884
264800	1	0	0	1	0	0	0	0	0	0	0	2	0.500675	0.499325	0.249299	0.750701
265000	1	1	1	1	1	1	1	1	1	1	1	11	0.216768	0.783234	0.216768	0.783234
265050	0	1	0	0	0	0	0	0	0	0	0	1	0.633794	0.366195	0.396497	0.603503
265100	0	0	0	0	0	1	0	0	0	0	0	1	0.509347	0.490652	0.151466	0.848534
265120	0	0	0	0	0	1	0	0	0	0	0	1	0.629793	0.370196	0.401329	0.598671
265800	1	1	1	1	1	1	1	1	1	1	1	11	0.09823	0.901803	0.09823	0.901803
266100	1	1	0	0	0	0	0	0	0	0	1	3	0.218629	0.781394	0.131708	0.868292
266120	1	1	1	1	1	1	1	1	1	0	1	10	0.017616	0.982424	0.017616	0.982424
266130	1	1	1	1	1	1	1	1	1	0	1	10	0.08112	0.918914	0.08112	0.918914
266140	0	0	0	0	0	0	0	1	1	0	0	2	0.004947	0.995093	0.00033	0.99967
266150	0	0	0	0	0	0	0	0	1	1	1	3	0.012569	0.987472	0.007938	0.992062
266200	1	1	1	1	1	1	1	0	1	0	1	9	0.090125	0.909908	0.090125	0.909908
266265	0	1	0	1	0	1	0	0	0	0	0	3	0.131235	0.868795	0.130553	0.869447
266500	0	0	1	0	1	0	0	1	0	0	1	4	0.010587	0.989454	0.004837	0.995163
266510	1	1	1	1	1	1	1	1	1	1	1	11	5.2e-05	0.99999	5.2e-05	0.99999
266920	0	0	1	0	0	0	0	0	0	1	0	2	0.44633	0.553675	0.380403	0.619597
267000	0	0	1	0	0	1	0	0	0	0	0	2	0.34468	0.655333	0.195966	0.804034
267300	0	0	0	0	0	0	1	0	0	0	1	2	0.032339	0.9677	0.009603	0.990397
267430	1	0	1	0	0	1	1	0	0	0	0	4	0.27829	0.721729	0.249359	0.750641
267500	1	1	1	1	1	1	1	1	1	1	1	11	0.078447	0.921588	0.078447	0.921588
268000	1	1	1	1	1	1	1	1	1	1	0	10	0.004909	0.995132	0.004909	0.995132
268130	1	0	0	0	0	1	1	1	0	0	0	4	0.139058	0.860971	0.116425	0.883575
268150	0	0	1	0	0	1	0	0	0	0	0	2	0.234077	0.765945	0.139076	0.860924
268300	1	1	1	1	1	1	1	1	1	0	0	9	0.004497	0.995544	0.004497	0.995544
268310	1	1	1	1	1	1	1	1	1	1	0	10	0.009107	0.990933	0.009107	0.990933
268800	1	1	1	1	1	1	1	1	1	0	1	10	0.002729	0.99731	0.002729	0.99731
269150	1	1	1	1	1	1	0	1	1	0	0	8	0.031496	0.968543	0.031496	0.968543
269500	1	1	1	1	1	1	1	1	1	0	0	9	0.008693	0.991347	0.008693	0.991347
269700	1	1	1	1	1	1	1	1	1	0	0	9	0.103804	0.896229	0.103804	0.896229
269920	1	0	0	0	0	0	0	1	0	0	1	3	0.004028	0.996013	0.002028	0.997972
269921	0	0	1	0	0	0	1	0	0	0	0	2	0.065007	0.935029	0.061796	0.938204
270100	0	0	0	0	0	0	1	0	0	0	0	1	0.406977	0.593031	0.389134	0.610866
270200	1	0	0	0	1	0	0	1	0	0	1	4	0.151325	0.848704	0.143935	0.856065
270300	1	0	0	0	0	0	0	0	0	0	0	1	0.763684	0.236294	0.440654	0.559346
270400	1	1	1	1	1	1	1	1	1	0	1	10	0.317055	0.68296	0.317055	0.68296
270420	1	1	0	0	0	0	0	0	1	1	0	4	0.404724	0.595284	0.183175	0.816825
270450	0	0	0	1	0	0	0	0	1	1	0	3	0.017462	0.982578	0.004624	0.995376
270550	0	0	1	0	1	0	1	0	0	0	0	3	0.250212	0.749809	0.171187	0.828813
270685	0	0	0	0	1	0	1	0	0	0	0	2	0.463733	0.53627	0.222244	0.777756
270800	0	1	0	0	0	0	1	0	0	0	0	2	0.51908	0.480918	0.28963	0.71037
271665	1	1	1	1	1	1	1	1	1	1	0	10	0.017357	0.982683	0.017357	0.982683
271900	1	1	1	1	1	1	1	0	1	0	1	9	0.151144	0.848885	0.151144	0.848885
271930	1	1	1	1	1	1	1	1	1	0	1	10	0.133989	0.866042	0.133989	0.866042
272120	0	0	0	0	0	0	1	0	0	0	0	1	0.46593	0.534072	0.428222	0.571778
272200	1	1	1	1	1	1	1	1	1	0	1	10	0.018428	0.981612	0.018428	0.981612
272300	0	0	0	0	0	0	1	0	0	0	0	1	0.275902	0.724117	0.195953	0.804047
272430	0	0	0	0	0	0	0	0	0	1	0	1	0.718383	0.281599	0.581086	0.418914
272750	1	0	1	0	0	0	1	1	0	0	1	5	0.005224	0.994817	0.004457	0.995543
272800	0	0	0	0	0	0	1	0	0	0	0	1	0.000901	0.99914	0.000166	0.999834
273300	1	0	1	1	0	0	0	0	0	1	0	4	0.033725	0.966306	0.03295	0.96705
273750	0	0	0	0	0	0	1	0	0	0	0	1	0.47496	0.525042	0.272353	0.727647
273800	1	0	0	0	0	1	1	1	0	0	1	5	0.072842	0.927193	0.018533	0.981467
274150	1	1	1	1	1	1	1	1	1	1	0	10	0.16509	0.834938	0.16509	0.834938
274400	1	1	1	1	1	1	1	1	1	1	0	10	0.127727	0.872303	0.127727	0.872303
274500	1	1	1	1	1	1	1	1	1	1	1	11	0.020191	0.979849	0.020191	0.979849
274600	1	1	1	1	1	1	1	1	1	1	0	10	0.004203	0.995838	0.004203	0.995838
274800	1	1	1	1	1	1	1	0	1	0	0	8	0.03409	0.965949	0.03409	0.965949
275200	1	1	1	1	1	1	1	1	1	1	1	11	0.006791	0.99325	0.006791	0.99325
275630	0	0	0	0	0	0	1	0	0	0	0	1	0.41246	0.587547	0.34216	0.65784
276300	1	1	1	1	1	1	1	1	1	1	1	11	0.079407	0.920627	0.079407	0.920627
276600	1	1	1	1	1	1	1	1	1	1	1	11	0.025016	0.975024	0.025016	0.975024
276700	1	0	0	0	0	0	1	0	0	0	1	3	0.102525	0.897508	0.082394	0.917606
276710	1	1	1	1	1	1	1	1	1	0	1	10	0.056823	0.943214	0.056823	0.943214
276820	1	1	0	0	0	0	1	0	0	0	0	3	0.067153	0.932882	0.018435	0.981565
276880	1	1	1	1	1	1	1	1	1	0	1	10	0.303406	0.69661	0.303406	0.69661
276900	0	0	1	0	0	0	1	1	0	0	0	3	0.023932	0.976107	0.002271	0.997729
276901	0	0	0	1	1	0	1	1	0	1	0	5	0.010028	0.990013	0.002683	0.997317
276902	0	0	1	0	0	0	1	1	0	0	0	3	0.035505	0.964533	0.00433	0.99567
277000	0	0	0	0	0	0	1	0	0	0	0	1	0.296246	0.703771	0.023107	0.976893
277180	1	1	1	1	1	1	1	1	1	1	1	11	0.003594	0.996447	0.003594	0.996447
277300	1	1	1	1	1	1	1	1	1	1	1	11	0.058247	0.941789	0.058247	0.941789
277400	1	1	1	1	1	1	1	0	1	0	1	9	0.098192	0.901842	0.098192	0.901842
277410	0	0	1	0	0	0	1	1	0	0	0	3	0.035158	0.96488	0.029338	0.970662
277440	1	1	1	1	1	1	1	1	1	1	1	11	0.07767	0.922365	0.07767	0.922365
277450	0	0	0	1	0	0	1	1	0	0	0	3	0.088058	0.911976	0.03982	0.96018
277460	1	1	1	1	1	1	1	1	1	1	0	10	0.190946	0.809079	0.190946	0.809079
277470	0	0	0	0	0	1	0	1	1	0	0	3	0.004956	0.995085	0.002767	0.997233
277480	1	1	0	1	0	1	1	1	0	0	1	7	0.039531	0.960507	0.010928	0.989072
277580	0	0	1	0	0	0	1	1	0	0	0	3	0.328625	0.67139	0.122821	0.877179
277590	1	0	0	0	0	0	1	0	0	0	0	2	0.007774	0.992266	0.003709	0.996291
277600	0	0	0	0	0	0	0	0	1	1	0	2	0.835435	0.164538	0.630346	0.369654
277610	0	0	0	0	1	0	1	0	1	1	0	4	0.001976	0.998065	0.000885	0.999115
277700	1	1	1	1	1	1	1	1	1	1	0	10	0.006253	0.993788	0.006253	0.993788
277900	1	1	1	1	1	1	1	1	1	1	0	10	0.003714	0.996327	0.003714	0.996327
278000	1	1	1	1	1	1	1	1	1	1	1	11	0.076538	0.923497	0.076538	0.923497
278150	1	1	1	1	1	1	1	1	1	1	1	11	0.12393	0.876101	0.12393	0.876101
278300	1	1	1	1	1	1	1	1	1	0	1	10	0.002311	0.99773	0.002311	0.99773
278700	1	1	1	1	1	1	1	1	1	0	1	10	0.003967	0.996074	0.003967	0.996074
278720	0	0	0	0	0	0	0	1	0	0	1	2	0.01025	0.989791	0.003836	0.996164
278730	0	0	0	0	0	0	0	0	1	0	0	1	0.000153	0.999889	0.000144	0.999856
278740	0	1	0	0	0	0	0	1	0	0	1	3	0.010202	0.989839	0.001776	0.998224
278750	1	1	1	1	1	1	1	1	1	0	0	9	0.084254	0.91578	0.084254	0.91578
278760	0	0	0	0	0	0	1	0	0	0	0	1	0.006139	0.993902	0.000165	0.999835
278780	0	0	0	0	0	0	1	0	0	0	0	1	0.006885	0.993156	0.00235	0.99765
280000	0	1	0	0	0	0	0	0	0	0	0	1	0.564491	0.435504	0.235249	0.764751
300000	0	0	1	0	1	0	1	0	0	0	0	3	0.391835	0.608174	0.159846	0.840154
300004	1	0	0	1	0	0	1	0	1	1	0	5	0.058353	0.941683	0.029362	0.970638
300009	1	1	1	1	1	1	1	1	1	1	0	10	0.001501	0.99854	0.001501	0.99854
300049	0	0	0	0	0	0	1	0	0	0	0	1	0.419806	0.580201	0.133375	0.866625
300055	1	1	1	1	1	1	1	1	1	1	0	10	0.157486	0.842542	0.157486	0.842542
300067	0	0	0	0	0	0	1	0	0	0	0	1	0.256481	0.743539	0.13579	0.86421
300068	0	0	1	0	0	0	1	0	1	0	1	4	0.009542	0.990498	0.002631	0.997369
300071	0	0	0	0	0	0	1	0	0	0	0	1	0.221488	0.778535	0.041079	0.958921
300088	0	1	1	0	1	0	0	0	0	0	0	3	0.285023	0.714995	0.227442	0.772558
300100	0	1	1	0	0	0	1	1	0	0	1	5	0.004053	0.995989	0.003379	0.996621
300166	0	1	0	0	0	0	1	0	0	0	0	2	0.283314	0.716704	0.06319	0.93681
300200	1	1	1	1	1	1	1	1	1	1	0	10	0.047639	0.952399	0.047639	0.952399
300215	0	0	0	0	1	0	1	1	0	0	0	3	0.000536	0.999505	0.000433	0.999567
300240	1	1	1	1	1	1	1	1	1	0	0	9	0.000357	0.999684	0.000357	0.999684
300257	1	1	1	0	1	0	0	0	0	0	1	5	0.134187	0.865844	0.066576	0.933424
300263	1	1	1	0	0	0	1	0	0	0	0	4	0.187448	0.812577	0.15273	0.84727
300291	1	1	1	1	1	1	1	1	1	0	1	10	0.009417	0.990624	0.009417	0.990624
300299	1	1	1	1	1	1	1	1	1	1	1	11	8.2e-05	0.999959	8.2e-05	0.999959
300321	0	0	0	0	0	0	0	0	0	0	1	1	0.455127	0.544876	0.238178	0.761822
300322	1	1	1	1	1	1	1	1	1	1	1	11	0.000784	0.999257	0.000784	0.999257
300323	1	1	1	1	1	1	1	1	1	1	1	11	0.001791	0.998251	0.001791	0.998251
300352	1	1	0	0	0	0	1	0	0	1	0	4	0.386559	0.613451	0.171492	0.828508
300354	0	0	0	1	0	0	0	0	0	0	0	1	0.462907	0.537096	0.242233	0.757767
300367	1	1	1	1	1	1	1	1	1	1	0	10	0.002737	0.997304	0.002737	0.997304
300376	0	0	0	0	0	0	1	1	1	1	1	5	0.001228	0.998813	0.00033	0.99967
300387	1	1	1	1	0	0	1	0	0	0	1	6	0.063931	0.936105	0.045865	0.954135
300388	1	0	0	1	0	0	0	0	0	1	0	3	0.48106	0.518942	0.229574	0.770426
300400	1	1	1	1	1	1	1	0	1	1	1	10	0.131334	0.868696	0.131334	0.868696
300419	0	0	0	0	0	0	1	0	0	0	0	1	0.001647	0.998394	0.000371	0.999629
300434	1	0	0	0	0	0	1	0	0	0	0	2	0.751565	0.248415	0.219038	0.780962
300438	1	1	1	1	1	1	1	1	1	1	1	11	0.185503	0.814523	0.185503	0.814523
300489	1	1	1	0	1	0	1	0	0	0	0	5	0.235191	0.764831	0.103518	0.896482
300498	0	0	0	0	0	0	1	0	0	1	0	2	0.880815	0.119153	0.452532	0.547468
300500	0	0	0	0	0	0	1	0	0	0	0	1	0.149036	0.850993	0.021218	0.978782
300510	0	0	0	0	0	0	0	1	0	0	0	1	0.528725	0.471272	0.239987	0.760013
301000	1	1	1	1	1	1	1	1	1	1	1	11	0.00123	0.998812	0.00123	0.998812
301040	1	1	1	1	1	1	1	1	1	1	0	10	0.06498	0.935056	0.06498	0.935056
301050	1	1	1	1	1	1	1	1	1	1	1	11	0.000528	0.999512	0.000528	0.999512
301200	1	1	1	1	1	1	1	1	1	0	0	9	0.185185	0.814841	0.185185	0.814841
301310	1	0	1	1	0	0	0	0	0	0	0	3	0.402018	0.59799	0.201756	0.798244
301500	0	0	1	0	0	0	1	1	0	0	0	3	0.037809	0.96223	0.018508	0.981492
301830	0	0	0	0	0	0	0	1	0	1	0	2	0.668906	0.33108	0.378266	0.621734
301835	1	1	1	1	1	1	1	1	1	1	1	11	0.000701	0.99934	0.000701	0.99934
301900	0	0	0	1	0	0	0	0	0	0	0	1	0.287415	0.712603	0.201595	0.798405
302045	0	0	0	0	0	0	0	1	0	0	1	2	0.178035	0.821992	0.028823	0.971177
302060	1	0	1	0	0	0	1	0	0	0	0	3	0.292016	0.708001	0.113629	0.886371
302800	1	1	1	1	1	1	1	1	1	1	0	10	0.039033	0.961006	0.039033	0.961006
302950	0	0	0	0	0	0	0	0	1	1	0	2	0.015347	0.984693	0.001279	0.998721
302960	1	0	0	0	0	0	0	1	0	0	0	2	0.095415	0.904619	0.060717	0.939283
303100	0	0	0	0	0	0	1	1	0	0	0	2	0.149293	0.850736	0.051294	0.948706
303350	0	0	0	0	0	0	0	0	1	0	0	1	0.004499	0.995543	0.000414	0.999586
303400	0	1	1	1	0	0	0	0	0	0	0	3	0.224595	0.775427	0.163925	0.836075
303600	1	0	1	1	0	0	0	0	1	0	0	4	0.057229	0.942807	0.03178	0.96822
303700	1	1	1	1	1	1	1	0	1	1	0	9	0.00132	0.998721	0.00132	0.998721
303800	1	1	1	1	1	1	1	0	1	1	0	9	0.000894	0.999147	0.000894	0.999147
303900	1	1	1	1	1	1	1	0	1	1	0	9	4.1e-05	1	4.1e-05	1
304110	0	0	0	1	0	0	1	1	0	0	0	3	0.247332	0.752689	0.169448	0.830552
304120	1	1	1	1	1	1	1	1	1	1	1	11	0.000371	0.99967	0.000371	0.99967
304150	0	0	0	0	0	0	0	1	0	0	0	1	0.003903	0.996138	0.001817	0.998183
304400	1	0	0	0	0	0	1	0	0	0	0	2	0.1446	0.85543	0.117242	0.882758
304500	0	0	1	0	0	0	0	0	0	0	1	2	0.348433	0.65158	0.287683	0.712317
304700	1	0	1	1	0	0	1	0	0	0	0	4	0.237936	0.762085	0.152738	0.847262
304790	1	0	0	0	0	0	0	1	0	0	0	2	0.256066	0.743955	0.108913	0.891087
304800	1	1	1	1	1	1	1	1	1	1	1	11	0.104943	0.89509	0.104943	0.89509
305000	1	1	1	1	1	1	1	1	1	0	0	9	0.001368	0.998674	0.001368	0.998674
305100	0	0	0	0	0	0	1	1	0	0	1	3	0.027256	0.972783	0.016924	0.983076
305390	0	0	0	0	1	0	1	0	0	0	0	2	0.124711	0.875316	0.045446	0.954554
305400	0	0	0	0	0	0	1	1	0	0	1	3	0.331366	0.668648	0.172044	0.827956
305450	1	0	0	0	0	0	0	1	0	0	0	2	0.259945	0.740075	0.244116	0.755884
305600	0	0	1	1	0	0	0	1	0	0	0	3	0.331851	0.668163	0.2534	0.7466
305620	1	1	1	1	1	1	1	1	1	1	1	11	0.000186	0.999835	0.000186	0.999835
306400	1	1	1	1	1	1	1	1	1	1	1	11	0.101219	0.898814	0.101219	0.898814
306700	0	0	0	0	0	0	1	1	0	0	1	3	0.178611	0.821416	0.096157	0.903843
306900	1	1	1	1	1	1	1	1	1	1	1	11	0.002615	0.997427	0.002615	0.997427
306955	1	1	1	1	1	1	1	1	1	1	0	10	0.098315	0.901719	0.098315	0.901719
307000	0	0	0	0	0	0	0	0	1	1	0	2	0.006273	0.993767	0.003513	0.996487
307030	1	0	1	0	1	0	0	1	0	0	1	5	0.029829	0.97021	0.026296	0.973704
307800	1	1	1	1	1	1	1	1	1	1	0	10	0.083611	0.916423	0.083611	0.916423
308050	0	0	0	0	0	0	1	1	0	0	1	3	0.120614	0.879417	0.045591	0.954409
308100	1	1	1	1	1	1	1	1	1	1	1	11	0.012382	0.987658	0.012382	0.987658
308205	1	1	1	1	1	1	1	1	1	0	1	10	0.002387	0.997654	0.002387	0.997654
308230	0	0	0	0	1	0	1	0	0	0	1	3	0.034892	0.965146	0.00215	0.99785
308240	1	1	1	1	1	1	1	1	1	1	1	11	0.082447	0.917587	0.082447	0.917587
308300	0	0	0	0	0	0	1	1	0	0	0	2	0.542227	0.45777	0.228437	0.771563
308350	0	0	1	1	0	0	1	0	1	0	0	4	0.000661	0.999381	0.000413	0.999587
308700	0	0	0	0	0	0	0	1	0	0	0	1	0.152765	0.847264	0.079683	0.920317
308800	1	1	1	1	1	1	1	1	1	0	1	10	0.003583	0.996458	0.003583	0.996458
308930	1	0	1	0	0	0	1	1	0	1	0	5	0.031975	0.968063	0.030106	0.969894
309000	1	0	0	0	1	0	1	0	0	0	1	4	0.202797	0.797227	0.128728	0.871272
309300	1	0	0	0	0	0	1	0	0	0	0	2	0.122144	0.877887	0.086987	0.913013
309350	1	1	1	1	1	1	1	1	1	1	1	11	0.000268	0.999753	0.000268	0.999753
309400	1	1	1	1	1	1	1	1	1	1	1	11	0.000333	0.999709	0.000333	0.999709
309520	0	0	1	0	0	0	0	1	0	0	0	2	0.481301	0.5187	0.269193	0.730807
309580	1	1	1	1	1	1	1	1	1	1	0	10	0.000465	0.999577	0.000465	0.999577
309801	0	1	1	1	1	0	0	0	0	0	0	4	0.043364	0.956674	0.018964	0.981036
309900	0	0	0	0	0	0	1	0	0	1	0	2	0.004605	0.995432	0.003027	0.996973
310200	0	0	0	0	1	0	1	0	1	0	1	4	0.00292	0.997121	0.001162	0.998838
310300	0	0	0	0	0	0	0	0	0	0	1	1	0.088547	0.911487	0.027258	0.972742
310400	1	0	1	1	1	0	1	0	0	0	0	5	0.249369	0.750652	0.23282	0.76718
310468	1	1	1	1	1	1	1	1	1	1	0	10	8.2e-05	0.999959	8.2e-05	0.999959
310500	1	1	1	1	1	1	1	1	1	1	0	10	0.190199	0.809827	0.190199	0.809827
310600	0	0	1	0	1	0	1	1	0	0	0	4	0.061199	0.938836	0.045314	0.954686
310700	0	1	0	1	1	0	0	0	0	0	0	3	0.219971	0.780053	0.211233	0.788767
311070	0	0	1	0	0	0	0	0	0	0	1	2	0.504887	0.495113	0.336358	0.663642
311200	0	0	0	0	0	0	0	1	0	0	0	1	0.23752	0.762502	0.230903	0.769097
311250	1	1	1	1	1	1	1	1	1	0	1	10	0.005536	0.994504	0.005536	0.994504
311300	1	0	0	0	0	0	1	0	0	0	0	2	0.00069	0.999341	0.000412	0.999588
312060	1	1	1	1	1	1	1	1	1	1	0	10	0.213789	0.786234	0.213789	0.786234
312080	0	0	0	0	0	0	1	0	0	0	0	1	0.002984	0.997057	0.000166	0.999834
312300	0	0	0	0	0	0	1	0	0	1	0	2	0.005639	0.994402	0.003689	0.996311
312600	1	1	1	1	1	1	1	1	1	0	0	9	0.115565	0.884467	0.115565	0.884467
312700	0	0	1	0	1	0	1	1	0	0	0	4	0.033715	0.966324	0.013206	0.986794
312750	0	0	1	0	0	0	1	1	0	0	0	3	0.172485	0.827542	0.038859	0.961141
312863	0	0	0	0	0	0	0	0	0	1	1	2	0.008834	0.991206	0.001527	0.998473
312870	1	1	1	0	0	0	0	1	0	0	0	4	0.113863	0.886169	0.092269	0.907731
312920	1	1	1	1	1	1	1	1	1	0	0	9	0.006637	0.993404	0.006637	0.993404
313400	1	1	1	1	1	1	1	0	0	0	0	7	0.160045	0.839983	0.160045	0.839983
313500	1	1	1	1	1	1	1	1	1	1	1	11	0.019377	0.980663	0.019377	0.980663
313900	1	1	1	1	1	1	1	1	1	1	1	11	0.001027	0.999015	0.001027	0.999015
314050	1	1	1	1	1	1	1	1	1	1	0	10	0.002767	0.997274	0.002767	0.997274
314200	0	0	0	0	0	0	0	0	0	1	0	1	0.696363	0.303621	0.543523	0.456477
314400	1	0	0	0	0	0	0	1	0	0	1	3	0.163687	0.836341	0.086279	0.913721
600059	1	0	1	1	1	0	0	1	0	0	1	6	0.02861	0.971429	0.018971	0.981029
600060	0	0	1	0	1	1	1	1	1	0	0	6	0.005442	0.994598	0.005133	0.994867
600072	1	0	1	0	0	0	1	0	0	0	0	3	0.269652	0.730346	0.190443	0.809557
600081	1	1	1	1	1	1	1	0	1	1	1	10	0.003995	0.996046	0.003995	0.996046
600101	1	1	1	1	1	1	1	1	1	1	0	10	0.121251	0.87878	0.121251	0.87878
600105	1	1	1	1	1	1	1	1	1	1	0	10	0.090219	0.909814	0.090219	0.909814
600116	1	1	1	1	1	1	1	1	1	1	1	11	0.001876	0.998165	0.001876	0.998165
600121	1	1	1	1	1	1	1	1	1	0	1	10	0.003464	0.996577	0.003464	0.996577
600132	1	0	1	0	0	0	1	1	0	0	0	4	0.051262	0.948775	0.008168	0.991832
600138	1	0	1	0	0	1	0	1	0	0	1	5	0.045097	0.954941	0.016826	0.983174
600143	0	0	0	0	0	0	1	1	0	1	0	3	0.08863	0.911404	0.004711	0.995289
600145	0	0	0	0	0	0	0	0	1	0	0	1	0.016362	0.983678	0.000247	0.999753
600155	0	0	1	0	0	1	1	1	0	0	1	5	0.075316	0.924719	0.054835	0.945165
600195	1	1	1	1	1	1	1	1	1	1	1	11	0.034259	0.96578	0.034259	0.96578
600208	1	1	1	1	1	1	1	1	1	1	1	11	0.001751	0.998269	0.001751	0.998269
600224	1	1	0	0	0	0	1	0	0	0	0	3	0.085885	0.914149	0.032351	0.967649
600251	1	1	1	0	0	0	0	0	0	0	0	3	0.299889	0.700128	0.183712	0.816288
600274	0	0	0	0	0	0	1	0	0	0	0	1	0.003498	0.996543	5.9e-05	0.999941
600309	0	0	0	0	0	0	1	1	0	0	0	2	0.176846	0.82316	0.055689	0.944311
600316	0	0	1	0	0	0	1	0	1	0	0	3	0.015393	0.984647	0.013173	0.986827
600334	1	0	1	0	1	0	1	0	0	0	1	5	0.086704	0.91333	0.013366	0.986634
600363	1	1	1	1	1	1	1	1	1	1	0	10	0.018921	0.981118	0.018921	0.981118
600376	1	1	1	1	1	1	1	0	1	1	0	9	0.030016	0.970023	0.030016	0.970023
600462	1	1	1	1	1	1	1	0	1	0	0	8	0.109069	0.890963	0.109069	0.890963
600496	1	1	1	1	1	1	1	1	1	1	1	11	0.003982	0.996059	0.003982	0.996059
600512	1	0	1	1	1	0	0	0	0	1	0	5	0.281558	0.71846	0.246512	0.753488
600513	1	1	1	1	1	1	1	1	1	1	1	11	0.000579	0.999462	0.000579	0.999462
600625	0	0	1	0	0	0	1	1	0	0	1	4	0.054526	0.945511	0.007196	0.992804
600628	1	1	1	1	1	1	0	0	1	1	0	8	0.003293	0.996748	0.003293	0.996748
600652	1	1	1	1	1	1	1	1	1	1	1	11	0.018172	0.981867	0.018172	0.981867
600721	1	0	0	0	0	0	0	0	0	0	0	1	0.329755	0.67026	0.325825	0.674175
600737	1	1	1	1	1	1	1	1	1	0	1	10	0.007609	0.992432	0.007609	0.992432
600791	1	1	1	1	1	1	1	1	1	1	0	10	0.004204	0.995837	0.004204	0.995837
600794	1	1	1	1	1	1	1	1	1	1	1	11	0.000165	0.999876	0.000165	0.999876
600795	1	0	1	0	0	1	0	0	0	0	1	4	0.276507	0.723511	0.17628	0.82372
600802	1	1	1	1	1	1	1	1	1	1	1	11	0.021673	0.978367	0.021673	0.978367
600803	1	1	1	1	1	1	1	1	1	1	1	11	0.000158	0.999883	0.000158	0.999883
600852	0	0	0	0	0	0	1	0	0	1	0	2	0.675761	0.324224	0.561452	0.438548
600858	1	1	1	1	1	1	1	1	1	1	1	11	0.004732	0.995309	0.004732	0.995309
600882	0	0	0	1	0	0	1	0	0	0	1	3	0.269628	0.730391	0.042962	0.957038
600920	1	0	1	0	0	0	0	0	0	0	0	2	0.467691	0.532312	0.199436	0.800564
600955	0	0	0	0	0	1	1	1	0	0	0	3	0.160637	0.839391	0.132284	0.867716
600962	0	0	0	0	0	0	1	0	0	0	0	1	0.002312	0.997729	0.001363	0.998637
600965	0	0	0	0	0	0	1	0	0	0	1	2	0.338108	0.661906	0.326058	0.673942
600971	1	1	1	1	1	1	1	0	1	0	0	8	0.066381	0.933655	0.066381	0.933655
600972	1	1	1	1	1	1	1	1	1	1	0	10	0.005443	0.994598	0.005443	0.994598
600974	0	0	0	0	0	0	1	0	0	1	0	2	0.079019	0.921016	0.015932	0.984068
600977	0	0	0	0	0	0	0	1	0	0	0	1	0.49314	0.506861	0.375386	0.624614
600995	1	1	1	1	1	1	1	1	1	1	0	10	0.118896	0.881135	0.118896	0.881135
600996	1	1	1	1	1	1	1	1	1	1	1	11	5.2e-05	0.99999	5.2e-05	0.99999
601001	1	1	1	1	1	1	1	1	1	1	0	10	6.2e-05	0.999959	6.2e-05	0.999959
601003	1	1	1	1	1	1	1	1	1	1	1	11	0.056953	0.943084	0.056953	0.943084
601005	1	1	1	1	1	1	1	1	1	1	1	11	0.078371	0.921664	0.078371	0.921664
601067	0	0	0	0	0	0	1	1	0	0	0	2	0.001463	0.998578	0.000619	0.999381
601071	0	0	1	0	0	0	1	0	0	0	0	2	0.035755	0.964283	0.021764	0.978236
601098	0	0	0	0	0	0	1	0	0	0	0	1	0.303657	0.696359	0.287106	0.712894
601104	1	1	1	1	1	1	1	0	1	0	1	9	0.009653	0.990387	0.009653	0.990387
601110	1	1	1	1	1	1	1	1	1	0	1	10	0.00606	0.993981	0.00606	0.993981
601144	0	0	0	0	0	1	1	1	1	1	0	5	0.002251	0.997785	0.000145	0.999855
601152	0	0	0	1	0	0	0	1	0	1	0	3	0.009784	0.990257	0.0047	0.9953
601186	1	1	1	1	1	1	1	1	1	0	0	9	0.244554	0.755467	0.244554	0.755467
601200	0	0	1	0	1	0	1	0	0	1	0	4	0.041737	0.958301	0.035978	0.964022
601238	0	0	0	0	0	0	1	0	0	1	0	2	0.567515	0.432479	0.382229	0.617771
601277	1	1	1	1	1	1	1	0	1	1	1	10	0.005961	0.99408	0.005961	0.99408
601286	0	0	0	0	0	0	1	0	0	0	0	1	0.001421	0.99862	0.000103	0.999897
601287	0	0	1	1	0	0	0	1	1	0	1	5	0.003844	0.996197	0.003286	0.996714
601317	1	1	1	1	1	1	1	1	1	1	0	10	0.000701	0.99934	0.000701	0.99934
601321	0	0	0	0	0	0	1	1	0	0	0	2	0.060895	0.939141	0.022975	0.977025
601331	1	1	1	1	1	1	1	0	1	1	0	9	0.122691	0.87734	0.122691	0.87734
601346	0	0	1	0	1	0	1	0	0	0	0	3	0.253894	0.746126	0.19569	0.80431
601358	1	1	1	1	1	1	1	1	1	1	0	10	0.07757	0.922465	0.07757	0.922465
601369	0	0	0	0	0	0	1	0	0	0	0	1	0.260497	0.739523	0.169088	0.830912
601378	1	1	1	1	1	1	1	1	1	1	0	10	0.021955	0.978084	0.021955	0.978084
601382	1	1	1	1	0	0	0	1	0	0	0	5	0.031235	0.968804	0.017884	0.982116
601386	0	0	0	0	0	0	1	1	0	0	0	2	0.001059	0.998981	0.000784	0.999216
601399	1	1	1	1	1	1	1	1	1	0	0	9	0.096736	0.903298	0.096736	0.903298
601414	1	1	1	0	1	0	0	1	0	0	1	6	0.026601	0.973438	0.02656	0.97344
601419	1	1	1	1	1	1	1	1	1	1	1	11	0.02658	0.973457	0.02658	0.973457
601457	1	1	1	1	1	1	1	1	1	1	1	11	4.1e-05	1	4.1e-05	1
601462	1	1	1	1	1	1	1	1	1	1	1	11	0.000103	0.999938	0.000103	0.999938
601472	1	1	1	1	1	1	1	1	1	1	1	11	0.001647	0.998394	0.001647	0.998394
601492	1	1	1	1	1	1	1	1	1	1	1	11	0.201683	0.798342	0.201683	0.798342
601494	1	0	1	0	0	0	0	0	0	1	1	4	0.007233	0.992808	0.002697	0.997303
601543	0	0	0	0	0	0	1	0	0	0	0	1	0.268479	0.73154	0.246752	0.753248
601544	1	1	1	1	1	1	1	1	1	1	0	10	0.001767	0.998274	0.001767	0.998274
601553	1	1	1	1	1	1	1	1	1	1	1	11	0.000701	0.99934	0.000701	0.99934
601559	0	0	0	0	0	0	0	1	0	0	1	2	0.712534	0.287449	0.317365	0.682635
601596	0	0	0	0	1	1	0	1	0	0	0	3	0.010642	0.989398	0.006237	0.993763
601626	1	1	1	1	1	1	1	1	1	1	1	11	0.009914	0.990117	0.009914	0.990117
601631	1	0	1	0	0	0	1	1	0	0	0	4	0.055153	0.944863	0.021369	0.978631
601665	1	1	1	1	1	1	1	1	1	1	1	11	0.197569	0.802456	0.197569	0.802456
601675	1	1	1	1	1	1	1	1	1	1	1	11	0.002482	0.997559	0.002482	0.997559
601678	1	1	1	1	1	1	1	1	1	1	0	10	4.1e-05	1	4.1e-05	1
601680	0	0	0	0	0	0	1	1	0	0	0	2	0.004287	0.995754	0.002119	0.997881
601776	0	0	0	0	0	0	0	0	0	1	1	2	0.349412	0.6506	0.341105	0.658895
601777	0	0	1	0	0	0	0	1	0	0	1	3	0.033995	0.966043	0.004965	0.995035
601780	0	0	0	0	0	0	1	0	0	0	0	1	0.001736	0.998306	0.000331	0.999669
601813	0	0	0	0	0	0	1	1	0	0	0	2	0.262263	0.737756	0.050836	0.949164
601815	0	0	0	0	0	0	0	0	0	0	1	1	0.163093	0.836935	0.089215	0.910785
601847	1	1	1	1	1	1	1	1	1	1	1	11	0.000295	0.999728	0.000295	0.999728
601859	0	0	0	0	0	0	0	1	0	0	0	1	0.123222	0.876809	0.031206	0.968794
601868	1	0	1	1	0	0	1	0	1	0	1	6	0.063675	0.936361	0.044881	0.955119
601869	1	0	0	1	0	0	0	0	0	0	0	2	0.385461	0.614549	0.238376	0.761624
601884	1	1	1	1	1	1	1	1	1	1	1	11	0.000742	0.9993	0.000742	0.9993
601885	1	1	1	1	1	1	1	1	1	1	0	10	0.000144	0.999897	0.000144	0.999897
601894	1	0	0	0	1	0	0	0	0	0	1	3	0.029852	0.970187	0.027089	0.972911
601977	0	0	1	0	0	0	0	1	0	1	1	4	0.180751	0.819275	0.032802	0.967198
602014	1	0	0	0	0	1	0	0	0	0	1	3	0.245186	0.754836	0.132552	0.867448
602032	0	0	0	0	0	0	0	0	1	0	0	1	0.03155	0.968489	0.00521	0.99479
602066	1	0	0	0	0	0	0	0	0	1	0	2	0.01916	0.980879	0.009436	0.990564
602078	1	1	1	1	1	1	1	1	1	1	0	10	0.048202	0.951835	0.048202	0.951835
602079	0	0	1	0	0	0	0	1	0	1	0	3	0.391282	0.608727	0.316057	0.683943
602080	0	0	1	0	0	0	0	1	0	0	1	3	0.453288	0.546716	0.266455	0.733545
602081	1	1	1	1	1	1	1	1	1	1	0	10	0.05097	0.949067	0.05097	0.949067
602082	1	1	1	1	1	1	1	1	1	0	0	9	0.000124	0.999917	0.000124	0.999917
602083	1	1	1	1	1	1	1	1	1	1	0	10	0.002143	0.997898	0.002143	0.997898
602088	1	1	1	1	1	1	1	1	1	1	0	10	0.007054	0.992987	0.007054	0.992987
602089	0	1	0	1	0	0	1	1	0	0	1	5	0.051054	0.948983	0.025095	0.974905
602093	1	0	0	0	0	0	1	1	0	0	1	4	0.043139	0.956899	0.028945	0.971055
602111	1	1	1	1	1	1	1	1	1	1	0	10	0.029267	0.970772	0.029267	0.970772
602347	1	1	1	1	1	1	1	1	1	1	1	11	0.000186	0.999835	0.000186	0.999835
602390	1	1	1	1	1	1	1	1	1	0	0	9	0.058512	0.941525	0.058512	0.941525
602398	0	0	0	0	0	0	0	1	0	0	1	2	0.061312	0.938724	0.012594	0.987406
602433	0	0	0	0	1	0	1	0	1	0	0	3	0.131322	0.868708	0.026612	0.973388
602459	1	1	0	0	0	0	1	0	0	0	0	3	0.131858	0.868173	0.111259	0.888741
602473	1	0	0	0	0	0	1	0	0	0	0	2	0.176773	0.823253	0.151452	0.848548
602475	0	0	0	0	0	0	1	1	0	0	0	2	0.353793	0.646219	0.111929	0.888071
602481	1	1	1	1	1	1	1	1	1	1	1	11	0.001767	0.998274	0.001767	0.998274
602482	1	1	0	0	0	0	1	0	0	0	0	3	0.142839	0.85719	0.064235	0.935765
602483	1	1	1	0	1	1	0	0	0	0	0	5	0.270654	0.729365	0.069547	0.930453
602485	1	1	1	1	1	1	1	1	1	1	1	11	0.073543	0.926492	0.073543	0.926492
602522	1	1	1	1	1	1	1	1	1	0	0	9	0.030829	0.96921	0.030829	0.96921
602579	0	0	1	0	0	0	1	1	0	0	0	3	0.013102	0.986939	0.007416	0.992584
602588	0	0	1	0	0	0	1	1	0	0	0	3	0.053042	0.946994	0.039462	0.960538
602629	0	0	0	0	0	0	0	1	0	0	0	1	0.418743	0.581264	0.395772	0.604228
602722	1	1	1	1	1	1	1	1	1	0	1	10	0.010501	0.98954	0.010501	0.98954
602723	0	0	0	0	0	0	0	1	0	1	0	2	0.564886	0.435109	0.341769	0.658231
602771	0	0	1	0	0	1	0	0	0	0	0	2	0.367984	0.632027	0.26879	0.73121
602772	0	0	0	0	0	0	1	0	0	1	0	2	0.642163	0.357825	0.443663	0.556337
602782	1	0	0	0	1	0	0	0	0	0	0	2	0.254573	0.745448	0.183051	0.816949
602849	1	0	1	0	0	0	0	1	0	0	1	4	0.003007	0.997034	0.002245	0.997755
602875	0	0	0	0	0	1	1	0	1	1	0	4	0.172516	0.827511	0.052883	0.947117
603034	0	0	1	0	0	0	1	1	0	0	0	3	0.094045	0.905988	0.023134	0.976866
603041	0	0	0	0	0	0	1	1	0	0	0	2	0.03948	0.960558	0.031532	0.968468
603278	1	1	1	1	1	1	1	1	1	1	1	11	0.04129	0.958748	0.04129	0.958748
603358	0	0	1	0	0	0	0	0	0	1	0	2	0.483816	0.516186	0.272807	0.727193
603373	1	1	1	1	1	1	1	1	1	1	1	11	0.000743	0.999299	0.000743	0.999299
603511	1	0	0	1	0	0	0	0	0	0	0	2	0.585911	0.414082	0.349464	0.650536
603513	0	0	0	0	0	1	1	0	0	0	1	3	0.480532	0.519469	0.08675	0.91325
603546	0	0	0	1	1	1	1	0	0	0	0	4	0.064731	0.935305	0.033375	0.966625
603553	0	0	0	0	0	0	0	1	0	0	0	1	0.346341	0.653672	0.243647	0.756353
603554	1	1	1	1	1	1	1	1	1	1	1	11	0.00024	0.999802	0.00024	0.999802
603563	0	0	1	0	0	0	1	0	0	0	0	2	0.238465	0.761557	0.19394	0.80606
603622	1	1	1	1	1	1	1	1	1	1	1	11	0.00363	0.996411	0.00363	0.996411
603649	1	0	0	0	0	0	1	0	0	0	0	2	0.508887	0.491112	0.203228	0.796772
603689	0	1	0	0	0	0	1	0	0	1	0	3	0.003669	0.996371	0.001299	0.998701
603776	0	0	0	0	0	0	1	1	0	0	0	2	0.240948	0.759074	0.041082	0.958918
603786	0	0	0	0	0	0	0	1	0	0	0	1	0.004471	0.99557	0.002774	0.997226
603830	1	1	1	1	1	1	1	1	1	1	0	10	0.000976	0.999065	0.000976	0.999065
603860	1	1	1	1	1	1	1	1	1	1	0	10	0.000605	0.999436	0.000605	0.999436
603896	0	0	1	0	1	0	1	0	0	0	0	3	0.357782	0.64223	0.216651	0.783349
603909	0	0	0	0	0	0	0	1	0	0	0	1	0.582323	0.417671	0.170524	0.829476
603956	0	0	1	0	0	0	1	1	0	0	1	4	0.003594	0.996447	0.003553	0.996447
604004	1	0	1	1	0	0	0	0	0	0	0	3	0.344198	0.655815	0.271711	0.728289
604091	1	1	1	1	1	1	1	1	1	1	1	11	0.000701	0.99934	0.000701	0.99934
604116	0	0	0	0	0	0	1	0	0	0	1	2	0.270536	0.729476	0.080221	0.919779
604145	1	0	0	0	1	0	1	0	0	0	0	3	0.030631	0.969408	0.003829	0.996171
604169	0	0	0	0	0	1	0	1	0	0	0	2	0.391951	0.608058	0.130479	0.869521
604187	0	0	0	0	0	0	1	0	0	0	0	1	0.204387	0.795637	0.182971	0.817029
604218	1	0	1	1	0	0	0	0	0	0	0	3	0.253033	0.746987	0.188821	0.811179
604219	1	1	1	1	1	1	1	1	1	1	1	11	0.019698	0.980342	0.019698	0.980342
604229	1	1	1	1	1	1	1	1	1	1	1	11	0.017779	0.982254	0.017779	0.982254
604233	0	0	0	0	0	0	1	1	0	0	0	2	0.043435	0.956603	0.018084	0.981916
604250	0	0	0	0	0	0	0	1	0	0	0	1	0.370566	0.629445	0.200404	0.799596
604271	0	0	0	0	0	0	0	0	0	1	1	2	0.11719	0.882835	0.083062	0.916938
604273	1	1	1	0	0	0	1	0	0	0	0	4	0.239204	0.760818	0.18359	0.81641
604278	1	1	1	1	1	1	1	1	1	1	1	11	0.053388	0.946649	0.053388	0.946649
604286	0	0	0	0	0	0	0	1	0	0	1	2	0.008999	0.991042	0.005039	0.994961
604292	1	1	1	1	1	1	1	1	1	1	0	10	0.000179	0.999856	0.000179	0.999856
604307	1	1	1	1	1	1	1	1	1	1	0	10	0.000103	0.999918	0.000103	0.999918
604317	0	0	1	0	0	1	0	0	0	0	0	2	0.249965	0.750056	0.195003	0.804997
604320	0	0	0	0	0	0	1	0	0	1	0	2	0.08321	0.916824	0.033218	0.966782
604321	1	1	1	1	1	1	1	1	1	0	0	9	0.090999	0.909035	0.090999	0.909035
604348	0	0	1	0	0	0	0	1	0	0	0	2	0.454433	0.545571	0.237166	0.762834
604356	0	0	0	0	0	0	1	0	0	0	0	1	0.467129	0.532874	0.22006	0.77994
604360	1	1	1	0	0	0	1	1	0	0	0	5	0.06926	0.930775	0.017883	0.982117
604367	0	0	1	0	1	0	1	0	0	1	0	4	0.039672	0.960366	0.038576	0.961424
604369	1	1	1	1	1	1	1	1	1	1	1	11	0.003084	0.996957	0.003084	0.996957
604370	0	0	0	0	0	0	1	1	0	0	0	2	0.263744	0.736262	0.031577	0.968423
604377	0	0	0	0	0	0	1	1	0	0	0	2	0.013795	0.986245	0.004497	0.995503
604379	1	1	1	0	1	0	0	0	0	0	0	4	0.234765	0.765256	0.080378	0.919622
604387	1	1	1	1	1	1	1	1	1	1	0	10	0.001903	0.998138	0.001903	0.998138
604391	0	0	1	0	0	0	0	1	0	0	1	3	0.019055	0.980985	0.003065	0.996935
604393	1	1	1	1	1	1	1	1	1	1	0	10	0.026892	0.973147	0.026892	0.973147
604400	0	0	0	1	1	1	0	0	0	0	0	3	0.181049	0.818978	0.104727	0.895273
604416	0	0	0	0	0	0	0	0	0	0	1	1	0.501793	0.498207	0.432517	0.567483
604559	1	1	1	1	1	1	1	0	1	1	0	9	0.366341	0.63367	0.366341	0.63367
604625	1	1	1	1	1	1	1	1	1	1	0	10	0.015116	0.984924	0.015116	0.984924
604715	1	0	1	0	0	1	0	0	0	0	0	3	0.317802	0.682213	0.183414	0.816586
604717	1	0	0	0	0	0	0	0	0	0	1	2	0.274231	0.725788	0.075715	0.924285
604757	1	1	1	1	1	1	1	1	1	1	0	10	0.004322	0.995719	0.004322	0.995719
604765	1	1	1	1	1	1	1	1	1	1	1	11	0.011344	0.988675	0.011344	0.988675
604772	1	1	1	1	1	1	1	1	1	1	1	11	0.000147	0.999895	0.000147	0.999895
604777	0	1	0	0	0	0	0	0	0	0	0	1	0.339016	0.660997	0.270953	0.729047
604805	0	0	0	0	0	0	1	0	0	0	0	1	0.452129	0.547875	0.272491	0.727509
604841	1	1	1	1	1	1	1	1	1	1	1	11	0.000494	0.999547	0.000494	0.999547
604901	0	0	1	0	0	1	0	0	0	0	0	2	0.202753	0.797271	0.196426	0.803574
605021	0	0	1	0	1	0	0	0	0	0	0	2	0.242213	0.757808	0.196426	0.803574
605027	0	0	0	0	0	1	0	1	0	1	1	4	0.153335	0.846693	0.071717	0.928283
605074	1	1	1	1	1	1	1	1	1	1	1	11	0.005436	0.994603	0.005436	0.994603
605249	1	1	1	1	1	1	1	1	1	1	1	11	8.2e-05	0.999959	8.2e-05	0.999959
605253	1	1	1	1	1	1	1	1	1	1	1	11	0.002421	0.99761	0.002421	0.99761
605258	0	1	1	0	0	0	0	0	0	0	1	3	0.00469	0.995351	0.001978	0.998022
605259	0	0	0	0	0	0	1	0	0	1	0	2	0.269481	0.730538	0.175094	0.824906
605280	0	0	0	1	0	0	0	1	0	1	1	4	0.15196	0.848068	0.054994	0.945006
605282	1	0	1	0	0	0	0	0	0	0	1	3	0.321701	0.678314	0.265337	0.734663
605289	1	0	1	0	1	0	1	0	0	0	0	4	0.135402	0.864628	0.069141	0.930859
605309	1	0	1	1	0	0	1	1	0	0	0	5	0.146938	0.853092	0.076931	0.923069
605361	0	0	0	0	0	0	1	1	0	0	1	3	0.119407	0.880625	0.104964	0.895036
605375	0	1	0	0	0	0	1	1	0	1	1	5	0.001716	0.998325	0.001489	0.998511
605376	1	0	1	0	0	0	0	0	0	0	0	2	0.360596	0.639415	0.20369	0.79631
605387	1	0	1	0	1	0	0	0	0	0	0	3	0.322079	0.677936	0.148	0.852
605389	0	0	0	0	0	0	1	0	0	0	0	1	0.529788	0.47021	0.431375	0.568625
605407	0	0	0	0	0	0	0	0	0	0	1	1	0.144216	0.855814	0.017263	0.982737
605462	0	0	0	0	0	0	0	1	1	0	0	2	0.002266	0.997775	0.002019	0.997981
605472	1	1	1	0	0	0	1	1	0	0	0	5	0.011485	0.988555	0.007093	0.992907
605479	1	1	1	1	1	1	1	1	1	1	1	11	0.000271	0.999753	0.000271	0.999753
605583	0	0	1	0	0	0	1	0	0	0	0	2	0.300812	0.699205	0.202979	0.797021
605588	1	1	1	1	1	1	1	1	1	1	1	11	0.137911	0.862119	0.137911	0.862119
605589	0	0	0	0	0	1	0	0	0	0	0	1	0.657444	0.342543	0.190506	0.809494
605594	1	0	0	0	0	0	0	0	0	0	0	1	0.467355	0.532638	0.272337	0.727663
605637	1	0	0	0	0	1	0	0	1	1	0	4	0.009695	0.990346	0.006188	0.993812
605711	1	1	1	1	1	1	1	1	1	0	0	9	0.036784	0.963255	0.036784	0.963255
605714	0	0	1	0	0	0	1	1	0	0	1	4	0.079275	0.92076	0.076527	0.923473
605724	0	0	0	0	0	0	1	0	0	0	0	1	0.131659	0.868371	0.013515	0.986485
605751	0	1	0	0	0	0	0	0	0	1	0	2	0.012341	0.9877	0.00908	0.99092
605814	1	0	0	0	0	1	1	0	0	0	0	3	0.166962	0.833066	0.082616	0.917384
605820	1	1	1	1	1	1	1	1	1	0	1	10	0.005801	0.99424	0.005801	0.99424
605850	0	0	0	0	1	0	0	1	0	0	1	3	0.051913	0.948124	0.004123	0.995877
605899	1	1	1	1	1	1	1	1	1	1	1	11	0.060255	0.939782	0.060255	0.939782
605911	1	0	0	0	0	0	0	1	0	0	1	3	0.128907	0.871124	0.072174	0.927826
606002	0	0	0	0	0	0	1	1	0	0	0	2	0.167562	0.832465	0.106397	0.893603
606054	0	0	0	0	0	0	1	1	0	0	1	3	0.009494	0.990547	0.006576	0.993424
606056	1	1	1	1	1	1	1	1	1	0	1	10	0.199436	0.800589	0.199436	0.800589
606069	0	0	0	0	0	0	1	1	0	0	1	3	0.025683	0.974356	0.015748	0.984252
606070	1	0	0	0	1	1	0	0	0	0	0	3	0.159378	0.84065	0.066321	0.933679
606071	0	0	0	0	0	0	1	0	0	0	0	1	0.431397	0.568598	0.179951	0.820049
606072	1	1	1	1	1	1	1	1	1	0	1	10	0.006322	0.993715	0.006322	0.993715
606159	0	0	0	1	0	1	0	0	0	0	0	2	0.509684	0.490315	0.193563	0.806437
606176	0	0	0	0	0	0	1	0	0	0	1	2	0.150632	0.849397	0.043317	0.956683
606324	1	0	0	0	0	1	1	1	0	0	1	5	0.010972	0.989068	0.001735	0.998265
606392	0	0	0	0	0	0	0	0	0	0	1	1	0.005847	0.994194	0.004622	0.995378
606394	1	1	1	1	1	1	1	1	1	1	1	11	0.000909	0.999133	0.000909	0.999133
606482	0	0	1	1	0	0	1	0	0	1	1	5	0.10679	0.893243	0.078735	0.921265
606574	0	0	0	0	0	0	1	1	0	0	0	2	0.036001	0.964037	0.019031	0.980969
606593	1	1	1	1	1	1	1	1	1	1	1	11	0.041435	0.958603	0.041435	0.958603
606595	1	1	1	1	1	1	1	1	1	1	1	11	0.006084	0.993946	0.006084	0.993946
606612	0	0	1	0	1	0	0	1	1	0	0	4	0.016052	0.983988	0.006935	0.993065
606664	0	0	0	0	0	0	1	1	0	0	0	2	0.049055	0.950982	0.034268	0.965732
606685	1	1	1	1	1	1	1	1	1	0	1	10	0.027552	0.972487	0.027552	0.972487
606690	1	1	1	1	1	1	1	1	1	1	1	11	0.073951	0.926084	0.073951	0.926084
606705	0	0	1	0	1	0	1	0	0	0	0	3	0.041713	0.958325	0.006471	0.993529
606713	1	0	1	0	0	1	0	0	0	0	0	3	0.384711	0.615299	0.18281	0.81719
606719	1	1	1	1	1	1	1	1	1	1	1	11	0.005442	0.994599	0.005442	0.994599
606762	0	0	1	0	0	1	1	1	0	0	0	4	0.035384	0.964654	0.03085	0.96915
606764	1	1	1	1	1	1	1	1	1	1	1	11	0.004816	0.995225	0.004816	0.995225
606777	0	0	1	0	0	0	1	1	0	1	0	4	0.24241	0.757612	0.201089	0.798911
606785	0	0	0	0	0	0	0	0	1	0	1	2	0.002577	0.997462	0.001713	0.998287
606812	1	1	1	1	1	1	1	1	1	0	1	10	0.01054	0.989495	0.01054	0.989495
606824	1	0	1	0	0	0	1	0	0	0	1	4	0.276237	0.723782	0.160956	0.839044
606835	0	0	1	1	0	0	0	0	0	0	0	2	0.256765	0.743255	0.193546	0.806454
606843	1	1	1	1	1	1	1	1	1	1	1	11	0.001693	0.998349	0.001693	0.998349
606854	0	1	0	0	0	0	0	0	0	0	0	1	0.419119	0.580888	0.32242	0.67758
606889	1	1	1	1	1	1	1	1	1	0	1	10	0.002758	0.997283	0.002758	0.997283
606937	0	0	0	0	0	1	1	0	0	0	0	2	0.584822	0.415171	0.224005	0.775995
606943	1	1	1	1	0	0	1	0	0	0	0	5	0.005589	0.994451	0.00231	0.99769
606952	1	1	1	1	1	1	1	1	1	0	1	10	0.001131	0.99891	0.001131	0.99891
606966	0	0	0	0	0	0	1	1	1	0	0	3	0.004007	0.996034	0.000371	0.999629
606996	0	0	0	0	0	0	1	1	0	0	0	2	0.281198	0.71882	0.132238	0.867762
607014	0	0	0	0	0	0	0	0	0	0	1	1	0.009033	0.991005	0.005111	0.994889
607015	0	0	0	0	0	0	1	0	0	0	0	1	0.00709	0.992951	0.002277	0.997723
607060	0	0	0	0	0	0	0	1	0	0	1	2	0.03437	0.965668	0.001033	0.998967
607078	0	0	0	0	0	0	0	1	0	1	0	2	0.003136	0.996905	0.002267	0.997733
607115	1	1	1	1	1	1	1	1	1	1	1	11	0.006949	0.99309	0.006949	0.99309
607143	0	0	0	0	0	0	1	0	0	0	1	2	0.049975	0.950062	0.030347	0.969653
607155	0	0	1	0	0	0	0	1	1	0	0	3	0.023761	0.976278	0.005492	0.994508
607196	0	0	1	0	0	1	0	0	0	0	0	2	0.481236	0.518766	0.195613	0.804387
607200	1	1	1	1	1	1	1	0	1	1	0	9	0.037103	0.962935	0.037103	0.962935
607208	0	0	0	0	0	0	1	1	0	1	0	3	0.017831	0.982209	0.011683	0.988317
607250	1	1	1	0	0	0	1	0	0	0	0	4	0.115748	0.884284	0.062802	0.937198
607259	1	1	1	1	1	1	1	1	1	1	0	10	0.006949	0.993092	0.006949	0.993092
607271	1	0	1	0	0	0	1	1	0	0	0	4	0.108277	0.891756	0.082353	0.917647
607313	0	0	0	0	0	0	0	0	1	1	1	3	0.083512	0.916522	0.023632	0.976368
607323	1	1	1	1	1	1	1	1	1	1	0	10	0.007751	0.99229	0.007751	0.99229
607326	0	0	1	0	0	0	1	0	0	0	0	2	0.022286	0.977753	0.007257	0.992743
607330	0	0	1	0	1	0	0	0	0	0	1	3	0.135854	0.864176	0.038694	0.961306
607361	1	1	1	1	1	1	1	1	1	0	0	9	0.001025	0.999017	0.001025	0.999017
607364	1	1	1	1	1	1	1	1	1	1	1	11	0.008186	0.991855	0.008186	0.991855
607371	1	0	0	0	0	0	0	0	0	0	1	2	0.341909	0.658104	0.21207	0.78793
607426	1	1	1	1	1	1	1	1	1	0	1	10	0.024664	0.975375	0.024664	0.975375
607432	1	1	1	1	1	1	1	1	1	1	1	11	0.055821	0.944215	0.055821	0.944215
607450	0	0	0	0	0	0	1	0	0	0	1	2	0.328166	0.671849	0.10623	0.89377
607459	1	1	1	1	1	1	1	1	1	0	1	10	0.132595	0.867425	0.132595	0.867425
607473	1	0	0	0	0	0	0	0	0	0	0	1	0.770534	0.229444	0.51917	0.48083
607475	1	1	1	0	0	0	1	0	0	0	0	4	0.193156	0.806869	0.062523	0.937477
607482	0	0	0	1	1	0	1	1	0	0	0	4	0.045251	0.954787	0.026413	0.973587
607485	0	1	0	0	0	0	0	0	0	0	0	1	0.584145	0.415848	0.384393	0.615607
607487	0	0	0	0	1	0	1	0	0	0	0	2	0.044393	0.955645	0.017168	0.982832
607541	1	1	1	1	1	1	1	1	1	0	0	9	0.000124	0.999917	0.000124	0.999917
607554	1	1	1	1	1	1	1	1	1	1	1	11	0.000578	0.999463	0.000578	0.999463
607595	1	1	1	0	0	0	0	0	0	0	1	4	0.149196	0.850833	0.065984	0.934016
607602	1	1	1	1	1	1	1	1	1	1	1	11	0.001914	0.998127	0.001914	0.998127
607616	1	1	1	1	1	1	1	1	1	1	1	11	0.002189	0.997852	0.002189	0.997852
607624	1	1	1	1	1	1	1	1	1	1	0	10	0.016802	0.983238	0.016802	0.983238
607625	1	1	1	1	1	1	1	1	1	0	1	10	0.008675	0.991366	0.008675	0.991366
607634	0	1	0	1	0	0	1	1	0	0	0	4	0.000796	0.999245	0.000783	0.999217
607641	1	1	1	1	1	1	1	1	1	1	1	11	0.015846	0.984194	0.015846	0.984194
607655	0	1	1	0	0	0	1	0	1	0	1	5	0.011582	0.988458	0.007722	0.992278
607677	1	1	1	1	1	1	1	1	1	1	1	11	0.00153	0.998511	0.00153	0.998511
607678	1	1	1	1	1	1	1	1	1	1	0	10	0.099216	0.90081	0.099216	0.90081
607681	1	1	1	1	1	1	1	1	1	1	1	11	0.016386	0.983654	0.016386	0.983654
607688	0	0	0	0	0	0	1	0	0	0	0	1	0.630242	0.369747	0.475064	0.524936
607694	1	1	1	1	1	1	1	1	1	0	1	10	0.131478	0.868553	0.131478	0.868553
607721	1	0	1	0	0	0	0	1	0	0	0	3	0.387866	0.612143	0.240228	0.759772
607736	1	0	0	0	1	0	0	0	1	0	1	4	0.001674	0.998368	0.00157	0.99843
607745	0	0	0	0	0	0	1	1	0	1	0	3	0.071662	0.928373	0.039285	0.960715
607748	1	1	1	1	1	1	1	1	1	1	1	11	0.239303	0.760718	0.239303	0.760718
607765	0	1	1	0	0	0	0	0	0	0	1	3	0.015108	0.984932	0.014634	0.985366
607778	0	0	1	0	0	0	1	1	0	0	1	4	0.103152	0.896881	0.020317	0.979683
607785	0	0	1	0	0	0	1	0	0	0	0	2	0.790603	0.209373	0.222389	0.777611
607801	1	1	1	1	1	1	1	1	1	0	1	10	0.00499	0.995047	0.00499	0.995047
607812	0	0	1	0	0	0	0	0	0	0	1	2	0.462292	0.537711	0.133089	0.866911
607822	0	0	0	0	0	0	0	0	1	0	0	1	0.00065	0.999392	8.3e-05	0.999917
607823	1	0	0	0	0	0	1	1	0	0	0	3	0.350231	0.649782	0.138429	0.861571
607831	1	1	1	1	1	1	1	1	1	1	0	10	0.002391	0.99765	0.002391	0.99765
607841	0	0	0	0	0	0	1	0	1	0	0	2	0.007845	0.992196	0.002821	0.997179
607847	1	1	1	1	1	1	1	1	1	1	0	10	0.103651	0.896381	0.103651	0.896381
607855	0	0	1	0	1	0	0	1	0	0	1	4	0.008004	0.992037	0.007034	0.992966
607932	1	1	1	1	1	1	1	1	1	1	1	11	0.006839	0.993202	0.006839	0.993202
607941	0	0	0	0	0	0	1	0	0	1	0	2	0.002333	0.997708	0.001817	0.998183
607944	0	0	1	0	0	0	1	0	0	0	1	3	0.387183	0.612826	0.295635	0.704365
608022	1	1	1	1	1	1	1	1	1	1	0	10	0.020096	0.979943	0.020096	0.979943
608030	0	0	0	0	0	0	0	1	0	0	0	1	0.544687	0.45531	0.394423	0.605577
608033	0	0	0	0	0	0	0	1	0	0	0	1	0.412598	0.587409	0.151446	0.848554
608051	0	0	0	0	0	0	1	0	0	0	0	1	0.004716	0.995325	0.000579	0.999421
608093	0	0	1	0	1	0	0	1	0	0	1	4	0.036108	0.96393	0.014657	0.985343
608097	0	0	0	0	1	1	1	0	0	0	0	3	0.317237	0.682778	0.01642	0.98358
608099	0	0	0	0	0	0	0	1	0	0	1	2	0.044426	0.955612	0.006694	0.993306
608104	1	1	1	1	1	1	1	1	1	0	1	10	0.022644	0.977396	0.022644	0.977396
608106	1	1	1	1	1	1	1	1	1	0	1	10	0.007663	0.992378	0.007663	0.992378
608115	1	1	1	1	1	1	1	1	1	1	1	11	0.000726	0.999315	0.000726	0.999315
608189	0	0	0	0	0	0	0	1	0	0	0	1	0.0707	0.929336	0.016941	0.983059
608194	0	0	0	0	0	0	1	1	0	0	0	2	0.229227	0.770795	0.047623	0.952377
608203	1	1	1	1	1	1	1	1	1	1	1	11	0.04287	0.957168	0.04287	0.957168
608233	1	0	0	0	1	0	1	1	0	1	1	6	0.042125	0.957913	0.015973	0.984027
608236	1	1	1	1	1	1	1	0	1	1	0	9	0.122301	0.87773	0.122301	0.87773
608323	0	0	1	1	0	0	0	0	0	0	1	3	0.037799	0.962239	0.024299	0.975701
608354	1	1	1	1	1	1	1	1	1	1	1	11	0.06863	0.931406	0.06863	0.931406
608358	1	1	1	1	1	1	1	1	1	1	1	11	0.000506	0.999525	0.000506	0.999525
608380	0	0	0	0	0	1	0	0	0	0	0	1	0.452264	0.54774	0.222382	0.777618
608389	1	1	1	1	1	1	1	1	1	1	0	10	0.019272	0.980768	0.019272	0.980768
608390	1	1	1	1	1	1	1	1	1	1	0	10	0.00015	0.999892	0.00015	0.999892
608393	1	1	1	1	1	1	1	1	1	0	0	9	0.009507	0.990533	0.009507	0.990533
608404	0	0	0	0	0	0	0	0	0	0	1	1	0.142055	0.857975	0.119873	0.880127
608415	1	1	1	1	1	1	1	1	1	1	1	11	0.040358	0.95968	0.040358	0.95968
608454	0	0	0	0	0	1	0	0	0	0	0	1	0.652117	0.347871	0.399337	0.600663
608456	0	1	1	0	0	0	0	1	0	0	0	3	0.129199	0.870831	0.102875	0.897125
608470	1	1	1	1	1	1	1	1	1	0	0	9	8.2e-05	0.999959	8.2e-05	0.999959
608540	0	0	0	0	0	0	1	0	0	0	0	1	0.136304	0.863726	0.008565	0.991435
608569	0	0	0	1	0	0	0	0	0	0	0	1	0.563013	0.436982	0.299006	0.700994
608594	0	0	0	0	0	0	0	1	0	0	0	1	0.242567	0.757454	0.14304	0.85696
608611	1	1	1	1	1	1	1	1	1	0	1	10	0.068707	0.931329	0.068707	0.931329
608612	1	1	1	1	1	1	1	1	1	0	0	9	0.057605	0.942431	0.057605	0.942431
608627	1	1	1	1	1	1	1	1	1	1	0	10	4.1e-05	1	4.1e-05	1
608629	1	1	1	1	1	1	1	1	1	1	0	10	0.017145	0.982895	0.017145	0.982895
608634	0	0	0	0	0	0	0	0	0	1	0	1	0.001513	0.998528	0.000947	0.999053
608643	1	0	0	0	0	0	1	1	0	0	1	4	0.124488	0.875543	0.103694	0.896306
608644	1	1	1	1	1	1	1	1	1	1	0	10	0.000537	0.999505	0.000537	0.999505
608649	0	0	1	1	0	0	1	0	0	0	0	3	0.276988	0.723031	0.202238	0.797762
608654	1	1	1	1	1	1	1	1	1	0	1	10	0.055901	0.944135	0.055901	0.944135
608673	1	0	1	0	1	0	0	1	0	0	0	4	0.286176	0.713821	0.145795	0.854205
608688	1	1	1	1	1	1	1	1	1	0	1	10	0.006261	0.99378	0.006261	0.99378
608709	0	0	0	0	0	0	0	0	0	1	0	1	0.030905	0.969134	0.004099	0.995901
608728	1	1	1	1	1	1	1	1	1	1	0	10	0.005359	0.994682	0.005359	0.994682
608751	0	0	1	1	0	0	1	1	0	0	1	5	0.001634	0.998407	0.000517	0.999483
608758	1	1	1	1	1	1	1	1	1	1	1	11	0.002309	0.997732	0.002309	0.997732
608776	1	1	1	1	1	1	1	0	1	0	1	9	0.154599	0.84543	0.154599	0.84543
608799	0	0	0	0	0	0	1	0	0	0	1	2	0.005058	0.994983	0.001259	0.998741
608804	1	0	0	0	0	0	1	0	0	0	0	2	0.522161	0.477837	0.279054	0.720946
608808	0	0	0	0	1	0	0	0	0	0	0	1	0.45029	0.549714	0.222153	0.777847
608810	1	1	1	0	0	0	1	0	0	0	0	4	0.192972	0.807054	0.071399	0.928601
608812	1	0	0	0	1	1	0	0	0	0	0	3	0.497025	0.502975	0.284901	0.715099
608837	1	1	0	0	0	0	0	0	0	0	1	3	0.004651	0.99539	0.002799	0.997201
608840	1	1	1	1	1	1	1	1	1	1	0	10	0.104679	0.895353	0.104679	0.895353
608864	1	1	1	1	1	1	1	1	1	1	0	10	0.000372	0.999669	0.000372	0.999669
608874	1	1	1	1	1	1	1	1	1	1	0	10	0.0024	0.997642	0.0024	0.997642
608895	0	0	0	0	0	1	0	0	1	1	0	3	0.07002	0.930016	0.012876	0.987124
608930	0	0	0	0	0	0	1	0	1	0	0	2	0.000124	0.999917	0.00011	0.99989
608931	1	1	1	1	1	1	1	1	1	1	1	11	0.021413	0.978627	0.021413	0.978627
608957	1	1	1	1	1	1	1	1	1	1	1	11	0.010507	0.989533	0.010507	0.989533
608967	1	1	1	1	1	1	1	1	1	1	1	11	0.033212	0.966827	0.033212	0.966827
608978	0	1	0	0	0	0	1	0	0	0	0	2	0.002226	0.997794	0.001134	0.998866
608980	0	1	1	0	0	0	0	0	0	0	0	2	0.331411	0.668602	0.195915	0.804085
608983	0	0	0	0	0	0	0	0	1	0	0	1	0.001154	0.998888	6.2e-05	0.999938
608984	0	0	0	1	0	0	0	0	0	0	0	1	0.434568	0.565438	0.293076	0.706924
608996	1	1	1	1	1	1	1	1	1	1	0	10	0.008319	0.991722	0.008319	0.991722
609006	0	0	0	0	0	0	1	0	0	0	0	1	0.433682	0.566323	0.398141	0.601859
609015	1	1	1	1	1	1	1	1	1	1	1	11	0.005797	0.994244	0.005797	0.994244
609016	0	0	0	0	1	0	1	0	1	0	0	3	0.000635	0.999406	0.000455	0.999545

## Sheet: Table S2 (C)
Distinct subsets of data sources being selected (1: selected, 0: unselected)
SIFT	PolyPhen2	LRT	MutationTaster	GERP	PhyloP	GO	PPI	Seq	PFAM	KEGG	Number of data sources in the subset	Number of diseases selected the subset
1	1	1	1	1	1	1	1	1	1	1	11	273
1	1	1	1	1	1	1	1	1	1	0	10	175
1	1	1	1	1	1	1	1	1	0	1	10	82
0	0	0	0	0	0	1	0	0	0	0	1	61
0	0	0	0	0	0	0	1	0	0	0	1	45
0	0	0	0	0	0	1	1	0	0	0	2	44
1	1	1	1	1	1	1	1	1	0	0	9	36
0	0	0	0	0	0	0	1	0	0	1	2	22
0	0	0	0	0	0	0	0	0	0	1	1	21
0	0	0	0	0	0	1	0	0	0	1	2	19
0	0	1	0	0	0	1	0	0	0	0	2	16
0	0	0	0	0	0	1	1	0	0	1	3	15
0	0	0	0	0	0	1	0	0	1	0	2	14
1	1	1	1	1	1	1	0	1	1	0	9	13
0	0	1	0	0	0	1	1	0	0	0	3	13
1	0	0	0	0	0	1	0	0	0	0	2	11
0	0	0	0	0	0	0	0	1	0	0	1	11
1	1	1	1	1	1	1	0	1	1	1	10	10
0	0	0	0	0	0	0	1	0	1	0	2	10
0	0	0	0	0	0	0	0	0	1	0	1	10
0	0	0	1	0	0	0	0	0	0	0	1	10
1	1	1	1	1	1	1	0	1	0	1	9	9
0	0	1	0	0	1	0	0	0	0	0	2	9
0	0	0	0	0	1	0	0	0	0	0	1	8
0	0	0	0	0	0	1	1	0	1	0	3	7
1	0	0	0	0	0	0	1	0	0	1	3	7
1	0	0	0	0	0	1	1	0	0	0	3	7
1	0	0	0	0	0	0	1	0	0	0	2	7
0	1	0	0	0	0	0	0	0	0	0	1	7
1	0	0	0	0	0	0	0	0	0	0	1	7
0	0	1	0	0	0	1	1	0	0	1	4	6
1	1	0	0	0	0	1	0	0	0	0	3	6
1	1	1	0	0	0	0	0	0	0	0	3	6
0	0	0	0	0	0	0	1	1	0	0	2	6
0	0	0	0	0	0	1	0	1	0	0	2	6
0	0	1	0	0	0	0	1	0	0	0	2	6
1	0	1	0	0	0	1	1	0	0	0	4	5
1	1	1	0	0	0	1	0	0	0	0	4	5
0	0	1	0	0	0	0	1	0	0	1	3	5
0	0	1	0	0	0	1	0	0	0	1	3	5
0	0	1	0	1	0	1	0	0	0	0	3	5
0	0	0	0	0	0	0	0	0	1	1	2	5
0	0	0	0	0	0	0	0	1	1	0	2	5
0	0	0	0	1	0	1	0	0	0	0	2	5
0	0	1	0	0	0	0	0	0	0	1	2	5
1	0	0	1	0	0	0	0	0	0	0	2	5
0	0	0	0	1	0	0	0	0	0	0	1	5
0	0	0	1	0	0	1	1	0	0	0	3	4
0	1	1	0	0	0	0	0	0	0	0	2	4
1	1	1	1	1	1	1	0	1	0	0	8	3
0	0	1	0	1	0	0	1	0	0	1	4	3
0	0	1	0	1	0	1	1	0	0	0	4	3
0	1	0	0	0	0	1	1	0	0	1	4	3
1	0	0	0	0	0	1	1	0	0	1	4	3
1	1	1	0	0	0	0	0	0	0	1	4	3
1	1	1	0	0	1	0	0	0	0	0	4	3
0	0	0	0	0	0	0	0	1	1	1	3	3
0	0	0	0	0	0	1	1	1	0	0	3	3
0	0	0	1	0	0	0	1	0	0	1	3	3
0	0	1	1	0	0	0	1	0	0	0	3	3
0	1	0	0	0	0	0	1	0	0	1	3	3
0	1	1	0	0	0	0	1	0	0	0	3	3
1	0	0	0	0	0	1	0	0	0	1	3	3
1	0	0	0	1	0	1	0	0	0	0	3	3
1	0	1	0	0	0	0	0	0	0	1	3	3
1	0	1	0	0	0	0	1	0	0	0	3	3
1	0	1	0	0	0	1	0	0	0	0	3	3
1	0	1	0	0	1	0	0	0	0	0	3	3
1	0	1	1	0	0	0	0	0	0	0	3	3
0	0	0	0	0	1	1	0	0	0	0	2	3
0	0	1	1	0	0	0	0	0	0	0	2	3
0	1	0	0	0	0	1	0	0	0	0	2	3
1	0	0	0	0	0	0	0	1	0	0	2	3
1	0	1	0	0	0	0	0	0	0	0	2	3
1	1	1	1	1	1	0	1	1	0	0	8	2
0	0	1	0	1	0	1	1	0	0	1	5	2
1	0	0	0	0	1	1	1	0	0	1	5	2
1	0	1	0	0	0	1	1	0	0	1	5	2
1	0	1	1	1	0	1	0	0	0	0	5	2
1	1	1	0	0	0	1	1	0	0	0	5	2
1	1	1	0	1	1	0	0	0	0	0	5	2
0	0	0	0	0	1	0	1	1	0	1	4	2
0	0	0	1	0	0	1	1	0	0	1	4	2
0	0	1	0	0	0	1	1	0	1	0	4	2
0	0	1	0	1	0	1	0	0	1	0	4	2
0	1	1	1	0	1	0	0	0	0	0	4	2
1	0	0	0	0	1	1	1	0	0	0	4	2
1	0	1	0	0	0	0	1	0	0	1	4	2
1	0	1	1	0	0	1	0	0	0	0	4	2
1	1	0	0	0	0	1	0	0	0	1	4	2
1	1	0	0	0	0	1	1	0	0	0	4	2
0	0	0	0	0	0	0	1	0	1	1	3	2
0	0	0	0	0	0	1	0	0	1	1	3	2
0	0	0	0	0	0	1	0	1	0	1	3	2
0	0	0	0	0	1	0	1	0	0	1	3	2
0	0	0	0	0	1	1	1	0	0	0	3	2
0	0	0	0	1	0	1	0	1	0	0	3	2
0	0	0	0	1	1	0	1	0	0	0	3	2
0	0	0	1	0	0	1	0	0	0	1	3	2
0	0	1	0	0	0	0	1	0	1	0	3	2
0	0	1	0	0	0	1	0	1	0	0	3	2
0	0	1	0	1	0	0	0	0	0	1	3	2
0	0	1	1	0	0	0	0	0	0	1	3	2
0	0	1	1	0	0	1	0	0	0	0	3	2
0	0	1	1	1	0	0	0	0	0	0	3	2
0	1	0	0	0	0	1	1	0	0	0	3	2
0	1	1	0	0	0	0	0	0	0	1	3	2
1	0	0	0	0	0	0	0	1	1	0	3	2
1	0	0	0	0	0	0	1	0	1	0	3	2
1	0	0	0	0	1	0	1	0	0	0	3	2
1	0	0	0	0	1	1	0	0	0	0	3	2
1	0	0	0	1	0	0	0	0	0	1	3	2
1	0	0	0	1	1	0	0	0	0	0	3	2
1	0	1	0	1	0	0	0	0	0	0	3	2
1	1	0	0	0	0	0	0	0	0	1	3	2
1	1	0	0	0	0	0	0	1	0	0	3	2
0	0	0	0	0	0	0	0	1	0	1	2	2
0	0	0	0	0	1	0	0	0	0	1	2	2
0	0	0	0	1	0	0	0	0	1	0	2	2
0	0	1	0	0	0	0	0	0	1	0	2	2
1	0	0	0	0	0	0	0	0	0	1	2	2
1	0	0	0	0	0	0	0	0	1	0	2	2
1	0	0	0	1	0	0	0	0	0	0	2	2
1	1	0	1	1	1	1	1	1	1	0	9	1
1	1	1	1	1	1	1	1	0	0	1	9	1
1	1	0	0	1	1	1	1	1	1	0	8	1
1	1	1	1	1	1	0	0	1	1	0	8	1
0	0	1	0	0	1	1	1	1	1	1	7	1
1	1	0	1	0	1	1	1	0	0	1	7	1
1	1	1	0	1	0	1	1	0	0	1	7	1
1	1	1	1	1	1	1	0	0	0	0	7	1
0	0	0	0	1	1	1	1	0	1	1	6	1
0	0	0	1	0	0	1	1	1	1	1	6	1
0	0	0	1	1	1	1	1	0	0	1	6	1
0	0	1	0	1	1	1	1	1	0	0	6	1
0	0	1	1	1	1	1	1	0	0	0	6	1
0	1	1	0	0	1	1	1	0	0	1	6	1
1	0	0	0	1	0	1	1	0	1	1	6	1
1	0	1	0	1	0	1	1	1	0	0	6	1
1	0	1	1	0	0	1	0	1	0	1	6	1
1	0	1	1	0	0	1	1	0	0	1	6	1
1	0	1	1	1	0	0	1	0	0	1	6	1
1	1	0	0	1	1	1	1	0	0	0	6	1
1	1	1	0	0	0	1	1	0	0	1	6	1
1	1	1	0	1	0	0	1	0	0	1	6	1
1	1	1	0	1	0	1	0	1	0	0	6	1
1	1	1	1	0	0	1	0	0	0	1	6	1
0	0	0	0	0	0	1	1	1	1	1	5	1
0	0	0	0	0	1	0	1	1	1	1	5	1
0	0	0	0	0	1	1	1	1	1	0	5	1
0	0	0	0	1	0	1	1	0	1	1	5	1
0	0	0	1	0	0	1	1	1	0	1	5	1
0	0	0	1	0	1	1	1	0	0	1	5	1
0	0	0	1	1	0	1	1	0	1	0	5	1
0	0	1	0	0	0	1	1	1	1	0	5	1
0	0	1	0	0	1	1	1	0	0	1	5	1
0	0	1	0	0	1	1	1	1	0	0	5	1
0	0	1	1	0	0	0	1	1	0	1	5	1
0	0	1	1	0	0	1	0	0	1	1	5	1
0	0	1	1	0	0	1	1	0	0	1	5	1
0	1	0	0	0	0	1	1	0	1	1	5	1
0	1	0	1	0	0	1	1	0	0	1	5	1
0	1	1	0	0	0	1	0	1	0	1	5	1
0	1	1	0	0	0	1	1	0	0	1	5	1
0	1	1	1	0	0	1	1	0	0	0	5	1
1	0	0	0	0	1	0	1	1	0	1	5	1
1	0	0	1	0	0	1	0	1	0	1	5	1
1	0	0	1	0	0	1	0	1	1	0	5	1
1	0	0	1	0	0	1	1	1	0	0	5	1
1	0	1	0	0	0	0	1	1	1	0	5	1
1	0	1	0	0	0	1	1	0	1	0	5	1
1	0	1	0	0	1	0	1	0	0	1	5	1
1	0	1	0	1	0	0	0	1	0	1	5	1
1	0	1	0	1	0	0	1	0	0	1	5	1
1	0	1	0	1	0	1	0	0	0	1	5	1
1	0	1	0	1	0	1	1	0	0	0	5	1
1	0	1	1	0	0	0	0	1	1	0	5	1
1	0	1	1	0	0	0	1	0	0	1	5	1
1	0	1	1	0	0	1	0	0	0	1	5	1
1	0	1	1	0	0	1	1	0	0	0	5	1
1	0	1	1	1	0	0	0	0	1	0	5	1
1	1	0	0	0	1	1	0	1	0	0	5	1
1	1	0	1	0	0	1	1	0	0	0	5	1
1	1	1	0	0	0	0	1	0	0	1	5	1
1	1	1	0	1	0	0	0	0	0	1	5	1
1	1	1	0	1	0	1	0	0	0	0	5	1
1	1	1	1	0	0	0	1	0	0	0	5	1
1	1	1	1	0	0	1	0	0	0	0	5	1
0	0	0	0	0	1	0	1	0	1	1	4	1
0	0	0	0	0	1	1	0	1	1	0	4	1
0	0	0	0	0	1	1	1	0	0	1	4	1
0	0	0	0	0	1	1	1	1	0	0	4	1
0	0	0	0	1	0	0	1	1	1	0	4	1
0	0	0	0	1	0	1	0	1	0	1	4	1
0	0	0	0	1	0	1	0	1	1	0	4	1
0	0	0	0	1	0	1	1	0	0	1	4	1
0	0	0	0	1	1	1	0	0	0	1	4	1
0	0	0	0	1	1	1	1	0	0	0	4	1
0	0	0	1	0	0	0	1	0	1	1	4	1
0	0	0	1	0	0	0	1	1	1	0	4	1
0	0	0	1	1	0	1	1	0	0	0	4	1
0	0	0	1	1	1	1	0	0	0	0	4	1
0	0	1	0	0	0	0	1	0	1	1	4	1
0	0	1	0	0	0	1	0	1	0	1	4	1
0	0	1	0	0	1	1	1	0	0	0	4	1
0	0	1	0	1	0	0	1	1	0	0	4	1
0	0	1	1	0	0	0	0	1	1	0	4	1
0	0	1	1	0	0	0	1	0	0	1	4	1
0	0	1	1	0	0	1	0	1	0	0	4	1
0	0	1	1	0	0	1	1	0	0	0	4	1
0	0	1	1	0	1	0	0	0	0	1	4	1
0	0	1	1	0	1	1	0	0	0	0	4	1
0	1	0	0	0	0	1	1	1	0	0	4	1
0	1	0	0	0	1	1	1	0	0	0	4	1
0	1	0	1	0	0	1	1	0	0	0	4	1
0	1	1	0	0	0	0	0	0	1	1	4	1
0	1	1	0	0	0	1	1	0	0	0	4	1
0	1	1	0	1	1	0	0	0	0	0	4	1
0	1	1	1	1	0	0	0	0	0	0	4	1
1	0	0	0	0	0	1	0	0	1	1	4	1
1	0	0	0	0	0	1	1	0	1	0	4	1
1	0	0	0	0	1	0	0	1	0	1	4	1
1	0	0	0	0	1	0	0	1	1	0	4	1
1	0	0	0	1	0	0	0	1	0	1	4	1
1	0	0	0	1	0	0	1	0	0	1	4	1
1	0	0	0	1	0	1	0	0	0	1	4	1
1	0	0	0	1	0	1	1	0	0	0	4	1
1	0	0	1	0	0	1	0	0	0	1	4	1
1	0	0	1	0	0	1	1	0	0	0	4	1
1	0	1	0	0	0	0	0	0	1	1	4	1
1	0	1	0	0	0	1	0	0	0	1	4	1
1	0	1	0	0	1	0	0	0	0	1	4	1
1	0	1	0	0	1	1	0	0	0	0	4	1
1	0	1	0	1	0	0	1	0	0	0	4	1
1	0	1	0	1	0	1	0	0	0	0	4	1
1	0	1	1	0	0	0	0	0	1	0	4	1
1	0	1	1	0	0	0	0	1	0	0	4	1
1	0	1	1	0	0	0	1	0	0	0	4	1
1	1	0	0	0	0	0	0	1	1	0	4	1
1	1	0	0	0	0	1	0	0	1	0	4	1
1	1	0	0	0	1	0	0	0	0	1	4	1
1	1	0	0	1	0	1	0	0	0	0	4	1
1	1	0	1	0	0	1	0	0	0	0	4	1
1	1	1	0	0	0	0	1	0	0	0	4	1
1	1	1	0	1	0	0	0	0	0	0	4	1
1	1	1	1	0	0	0	0	0	0	0	4	1
0	0	0	0	0	0	0	1	1	0	1	3	1
0	0	0	0	0	1	0	0	1	0	1	3	1
0	0	0	0	0	1	0	0	1	1	0	3	1
0	0	0	0	0	1	0	1	0	1	0	3	1
0	0	0	0	0	1	0	1	1	0	0	3	1
0	0	0	0	0	1	1	0	0	0	1	3	1
0	0	0	0	1	0	0	1	0	0	1	3	1
0	0	0	0	1	0	0	1	0	1	0	3	1
0	0	0	0	1	0	0	1	1	0	0	3	1
0	0	0	0	1	0	1	0	0	0	1	3	1
0	0	0	0	1	0	1	1	0	0	0	3	1
0	0	0	0	1	1	1	0	0	0	0	3	1
0	0	0	1	0	0	0	0	1	1	0	3	1
0	0	0	1	0	0	0	1	0	1	0	3	1
0	0	0	1	0	0	0	1	1	0	0	3	1
0	0	0	1	0	0	1	0	0	1	0	3	1
0	0	0	1	0	0	1	0	1	0	0	3	1
0	0	0	1	0	1	0	1	0	0	0	3	1
0	0	0	1	0	1	1	0	0	0	0	3	1
0	0	0	1	1	1	0	0	0	0	0	3	1
0	0	1	0	0	0	0	1	1	0	0	3	1
0	0	1	0	0	0	1	0	0	1	0	3	1
0	0	1	0	0	1	0	1	0	0	0	3	1
0	0	1	0	0	1	1	0	0	0	0	3	1
0	0	1	0	1	0	0	0	0	1	0	3	1
0	0	1	1	0	1	0	0	0	0	0	3	1
0	1	0	0	0	0	0	0	1	0	1	3	1
0	1	0	0	0	0	1	0	0	1	0	3	1
0	1	0	0	1	0	0	1	0	0	0	3	1
0	1	0	1	0	0	0	0	0	1	0	3	1
0	1	0	1	0	0	0	0	1	0	0	3	1
0	1	0	1	0	1	0	0	0	0	0	3	1
0	1	0	1	1	0	0	0	0	0	0	3	1
0	1	1	0	0	0	1	0	0	0	0	3	1
0	1	1	0	1	0	0	0	0	0	0	3	1
0	1	1	1	0	0	0	0	0	0	0	3	1
1	0	0	0	0	0	0	1	1	0	0	3	1
1	0	0	0	0	1	0	0	0	0	1	3	1
1	0	0	1	0	0	0	0	0	0	1	3	1
1	0	0	1	0	0	0	0	0	1	0	3	1
1	0	0	1	0	0	0	1	0	0	0	3	1
1	0	0	1	0	0	1	0	0	0	0	3	1
1	0	0	1	0	1	0	0	0	0	0	3	1
1	0	1	0	0	0	0	0	0	1	0	3	1
1	1	0	0	0	0	0	0	0	1	0	3	1
1	1	0	0	0	0	0	1	0	0	0	3	1
0	0	0	0	0	1	0	1	0	0	0	2	1
0	0	0	0	1	0	0	0	1	0	0	2	1
0	0	0	0	1	1	0	0	0	0	0	2	1
0	0	0	1	0	0	0	0	0	1	0	2	1
0	0	0	1	0	0	1	0	0	0	0	2	1
0	0	0	1	0	1	0	0	0	0	0	2	1
0	0	0	1	1	0	0	0	0	0	0	2	1
0	0	1	0	1	0	0	0	0	0	0	2	1
0	1	0	0	0	0	0	0	0	0	1	2	1
0	1	0	0	0	0	0	0	0	1	0	2	1
0	1	0	0	0	0	0	0	1	0	0	2	1
0	1	0	0	0	0	0	1	0	0	0	2	1
0	1	0	0	1	0	0	0	0	0	0	2	1
1	0	0	0	0	1	0	0	0	0	0	2	1
1	1	0	0	0	0	0	0	0	0	0	2	1
0	0	1	0	0	0	0	0	0	0	0	1	1

## Sheet: Table S2 (D)
Improvement of the performance for different categories of diseases
	Average MRR		Average AUC
	Before selection	After selection	Before selection	After selection
All diseases	0.126535	0.0791218	0.873495	0.920894
Mendelian diseases	0.12717	0.0793563	0.872859	0.920659
Complex diseases	0.111447	0.0735493	0.888585	0.926463
Immune disease	0.18223	0.10926	0.817795	0.890756
Neurological disorders	0.111159	0.0653779	0.888872	0.934638
